# Supplementary material for: Prevalence and School-Related Factors Associated With Depression and Self-Harm in Children Aged 9 to 10 Years
Source: Research Square preprint supplement (doi:10.21203/rs.3.rs-7515755/v1), 2025-10-15
Supplement: Supplementary file 1 [file 6cb349c1a71dd2663a0ad43c.docx]

### ****Attachment: Raw Data Variable Description****

****Title:**** Description of variables in the raw dataset for the study "Comparison of Children Aged 9 to 10 Years With and Without Depression and Self-harm According to Sociodemographic Characteristics"

****Content:****

This document describes the variables and their coding contained in the accompanying raw data file.

| Variable Name | Description | Values / Coding |
| --- | --- | --- |
| ****TIME**** | Timestamp of survey submission | Format: YYYY/MM/DD HH:MM:SS |
| ****CLASS**** | Student's class designation | Text string (e.g., "小学/三年级/三年级一班" translates to "Primary School/Grade 3/Class 3-1") |
| ****GRADE**** | School grade | 3 = Grade 3 4 = Grade 4 5 = Grade 5 |
| ****GENDER**** | Gender | 0 = Female 1 = Male |
| ****AGE**** | Age in years | 9 = 9 years old 10 = 10 years old |
| ****residential_location**** | Type of residential area | 0 = Rural 1 = Urban |
| ****classmate_relationships**** | Self-reported relationship quality with classmates | 1 = Good 2 = General 3 = Poor |
| ****academic_pressure**** | Self-reported level of academic pressure | 0 = Low 1 = General 2 = High |
| ****smartphone_use**** | Frequency of smartphone use | 0 = Rarely 1 = Occasionally 2 = Frequently |
| ****bullying_frequency**** | Frequency of being bullied | 0 = No 1 = Rarely 2 = Several times 3 = Often |
| ****bullying_timing**** | Timing of the most recent bullying incident (if applicable) | 0 = No bullying experienced 1 = In the last month 2 = In the last six months 3 = In the last year 4 = More than one year ago |
| ****self_harm**** | Presence of self-harm behavior | 0 = No self-harm 1 = Self-harm present |
| ****CDI_RESULT**** | Result of the Children's Depression Inventory (CDI) screening | 0 = Non-depressed (CDI score below threshold) 1 = Depressed (CDI score at or above threshold) |

****Notes:****

The variable names correspond to the columns in the raw data file.

1. The coding for categorical variables (e.g., GENDER, residential_location, classmate_relationships, academic_pressure, smartphone_use, bullying_frequency, bullying_timing, self_harm, CDI_RESULT) is consistent with the categories presented in the analysis tables (Table 1, Table 2, Table 3) of the manuscript.
2. The CDI_RESULT is based on the standardized cutoff score for the Children's Depression Inventory.
3. This dataset has been anonymized and prepared according to relevant ethical guidelines.
