# Supplementary material for: Prevalence and School-Related Factors Associated With Depression and Self-Harm in Children Aged 9 to 10 Years
Source: Research Square preprint supplement (doi:10.21203/rs.3.rs-7515755/v1), 2025-10-15
Supplement: Supplementary file 2 [file d52fa28b40155a0ac17bb8cd.xlsx]

## Sheet: 4-6GRADE8-14YEAR 20250803-有无月经-
TIME	CLASS	GRADE	GENDER	AGE	residential_location	classmate_relationships	academic_pressure	smartphone_use	bullying_frequency	bullying_timing	self_harm	CDI_RESULT
2021/04/08 16:09:52	小学/三年级/三年级一班	3	0	9	1	1	0	2	2	3	0	0
2021/04/08 16:08:41	小学/三年级/三年级一班	3	1	9	0	1	2	1	1	2	1	1
2021/04/08 16:08:24	小学/三年级/三年级一班	3	1	9	1	1	0	1	2	1	1	0
2021/04/08 16:06:59	小学/三年级/三年级一班	3	1	9	1	2	2	1	2	4	0	0
2021/04/08 16:06:48	小学/三年级/三年级一班	3	1	9	0	2	2	2	2	1	1	1
2021/04/08 16:06:20	小学/三年级/三年级一班	3	1	10	1	2	1	1	2	1	0	0
2021/04/08 16:07:05	小学/三年级/三年级一班	3	1	10	1	2	2	2	2	1	0	0
2021/04/08 16:08:18	小学/三年级/三年级一班	3	1	9	0	1	2	2	2	4	0	0
2021/04/08 16:06:27	小学/三年级/三年级一班	3	1	9	1	2	2	2	3	0	0	0
2021/04/08 16:04:53	小学/三年级/三年级一班	3	1	9	1	2	1	2	3	0	0	0
2021/04/08 16:03:07	小学/三年级/三年级一班	3	0	9	1	2	1	2	2	1	1	0
2021/04/08 16:03:50	小学/三年级/三年级一班	3	0	10	0	2	1	2	1	2	0	0
2021/04/08 16:02:27	小学/三年级/三年级一班	3	1	9	1	1	2	2	2	1	0	0
2021/04/08 16:02:10	小学/三年级/三年级一班	3	0	10	0	1	2	2	3	0	0	0
2021/04/08 16:03:04	小学/三年级/三年级一班	3	1	10	1	1	1	1	2	1	0	0
2021/04/08 16:02:35	小学/三年级/三年级一班	3	0	9	1	2	2	0	3	0	1	1
2021/04/08 16:12:05	小学/三年级/三年级一班	3	1	10	1	2	1	2	3	0	0	0
2021/04/08 16:02:46	小学/三年级/三年级一班	3	1	10	1	2	2	1	2	1	0	0
2021/04/08 16:02:46	小学/三年级/三年级一班	3	0	10	0	1	1	2	1	2	0	0
2021/04/08 15:59:51	小学/三年级/三年级一班	3	0	9	1	1	1	0	1	1	0	0
2021/04/08 16:06:25	小学/三年级/三年级一班	3	1	9	1	2	1	2	3	0	0	0
2021/04/08 16:00:05	小学/三年级/三年级一班	3	1	10	1	2	2	2	3	0	0	0
2021/04/08 15:59:52	小学/三年级/三年级一班	3	1	9	0	1	2	2	2	4	0	0
2021/04/08 15:58:57	小学/三年级/三年级一班	3	0	10	0	2	2	1	3	0	0	0
2021/04/08 16:00:16	小学/三年级/三年级一班	3	0	9	0	1	1	1	2	2	0	0
2021/04/08 15:59:38	小学/三年级/三年级一班	3	0	9	1	1	1	1	2	2	1	1
2021/04/08 15:58:32	小学/三年级/三年级一班	3	0	10	1	2	2	2	3	0	0	0
2021/04/08 15:57:54	小学/三年级/三年级一班	3	0	9	1	2	2	1	2	4	0	0
2021/04/08 16:03:53	小学/三年级/三年级一班	3	1	9	1	1	1	1	2	1	0	1
2021/04/08 16:00:25	小学/三年级/三年级一班	3	1	10	1	2	1	0	2	1	0	0
2021/04/08 15:58:35	小学/三年级/三年级一班	3	1	9	0	2	2	1	2	1	0	0
2021/04/08 15:56:58	小学/三年级/三年级一班	3	0	10	1	2	0	1	0	3	1	1
2021/04/08 15:57:02	小学/三年级/三年级一班	3	0	10	1	2	2	2	3	0	0	0
2021/04/08 15:57:30	小学/三年级/三年级一班	3	0	9	0	2	2	2	2	2	0	0
2021/04/08 15:58:15	小学/三年级/三年级一班	3	0	9	1	2	2	2	2	1	0	0
2021/04/08 15:57:21	小学/三年级/三年级一班	3	0	9	0	1	1	1	2	2	0	0
2021/04/08 15:58:01	小学/三年级/三年级一班	3	1	10	1	2	1	1	2	2	0	0
2021/04/08 15:09:51	小学/三年级/三年级二班	3	1	9	0	2	1	1	3	0	0	1
2021/04/08 15:09:06	小学/三年级/三年级二班	3	1	9	0	2	1	1	2	4	0	0
2021/04/08 15:06:24	小学/三年级/三年级二班	3	0	10	1	2	1	1	3	0	0	0
2021/04/08 15:06:47	小学/三年级/三年级二班	3	0	9	0	1	1	0	2	1	0	1
2021/04/08 15:07:38	小学/三年级/三年级二班	3	1	9	1	2	1	2	2	4	1	0
2021/04/08 15:06:41	小学/三年级/三年级二班	3	0	9	1	1	2	0	2	1	1	1
2021/04/08 15:06:07	小学/三年级/三年级二班	3	0	10	0	1	2	2	2	1	0	0
2021/04/08 15:08:33	小学/三年级/三年级二班	3	1	9	1	1	1	1	2	4	1	0
2021/04/08 15:06:37	小学/三年级/三年级二班	3	1	10	1	2	2	1	3	0	0	0
2021/04/08 15:07:51	小学/三年级/三年级二班	3	1	9	1	1	2	2	3	0	0	0
2021/04/08 15:06:20	小学/三年级/三年级二班	3	1	9	1	2	1	1	3	0	0	0
2021/04/08 15:05:39	小学/三年级/三年级二班	3	1	10	1	2	0	1	2	4	0	1
2021/04/08 15:06:24	小学/三年级/三年级二班	3	1	9	0	1	1	1	3	0	0	0
2021/04/08 15:03:51	小学/三年级/三年级二班	3	0	9	0	2	1	1	3	0	0	1
2021/04/08 15:04:10	小学/三年级/三年级二班	3	0	9	1	1	1	1	2	2	0	1
2021/04/08 15:04:47	小学/三年级/三年级二班	3	0	9	0	1	1	1	2	1	1	0
2021/04/08 15:03:22	小学/三年级/三年级二班	3	0	9	0	1	1	0	1	3	1	0
2021/04/08 15:04:31	小学/三年级/三年级二班	3	1	9	0	2	2	0	3	0	0	0
2021/04/08 15:05:39	小学/三年级/三年级二班	3	0	9	0	2	0	2	1	3	1	1
2021/04/08 15:03:28	小学/三年级/三年级二班	3	0	10	1	2	0	0	2	1	1	1
2021/04/08 15:03:22	小学/三年级/三年级二班	3	0	9	1	2	0	1	2	1	0	0
2021/04/08 15:03:55	小学/三年级/三年级二班	3	1	10	0	1	2	1	2	3	0	0
2021/04/08 15:06:07	小学/三年级/三年级二班	3	1	10	1	1	1	0	2	1	0	1
2021/04/08 15:03:31	小学/三年级/三年级二班	3	0	10	0	1	1	2	2	2	0	0
2021/04/08 15:03:40	小学/三年级/三年级二班	3	1	9	0	1	2	1	3	0	0	0
2021/04/08 15:03:26	小学/三年级/三年级二班	3	1	9	0	2	2	1	3	0	0	0
2021/04/08 15:04:54	小学/三年级/三年级二班	3	1	10	0	2	1	1	3	0	0	0
2021/04/08 15:03:48	小学/三年级/三年级二班	3	1	9	1	2	1	1	3	0	0	0
2021/04/08 15:02:11	小学/三年级/三年级二班	3	1	9	0	2	1	1	3	0	0	0
2021/04/08 15:03:15	小学/三年级/三年级二班	3	1	9	1	2	2	1	3	0	0	0
2021/04/08 15:01:06	小学/三年级/三年级二班	3	0	10	1	1	1	2	2	3	0	0
2021/04/08 14:59:32	小学/三年级/三年级二班	3	0	10	1	2	2	0	2	4	1	1
2021/04/08 14:59:52	小学/三年级/三年级二班	3	1	10	1	2	2	2	2	4	0	0
2021/04/08 14:59:54	小学/三年级/三年级二班	3	0	10	1	2	2	1	2	1	0	0
2021/04/08 15:03:15	小学/三年级/三年级二班	3	0	10	1	2	2	1	3	0	1	1
2021/04/08 14:58:36	小学/三年级/三年级二班	3	0	9	1	1	1	1	3	0	0	0
2021/04/08 14:59:28	小学/三年级/三年级二班	3	0	10	0	1	1	1	3	0	0	0
2021/04/08 14:58:36	小学/三年级/三年级二班	3	0	9	1	1	1	0	2	4	0	0
2021/04/13 14:19:54	小学/三年级/三年级二班	3	0	10	0	1	1	1	2	4	0	0
2021/04/13 14:19:20	小学/三年级/三年级二班	3	1	9	0	2	2	2	2	1	0	0
2021/04/13 14:18:35	小学/三年级/三年级二班	3	1	9	0	1	1	2	2	1	0	0
2021/04/13 14:19:02	小学/三年级/三年级二班	3	0	9	0	1	0	1	1	3	0	0
2021/04/13 14:17:39	小学/三年级/三年级二班	3	0	9	0	1	2	1	2	4	0	0
2021/04/13 14:17:21	小学/三年级/三年级二班	3	0	10	0	1	1	2	3	0	0	0
2021/04/13 14:17:43	小学/三年级/三年级二班	3	0	9	0	1	1	2	2	4	1	0
2021/04/13 14:16:37	小学/三年级/三年级二班	3	0	9	0	1	2	2	3	0	0	0
2021/04/13 14:16:02	小学/三年级/三年级二班	3	1	10	0	1	2	2	3	0	0	0
2021/04/13 14:17:27	小学/三年级/三年级二班	3	0	10	1	0	2	2	0	3	0	0
2021/04/13 14:15:54	小学/三年级/三年级二班	3	0	9	0	2	1	2	2	4	0	0
2021/04/13 14:14:14	小学/三年级/三年级二班	3	0	10	0	2	2	2	3	0	0	0
2021/04/13 14:14:12	小学/三年级/三年级二班	3	1	10	0	2	1	2	3	0	0	0
2021/04/13 14:16:17	小学/三年级/三年级二班	3	1	10	0	1	1	1	3	0	0	0
2021/04/13 14:13:52	小学/三年级/三年级二班	3	0	9	0	1	1	1	2	2	0	0
2021/04/13 14:12:54	小学/三年级/三年级二班	3	1	10	0	1	1	1	2	1	0	0
2021/04/13 14:11:40	小学/三年级/三年级二班	3	1	9	0	1	1	2	3	0	0	0
2021/04/13 14:13:25	小学/三年级/三年级二班	3	0	9	0	1	1	1	2	4	0	0
2021/04/13 14:15:33	小学/三年级/三年级二班	3	1	9	0	1	1	1	2	1	0	0
2021/04/13 14:12:47	小学/三年级/三年级二班	3	1	9	0	2	1	2	1	3	1	0
2021/04/13 14:12:14	小学/三年级/三年级二班	3	1	9	0	2	2	2	3	0	0	0
2021/04/13 14:15:26	小学/三年级/三年级二班	3	0	10	0	2	1	2	3	0	0	0
2021/04/13 14:10:46	小学/三年级/三年级二班	3	0	9	0	2	2	1	1	4	1	0
2021/04/13 14:16:44	小学/三年级/三年级二班	3	1	9	0	2	1	2	3	0	1	0
2021/04/13 14:15:04	小学/三年级/三年级二班	3	1	9	0	2	2	1	3	0	0	0
2021/04/13 14:13:05	小学/三年级/三年级二班	3	1	9	0	2	2	2	3	0	0	0
2021/04/13 14:12:35	小学/三年级/三年级二班	3	1	10	0	2	1	1	2	1	0	0
2021/04/13 14:10:54	小学/三年级/三年级二班	3	0	10	0	2	2	2	2	1	0	0
2021/04/13 14:12:55	小学/三年级/三年级二班	3	1	9	0	2	1	0	2	4	0	0
2021/04/13 14:11:35	小学/三年级/三年级二班	3	1	10	0	2	1	2	3	0	0	0
2021/04/13 14:11:12	小学/三年级/三年级二班	3	0	10	0	2	2	1	3	0	0	0
2021/04/13 14:10:28	小学/三年级/三年级二班	3	1	9	0	2	1	1	2	1	0	0
2021/04/13 14:12:47	小学/三年级/三年级二班	3	1	10	0	2	1	2	2	2	0	0
2021/04/13 14:13:20	小学/三年级/三年级二班	3	1	9	0	1	1	2	3	0	0	0
2021/04/13 14:11:31	小学/三年级/三年级二班	3	1	9	0	2	0	2	3	0	0	0
2021/04/13 14:09:50	小学/三年级/三年级二班	3	0	10	0	2	2	2	3	0	0	0
2021/04/13 14:11:02	小学/三年级/三年级二班	3	1	10	0	2	1	1	3	0	0	0
2021/04/13 14:09:50	小学/三年级/三年级二班	3	1	10	0	2	1	1	2	1	0	0
2021/04/13 14:08:51	小学/三年级/三年级二班	3	0	9	0	2	1	1	0	3	0	0
2021/04/13 14:08:32	小学/三年级/三年级二班	3	0	9	0	2	1	2	2	4	0	0
2021/04/13 14:08:27	小学/三年级/三年级二班	3	0	10	0	2	2	1	3	0	0	0
2021/04/13 14:08:49	小学/三年级/三年级二班	3	0	10	0	2	1	1	2	3	0	0
2021/04/13 14:07:24	小学/三年级/三年级二班	3	1	10	0	2	2	1	3	0	0	0
2021/04/13 11:42:51	小学/三年级/三年级一班	3	0	9	0	2	1	1	2	1	0	0
2021/04/13 11:37:43	小学/三年级/三年级一班	3	0	10	0	2	2	2	3	0	0	0
2021/04/13 11:36:20	小学/三年级/三年级一班	3	0	9	0	1	0	2	2	4	0	0
2021/04/13 11:36:25	小学/三年级/三年级一班	3	0	9	0	1	1	2	1	1	0	0
2021/04/13 11:36:00	小学/三年级/三年级一班	3	1	10	0	2	2	1	1	1	0	0
2021/04/13 11:35:04	小学/三年级/三年级一班	3	0	9	0	1	2	2	3	0	0	0
2021/04/13 11:34:58	小学/三年级/三年级一班	3	0	9	1	0	0	2	2	2	0	0
2021/04/13 11:36:02	小学/三年级/三年级一班	3	0	9	0	1	1	2	3	0	0	0
2021/04/13 11:37:24	小学/三年级/三年级一班	3	1	9	0	1	2	2	3	0	0	0
2021/04/13 11:36:04	小学/三年级/三年级一班	3	1	10	0	2	2	2	3	0	0	0
2021/04/13 11:36:28	小学/三年级/三年级一班	3	1	9	0	2	1	1	2	4	1	0
2021/04/13 11:34:15	小学/三年级/三年级一班	3	1	9	0	1	2	2	2	4	0	0
2021/04/13 11:34:24	小学/三年级/三年级一班	3	1	9	0	2	1	1	3	0	0	0
2021/04/13 11:34:07	小学/三年级/三年级一班	3	1	9	0	2	2	2	2	1	0	0
2021/04/13 11:33:35	小学/三年级/三年级一班	3	0	9	0	2	1	1	2	2	0	0
2021/04/13 11:34:00	小学/三年级/三年级一班	3	1	9	0	2	1	1	2	1	0	0
2021/04/13 11:33:51	小学/三年级/三年级一班	3	1	9	0	2	2	1	3	0	0	0
2021/04/13 11:34:12	小学/三年级/三年级一班	3	0	10	0	1	1	1	2	1	0	0
2021/04/13 11:34:32	小学/三年级/三年级一班	3	1	9	0	1	1	1	3	0	0	0
2021/04/13 11:33:43	小学/三年级/三年级一班	3	0	10	0	0	1	2	3	0	0	0
2021/04/13 11:34:40	小学/三年级/三年级一班	3	1	9	1	2	1	2	3	0	0	0
2021/04/13 11:32:50	小学/三年级/三年级一班	3	1	9	0	1	2	2	2	1	1	0
2021/04/13 11:34:43	小学/三年级/三年级一班	3	0	9	0	2	2	2	3	0	0	0
2021/04/13 11:32:12	小学/三年级/三年级一班	3	0	9	0	2	2	2	3	0	0	0
2021/04/13 11:36:41	小学/三年级/三年级一班	3	1	10	0	2	1	2	2	4	0	0
2021/04/13 11:34:36	小学/三年级/三年级一班	3	1	9	0	2	2	1	3	0	0	0
2021/04/13 11:32:12	小学/三年级/三年级一班	3	1	9	1	2	1	2	3	0	0	0
2021/04/13 11:33:42	小学/三年级/三年级一班	3	0	9	0	2	0	2	1	1	0	0
2021/04/13 11:31:48	小学/三年级/三年级一班	3	0	9	1	1	2	1	2	1	0	0
2021/04/13 11:30:57	小学/三年级/三年级一班	3	0	9	0	2	2	2	3	0	0	0
2021/04/13 11:31:59	小学/三年级/三年级一班	3	0	9	0	1	1	2	2	1	0	0
2021/04/13 11:33:17	小学/三年级/三年级一班	3	1	9	0	1	1	1	2	1	0	0
2021/04/13 11:34:33	小学/三年级/三年级一班	3	1	9	0	1	1	1	2	1	0	0
2021/04/13 11:31:53	小学/三年级/三年级一班	3	1	9	0	1	1	2	3	0	0	0
2021/04/13 11:32:44	小学/三年级/三年级一班	3	1	9	0	2	2	2	3	0	0	0
2021/04/13 11:32:36	小学/三年级/三年级一班	3	1	9	0	2	2	2	3	0	0	0
2021/04/13 11:32:32	小学/三年级/三年级一班	3	1	10	0	0	2	2	2	1	0	0
2021/04/13 11:31:35	小学/三年级/三年级一班	3	0	10	1	2	1	1	2	1	0	0
2021/04/13 11:30:40	小学/三年级/三年级一班	3	0	9	0	2	1	1	3	0	0	0
2021/04/13 11:30:59	小学/三年级/三年级一班	3	0	10	0	2	1	1	2	2	0	0
2021/04/13 11:31:28	小学/三年级/三年级一班	3	1	9	0	2	2	2	3	0	0	0
2021/04/13 11:31:15	小学/三年级/三年级一班	3	0	10	0	2	2	2	3	0	0	0
2021/04/13 11:32:47	小学/三年级/三年级一班	3	1	10	0	2	1	0	3	0	0	0
2021/04/13 11:30:44	小学/三年级/三年级一班	3	1	10	0	2	1	2	2	1	0	0
2021/04/13 11:30:18	小学/三年级/三年级一班	3	0	9	0	2	2	2	3	0	0	0
2021/04/13 11:30:07	小学/三年级/三年级一班	3	0	9	0	1	1	2	3	0	0	0
2021/04/13 11:29:48	小学/三年级/三年级一班	3	0	9	0	2	2	1	3	0	0	0
2021/04/13 11:35:46	小学/三年级/三年级一班	3	0	9	0	2	1	1	3	0	0	0
2021/04/13 10:57:03	小学/三年级/三年级三班	3	0	9	0	2	1	1	3	0	0	0
2021/04/13 10:56:41	小学/三年级/三年级三班	3	0	9	0	2	1	2	2	1	0	0
2021/04/13 10:55:43	小学/三年级/三年级三班	3	1	9	0	2	1	0	1	1	0	0
2021/04/13 10:55:56	小学/三年级/三年级三班	3	0	9	1	2	1	2	2	1	0	0
2021/04/13 10:55:57	小学/三年级/三年级三班	3	1	9	0	1	1	1	3	0	0	0
2021/04/13 10:54:55	小学/三年级/三年级三班	3	1	9	0	2	1	2	3	0	0	0
2021/04/13 10:56:08	小学/三年级/三年级三班	3	0	9	0	1	1	0	2	3	0	0
2021/04/13 10:53:57	小学/三年级/三年级三班	3	1	9	1	2	2	2	3	0	0	0
2021/04/13 10:53:24	小学/三年级/三年级三班	3	0	9	0	1	1	1	3	0	0	0
2021/04/13 10:52:47	小学/三年级/三年级三班	3	0	9	0	1	0	2	0	3	0	0
2021/04/13 10:52:27	小学/三年级/三年级三班	3	1	10	0	2	2	1	2	2	0	0
2021/04/13 10:53:08	小学/三年级/三年级三班	3	0	10	0	2	1	1	2	4	0	0
2021/04/13 10:51:29	小学/三年级/三年级三班	3	0	9	0	2	1	1	2	4	0	0
2021/04/13 10:52:33	小学/三年级/三年级三班	3	1	9	0	1	1	2	2	4	0	0
2021/04/13 10:52:56	小学/三年级/三年级三班	3	0	9	0	1	1	2	3	0	0	0
2021/04/13 10:51:18	小学/三年级/三年级三班	3	1	9	0	2	2	2	3	0	0	0
2021/04/13 10:52:15	小学/三年级/三年级三班	3	0	9	0	2	1	1	3	0	0	0
2021/04/13 10:52:35	小学/三年级/三年级三班	3	1	9	0	2	1	1	3	0	0	0
2021/04/13 10:53:02	小学/三年级/三年级三班	3	1	9	0	2	2	2	2	4	0	0
2021/04/13 10:50:00	小学/三年级/三年级三班	3	0	9	0	1	1	2	2	1	0	0
2021/04/13 10:51:21	小学/三年级/三年级三班	3	1	9	0	1	2	2	2	1	0	0
2021/04/13 10:50:21	小学/三年级/三年级三班	3	1	10	0	1	1	2	3	0	0	0
2021/04/13 10:52:36	小学/三年级/三年级三班	3	1	10	0	1	1	1	2	3	0	0
2021/04/13 10:48:43	小学/三年级/三年级三班	3	0	9	0	1	2	2	1	1	0	0
2021/04/13 10:49:34	小学/三年级/三年级三班	3	1	9	0	1	1	2	3	0	0	0
2021/04/13 10:47:29	小学/三年级/三年级三班	3	0	10	0	2	1	1	3	0	0	0
2021/04/13 10:47:12	小学/三年级/三年级三班	3	0	9	0	2	1	2	3	0	0	0
2021/04/13 10:47:25	小学/三年级/三年级三班	3	0	9	0	2	2	2	3	0	0	0
2021/04/13 10:48:28	小学/三年级/三年级三班	3	1	10	0	2	2	2	0	1	0	0
2021/04/13 10:48:12	小学/三年级/三年级三班	3	1	9	0	2	1	1	2	4	0	0
2021/04/13 10:46:51	小学/三年级/三年级三班	3	1	9	0	1	0	1	3	0	0	0
2021/04/13 10:48:16	小学/三年级/三年级三班	3	1	9	0	2	1	1	2	4	0	0
2021/04/13 10:49:41	小学/三年级/三年级三班	3	1	9	0	2	2	2	3	0	0	0
2021/04/13 10:49:44	小学/三年级/三年级三班	3	1	9	0	2	1	2	3	0	0	0
2021/04/13 10:46:46	小学/三年级/三年级三班	3	0	9	0	2	2	1	2	4	0	0
2021/04/13 10:52:28	小学/三年级/三年级三班	3	1	9	0	2	2	2	2	4	0	0
2021/04/13 10:43:25	小学/三年级/三年级三班	3	0	9	0	2	1	2	3	0	0	0
2021/04/13 10:44:50	小学/三年级/三年级三班	3	0	10	0	1	2	1	1	4	0	0
2021/04/13 10:42:32	小学/三年级/三年级三班	3	0	9	0	2	1	2	2	4	0	0
2021/04/13 10:41:09	小学/三年级/三年级三班	3	0	9	0	2	1	1	2	4	1	0
2021/04/13 10:29:59	小学/三年级/三年级四班	3	0	9	0	2	2	2	3	0	0	0
2021/04/13 10:30:50	小学/三年级/三年级四班	3	1	9	0	1	2	2	2	4	0	0
2021/04/13 10:30:21	小学/三年级/三年级四班	3	1	9	0	2	2	1	3	0	0	0
2021/04/13 10:27:17	小学/三年级/三年级四班	3	0	10	0	2	2	2	3	0	0	0
2021/04/13 10:27:36	小学/三年级/三年级四班	3	0	10	0	2	0	2	3	0	1	0
2021/04/13 10:26:35	小学/三年级/三年级四班	3	1	10	0	1	1	2	3	0	0	0
2021/04/13 10:28:49	小学/三年级/三年级四班	3	1	9	0	1	2	1	2	1	0	0
2021/04/13 10:24:59	小学/三年级/三年级四班	3	1	9	0	1	2	1	3	0	0	0
2021/04/13 10:26:52	小学/三年级/三年级四班	3	1	9	0	2	0	2	3	0	0	0
2021/04/13 10:24:03	小学/三年级/三年级四班	3	0	9	0	1	1	1	2	2	0	0
2021/04/13 10:24:25	小学/三年级/三年级四班	3	1	10	0	1	2	1	2	4	0	0
2021/04/13 10:23:55	小学/三年级/三年级四班	3	1	10	0	1	2	1	3	0	0	0
2021/04/13 10:22:51	小学/三年级/三年级四班	3	1	10	0	2	1	1	3	0	0	0
2021/04/13 10:21:49	小学/三年级/三年级四班	3	1	9	0	1	1	1	3	0	0	0
2021/04/13 10:21:51	小学/三年级/三年级四班	3	0	10	0	2	1	2	2	1	0	0
2021/04/13 10:23:09	小学/三年级/三年级四班	3	1	9	0	1	2	2	2	3	0	0
2021/04/13 10:23:14	小学/三年级/三年级四班	3	1	9	0	1	1	2	2	3	0	0
2021/04/13 10:23:27	小学/三年级/三年级四班	3	1	9	0	2	2	1	2	3	0	0
2021/04/13 10:21:17	小学/三年级/三年级四班	3	0	9	0	2	2	2	3	0	0	0
2021/04/13 10:21:17	小学/三年级/三年级四班	3	0	9	0	2	2	2	3	0	0	0
2021/04/13 10:22:46	小学/三年级/三年级四班	3	1	9	0	2	0	2	3	0	0	0
2021/04/13 10:19:36	小学/三年级/三年级四班	3	0	9	0	2	2	2	2	1	0	0
2021/04/13 10:19:23	小学/三年级/三年级四班	3	1	9	0	2	2	1	3	0	0	0
2021/04/13 10:18:30	小学/三年级/三年级四班	3	0	9	0	2	2	1	3	0	0	0
2021/04/13 10:19:01	小学/三年级/三年级四班	3	1	9	0	2	2	2	3	0	0	0
2021/04/13 10:18:31	小学/三年级/三年级四班	3	0	9	0	2	1	1	2	1	0	0
2021/04/13 10:20:02	小学/三年级/三年级四班	3	1	9	0	2	1	1	2	4	0	0
2021/04/13 10:18:13	小学/三年级/三年级四班	3	1	9	0	2	2	2	3	0	0	0
2021/04/13 10:18:33	小学/三年级/三年级四班	3	0	9	0	1	1	1	1	4	0	0
2021/04/13 10:17:43	小学/三年级/三年级四班	3	0	9	1	1	1	1	2	2	0	0
2021/04/13 10:18:41	小学/三年级/三年级四班	3	1	9	0	2	1	1	2	2	0	0
2021/04/13 10:22:22	小学/三年级/三年级四班	3	1	10	0	1	1	1	2	4	0	0
2021/04/13 10:20:12	小学/三年级/三年级四班	3	1	10	0	2	1	1	2	1	0	0
2021/04/13 10:19:08	小学/三年级/三年级四班	3	1	10	0	2	2	1	2	4	0	0
2021/04/13 10:16:01	小学/三年级/三年级四班	3	0	9	0	2	2	1	3	0	0	0
2021/04/13 10:16:35	小学/三年级/三年级四班	3	0	10	0	1	2	1	2	4	0	0
2021/04/13 10:18:59	小学/三年级/三年级四班	3	1	9	0	1	2	1	3	0	0	0
2021/04/13 10:18:04	小学/三年级/三年级四班	3	0	9	0	2	2	1	2	1	0	0
2021/04/13 10:16:57	小学/三年级/三年级四班	3	0	10	0	1	0	2	2	3	0	0
2021/04/13 10:20:21	小学/三年级/三年级四班	3	0	10	0	2	2	2	2	4	0	0
2021/04/13 10:15:43	小学/三年级/三年级四班	3	0	9	0	2	2	2	2	4	0	0
2021/04/13 10:16:27	小学/三年级/三年级四班	3	0	9	0	1	1	1	2	3	0	0
2021/04/13 09:59:56	小学/三年级/三年级五班	3	0	9	0	2	2	1	2	4	0	0
2021/04/13 09:59:07	小学/三年级/三年级五班	3	1	9	1	2	2	1	3	0	0	0
2021/04/13 09:59:26	小学/三年级/三年级五班	3	0	9	0	1	1	2	2	1	0	0
2021/04/13 09:58:03	小学/三年级/三年级五班	3	1	9	0	2	2	2	3	0	0	0
2021/04/13 09:59:06	小学/三年级/三年级五班	3	1	9	0	2	1	1	2	4	0	0
2021/04/13 09:58:06	小学/三年级/三年级五班	3	1	9	0	2	2	1	2	2	0	0
2021/04/13 09:58:13	小学/三年级/三年级五班	3	0	10	0	2	1	1	2	4	0	0
2021/04/13 09:57:19	小学/三年级/三年级五班	3	1	10	0	1	2	1	3	0	0	0
2021/04/13 09:55:39	小学/三年级/三年级五班	3	0	10	0	1	2	2	2	1	0	0
2021/04/13 09:55:29	小学/三年级/三年级五班	3	0	9	0	2	2	2	3	0	0	0
2021/04/13 09:57:54	小学/三年级/三年级五班	3	1	9	0	2	1	2	2	1	1	0
2021/04/13 09:56:30	小学/三年级/三年级五班	3	1	9	0	2	2	1	2	1	0	0
2021/04/13 09:53:56	小学/三年级/三年级五班	3	1	9	0	1	2	1	2	1	0	0
2021/04/13 09:54:01	小学/三年级/三年级五班	3	0	9	0	1	1	2	2	3	0	0
2021/04/13 09:53:40	小学/三年级/三年级五班	3	0	9	0	2	2	2	3	0	0	0
2021/04/13 09:56:01	小学/三年级/三年级五班	3	1	9	1	2	2	2	2	4	0	0
2021/04/13 09:53:17	小学/三年级/三年级五班	3	0	10	0	2	1	2	3	0	0	0
2021/04/13 09:52:43	小学/三年级/三年级五班	3	1	9	0	1	1	2	3	0	0	0
2021/04/13 09:51:30	小学/三年级/三年级五班	3	0	10	0	2	1	2	2	1	0	0
2021/04/13 09:53:15	小学/三年级/三年级五班	3	0	9	0	1	0	1	2	1	0	0
2021/04/13 09:52:24	小学/三年级/三年级五班	3	0	9	0	1	2	0	2	2	0	0
2021/04/13 09:52:43	小学/三年级/三年级五班	3	0	9	0	1	1	2	2	1	0	0
2021/04/13 09:51:05	小学/三年级/三年级五班	3	0	9	1	2	2	1	3	0	0	0
2021/04/13 09:52:12	小学/三年级/三年级五班	3	1	9	0	2	1	1	2	1	0	0
2021/04/13 09:52:22	小学/三年级/三年级五班	3	0	9	0	2	1	1	2	4	1	0
2021/04/13 09:56:28	小学/三年级/三年级五班	3	1	9	0	2	2	1	2	1	0	0
2021/04/13 09:50:44	小学/三年级/三年级五班	3	0	10	0	2	2	2	3	0	0	0
2021/04/13 09:51:34	小学/三年级/三年级五班	3	1	9	0	2	2	2	3	0	0	0
2021/04/13 09:50:56	小学/三年级/三年级五班	3	1	10	0	2	1	1	3	0	0	0
2021/04/13 09:49:47	小学/三年级/三年级五班	3	0	10	0	2	2	2	3	0	0	0
2021/04/13 09:52:56	小学/三年级/三年级五班	3	1	9	0	2	1	2	2	1	0	0
2021/04/13 09:50:17	小学/三年级/三年级五班	3	0	9	0	2	2	2	3	0	0	0
2021/04/13 09:50:26	小学/三年级/三年级五班	3	0	9	0	2	1	2	3	0	0	0
2021/04/13 09:49:36	小学/三年级/三年级五班	3	0	9	0	2	1	2	3	0	0	0
2021/04/13 09:51:15	小学/三年级/三年级五班	3	1	9	0	2	2	2	3	0	0	0
2021/04/13 09:50:09	小学/三年级/三年级五班	3	1	9	1	2	1	1	2	1	0	0
2021/04/13 09:48:16	小学/三年级/三年级五班	3	0	9	0	2	1	2	2	2	0	0
2021/04/13 09:50:15	小学/三年级/三年级五班	3	1	10	0	2	2	2	2	2	0	0
2021/04/13 09:50:18	小学/三年级/三年级五班	3	1	10	0	1	0	2	2	4	0	0
2021/04/13 09:53:41	小学/三年级/三年级五班	3	0	10	0	1	1	2	2	1	0	0
2021/04/13 09:48:12	小学/三年级/三年级五班	3	1	10	0	2	2	2	3	0	0	0
2021/04/13 09:50:24	小学/三年级/三年级五班	3	1	9	0	2	2	2	2	4	1	0
2021/04/13 09:48:46	小学/三年级/三年级五班	3	0	9	0	2	0	2	3	0	0	0
2021/04/13 09:48:50	小学/三年级/三年级五班	3	1	9	0	2	1	1	3	0	0	0
2021/04/13 09:49:07	小学/三年级/三年级五班	3	0	9	0	2	1	1	2	2	0	0
2021/04/13 09:55:10	小学/三年级/三年级五班	3	0	9	0	1	0	1	2	3	1	0
2021/04/13 09:48:57	小学/三年级/三年级五班	3	1	9	0	2	1	1	3	0	0	0
2021/04/13 09:49:40	小学/三年级/三年级五班	3	0	10	0	2	1	2	2	1	0	0
2021/04/13 09:47:25	小学/三年级/三年级五班	3	0	10	0	1	1	2	2	1	0	0
2021/04/13 09:35:28	小学/三年级/三年级六班	3	1	9	0	2	1	2	3	0	0	0
2021/04/13 09:32:20	小学/三年级/三年级六班	3	1	9	0	2	1	2	3	0	0	0
2021/04/13 09:31:08	小学/三年级/三年级六班	3	1	9	0	2	1	2	3	0	0	0
2021/04/13 09:30:20	小学/三年级/三年级六班	3	0	9	0	1	1	1	2	2	1	0
2021/04/13 09:29:28	小学/三年级/三年级六班	3	0	10	0	2	2	1	3	0	0	0
2021/04/13 09:30:44	小学/三年级/三年级六班	3	1	9	0	2	1	2	3	0	0	0
2021/04/13 09:30:07	小学/三年级/三年级六班	3	1	9	0	1	2	1	0	3	0	0
2021/04/13 09:30:03	小学/三年级/三年级六班	3	1	9	0	2	1	1	2	4	0	0
2021/04/13 09:30:22	小学/三年级/三年级六班	3	1	9	1	1	0	2	2	2	0	0
2021/04/13 09:27:42	小学/三年级/三年级六班	3	0	9	0	2	2	1	2	1	0	0
2021/04/13 09:28:10	小学/三年级/三年级六班	3	1	9	0	2	2	2	2	1	0	0
2021/04/13 09:26:43	小学/三年级/三年级六班	3	0	9	0	2	1	0	2	3	0	0
2021/04/13 09:27:28	小学/三年级/三年级六班	3	1	9	0	2	2	2	3	0	0	0
2021/04/13 09:27:03	小学/三年级/三年级六班	3	0	10	0	2	2	1	2	3	0	0
2021/04/13 09:26:02	小学/三年级/三年级六班	3	0	9	0	1	1	1	2	4	0	0
2021/04/13 09:28:05	小学/三年级/三年级六班	3	0	9	0	2	1	2	2	2	0	0
2021/04/13 09:25:02	小学/三年级/三年级六班	3	0	10	0	2	2	2	3	0	0	0
2021/04/13 09:26:55	小学/三年级/三年级六班	3	0	10	0	1	1	1	2	4	1	0
2021/04/13 09:27:49	小学/三年级/三年级六班	3	1	10	0	2	2	2	2	1	0	0
2021/04/13 09:24:42	小学/三年级/三年级六班	3	0	9	0	2	1	2	3	0	1	0
2021/04/13 09:25:58	小学/三年级/三年级六班	3	0	10	1	2	2	2	2	4	0	0
2021/04/13 09:23:21	小学/三年级/三年级六班	3	0	9	0	2	1	2	3	0	0	0
2021/04/13 09:26:42	小学/三年级/三年级六班	3	1	10	0	2	2	2	2	1	0	0
2021/04/13 09:23:27	小学/三年级/三年级六班	3	1	9	0	2	1	1	2	2	0	0
2021/04/13 09:23:01	小学/三年级/三年级六班	3	0	10	0	2	2	1	2	1	0	0
2021/04/13 09:26:31	小学/三年级/三年级六班	3	1	9	0	1	1	2	2	2	0	0
2021/04/13 09:26:01	小学/三年级/三年级六班	3	1	9	0	1	1	2	3	0	0	0
2021/04/13 09:25:36	小学/三年级/三年级六班	3	0	9	0	1	1	1	3	0	0	0
2021/04/13 09:22:20	小学/三年级/三年级六班	3	0	10	0	1	1	1	3	0	0	0
2021/04/13 09:21:07	小学/三年级/三年级六班	3	1	9	0	2	2	2	3	0	0	0
2021/04/13 09:26:07	小学/三年级/三年级六班	3	0	9	0	2	1	1	2	1	0	0
2021/04/13 09:23:28	小学/三年级/三年级六班	3	0	9	0	1	1	1	2	1	0	0
2021/04/13 09:24:17	小学/三年级/三年级六班	3	0	9	0	1	2	2	2	4	0	0
2021/04/13 09:20:20	小学/三年级/三年级六班	3	0	9	0	2	2	1	3	0	0	0
2021/04/13 09:19:13	小学/三年级/三年级六班	3	0	9	0	2	2	2	3	0	0	0
2021/04/13 09:27:47	小学/三年级/三年级六班	3	1	9	0	2	1	2	2	1	0	0
2021/04/13 09:18:45	小学/三年级/三年级六班	3	1	9	0	2	2	1	3	0	0	0
2021/04/13 09:19:15	小学/三年级/三年级六班	3	1	9	0	2	2	2	3	0	0	0
2021/04/13 09:18:46	小学/三年级/三年级六班	3	0	9	0	1	1	0	0	3	0	0
2021/04/25 14:44:37	小学/三年级	3	0	10	1	2	2	2	3	0	1	0
2021/04/25 14:38:24	小学/三年级	3	0	9	1	2	0	2	2	3	1	1
2021/04/25 14:35:23	小学/三年级	3	0	9	0	2	1	1	2	4	1	0
2021/04/25 14:34:59	小学/三年级	3	0	10	1	1	0	2	3	0	0	0
2021/04/25 14:32:45	小学/三年级	3	1	9	0	1	1	2	3	0	0	1
2021/04/25 14:30:35	小学/三年级	3	0	9	0	1	1	2	2	2	0	0
2021/04/25 14:32:59	小学/三年级	3	1	9	1	1	1	2	3	0	0	1
2021/04/25 14:25:35	小学/三年级	3	1	9	1	2	1	0	3	0	0	0
2021/04/25 14:29:32	小学/三年级	3	1	10	0	2	0	1	2	1	0	0
2021/04/25 14:25:33	小学/三年级	3	0	9	0	2	2	2	3	0	0	0
2021/04/25 14:26:41	小学/三年级	3	0	9	1	1	0	1	1	4	0	0
2021/04/25 14:24:34	小学/三年级	3	0	9	0	1	1	1	2	1	0	0
2021/04/25 14:27:19	小学/三年级	3	1	10	0	2	2	2	2	2	0	0
2021/04/25 14:24:27	小学/三年级	3	1	9	0	2	1	1	3	0	0	0
2021/04/25 14:27:15	小学/三年级	3	1	9	0	2	1	0	2	1	0	0
2021/04/25 14:22:57	小学/三年级	3	0	9	0	1	0	1	3	0	1	1
2021/04/25 14:23:59	小学/三年级	3	1	10	0	1	1	1	2	1	0	0
2021/04/25 14:24:24	小学/三年级	3	1	9	0	2	1	2	2	1	0	0
2021/04/25 14:24:19	小学/三年级	3	1	9	0	2	2	1	3	0	0	0
2021/04/25 14:23:02	小学/三年级	3	1	9	1	2	1	1	3	0	0	0
2021/04/25 14:23:48	小学/三年级	3	1	9	0	1	1	1	2	1	0	1
2021/04/25 14:24:15	小学/三年级	3	1	9	0	2	2	2	2	1	0	0
2021/04/25 14:23:54	小学/三年级	3	1	9	0	1	1	2	2	1	0	0
2021/04/25 14:22:00	小学/三年级	3	0	10	0	0	0	1	2	4	0	1
2021/04/25 14:23:57	小学/三年级	3	1	9	0	1	1	1	2	1	1	0
2021/04/25 14:24:25	小学/三年级	3	1	9	0	2	1	2	2	1	1	0
2021/04/25 14:24:06	小学/三年级	3	1	9	0	2	2	1	3	0	0	0
2021/04/25 14:21:10	小学/三年级	3	0	9	0	2	1	1	2	4	0	0
2021/04/25 14:22:33	小学/三年级	3	1	10	0	2	1	0	1	4	1	0
2021/04/25 14:23:35	小学/三年级	3	0	10	0	1	2	1	2	2	0	0
2021/04/25 14:21:49	小学/三年级	3	1	10	0	1	0	2	2	3	0	0
2021/04/25 14:23:41	小学/三年级	3	1	10	0	1	0	1	3	0	0	0
2021/04/25 14:22:57	小学/三年级	3	0	10	1	2	1	2	2	1	1	0
2021/04/25 14:25:23	小学/三年级	3	0	9	1	1	0	2	0	1	0	0
2021/04/25 14:24:11	小学/三年级	3	1	10	0	1	1	1	2	1	0	0
2021/04/25 14:20:32	小学/三年级	3	0	9	0	1	1	2	2	4	0	0
2021/04/25 14:21:04	小学/三年级	3	0	9	1	2	1	1	3	0	0	0
2021/04/25 14:23:12	小学/三年级	3	0	9	0	2	1	1	2	1	0	0
2021/04/25 14:19:47	小学/三年级	3	0	9	0	1	1	1	1	1	0	0
2021/04/13 16:10:29	小学/三年级/三年级五班	3	0	10	0	2	1	2	3	0	1	0
2021/04/13 16:11:06	小学/三年级/三年级五班	3	1	10	0	1	2	2	2	1	0	0
2021/04/13 15:48:18	小学/三年级/三年级二班	3	0	9	0	2	2	2	2	4	0	0
2021/04/13 11:59:45	小学/三年级/三年级三班	3	1	10	0	2	2	1	2	4	0	0
2021/04/13 11:59:31	小学/三年级/三年级三班	3	0	9	0	2	2	2	3	0	0	0
2021/04/13 11:59:13	小学/三年级/三年级三班	3	1	9	1	1	1	1	3	0	0	0
2021/04/13 11:55:20	小学/三年级/三年级三班	3	1	10	0	2	0	1	3	0	0	0
2021/04/13 11:53:31	小学/三年级/三年级三班	3	1	10	1	2	1	2	3	0	0	0
2021/04/13 11:52:45	小学/三年级/三年级三班	3	0	9	1	1	1	1	0	1	1	1
2021/04/13 11:52:10	小学/三年级/三年级三班	3	0	10	0	2	2	2	0	1	0	1
2021/04/13 11:53:38	小学/三年级/三年级三班	3	1	9	0	2	0	2	2	1	0	0
2021/04/13 11:53:25	小学/三年级/三年级三班	3	1	9	1	2	2	1	2	1	0	0
2021/04/13 11:52:08	小学/三年级/三年级三班	3	0	9	0	2	1	2	0	1	0	1
2021/04/13 11:51:26	小学/三年级/三年级三班	3	1	9	0	2	1	1	3	0	0	0
2021/04/13 11:54:31	小学/三年级/三年级三班	3	1	9	1	2	2	1	3	0	0	0
2021/04/13 11:52:46	小学/三年级/三年级三班	3	1	9	0	2	2	2	2	4	0	0
2021/04/13 11:50:31	小学/三年级/三年级三班	3	0	9	1	2	1	2	1	3	0	1
2021/04/13 11:54:15	小学/三年级/三年级三班	3	1	10	0	2	2	2	2	2	0	0
2021/04/13 11:51:00	小学/三年级/三年级三班	3	0	9	0	2	2	1	3	0	0	0
2021/04/13 11:54:04	小学/三年级/三年级三班	3	1	9	0	2	1	1	3	0	0	0
2021/04/13 11:54:04	小学/三年级/三年级三班	3	1	9	0	2	1	1	3	0	0	0
2021/04/13 11:53:22	小学/三年级/三年级三班	3	1	9	0	2	2	1	3	0	0	0
2021/04/13 11:50:36	小学/三年级/三年级三班	3	0	10	1	2	2	1	2	1	0	0
2021/04/13 11:51:30	小学/三年级/三年级三班	3	1	9	0	2	2	1	3	0	0	0
2021/04/13 11:51:30	小学/三年级/三年级三班	3	1	9	0	2	2	1	0	4	0	0
2021/04/13 11:51:38	小学/三年级/三年级三班	3	1	9	0	2	1	1	1	2	0	0
2021/04/13 11:53:49	小学/三年级/三年级三班	3	0	9	1	1	2	2	2	1	0	1
2021/04/13 11:51:39	小学/三年级/三年级三班	3	1	9	0	2	1	2	2	1	1	1
2021/04/13 11:49:24	小学/三年级/三年级三班	3	1	10	0	2	2	2	3	0	0	0
2021/04/13 11:52:01	小学/三年级/三年级三班	3	0	9	1	0	1	0	2	1	0	1
2021/04/13 11:49:06	小学/三年级/三年级三班	3	1	9	0	1	2	2	3	0	0	1
2021/04/13 11:49:05	小学/三年级/三年级三班	3	1	9	0	2	1	2	2	1	1	1
2021/04/13 11:48:07	小学/三年级/三年级三班	3	0	9	0	1	1	1	2	4	0	0
2021/04/13 11:47:55	小学/三年级/三年级三班	3	0	10	1	2	2	2	3	0	0	0
2021/04/13 11:48:52	小学/三年级/三年级三班	3	0	10	1	2	1	1	2	3	0	0
2021/04/13 11:48:48	小学/三年级/三年级三班	3	0	9	1	2	1	2	2	4	0	0
2021/04/13 11:48:27	小学/三年级/三年级三班	3	0	9	0	0	1	0	2	1	0	0
2021/04/13 11:47:58	小学/三年级/三年级三班	3	0	9	0	2	2	2	3	0	0	0
2021/04/13 11:48:10	小学/三年级/三年级三班	3	0	9	0	2	2	2	3	0	0	0
2021/04/13 11:51:36	小学/三年级/三年级三班	3	1	9	0	2	2	2	2	4	0	1
2021/04/13 11:51:44	小学/三年级/三年级三班	3	0	10	0	1	1	1	2	2	0	0
2021/04/13 11:50:12	小学/三年级/三年级三班	3	1	9	0	2	1	1	3	0	0	0
2021/04/13 11:47:24	小学/三年级/三年级三班	3	0	9	0	2	0	2	0	1	0	1
2021/04/13 11:44:32	小学/三年级/三年级三班	3	0	10	0	1	1	2	1	3	1	1
2021/04/13 11:44:59	小学/三年级/三年级三班	3	0	10	0	2	1	2	2	1	0	0
2021/04/13 11:46:32	小学/三年级/三年级三班	3	0	10	0	1	2	0	3	0	0	1
2021/04/13 11:47:20	小学/三年级/三年级三班	3	1	10	0	2	1	1	2	1	0	0
2021/04/13 11:44:34	小学/三年级/三年级三班	3	1	9	0	2	2	2	3	0	0	0
2021/04/13 11:48:38	小学/三年级/三年级三班	3	1	10	1	2	2	1	3	0	0	0
2021/04/13 11:37:54	小学/三年级/三年级六班	3	1	9	1	1	2	1	3	0	0	0
2021/04/13 11:35:45	小学/三年级/三年级六班	3	0	9	0	1	1	2	3	0	1	0
2021/04/13 11:35:52	小学/三年级/三年级六班	3	1	9	0	2	2	2	2	1	0	0
2021/04/13 11:34:54	小学/三年级/三年级六班	3	1	9	0	2	2	2	0	1	0	0
2021/04/13 11:34:07	小学/三年级/三年级六班	3	0	9	0	2	1	2	3	0	0	0
2021/04/13 11:32:00	小学/三年级/三年级六班	3	1	10	0	2	2	1	3	0	0	0
2021/04/13 11:30:02	小学/三年级/三年级六班	3	1	9	0	2	2	2	2	1	0	0
2021/04/13 11:28:03	小学/三年级/三年级六班	3	0	10	0	2	2	1	2	2	0	0
2021/04/13 11:28:06	小学/三年级/三年级六班	3	0	9	0	1	1	2	1	1	1	1
2021/04/13 11:28:00	小学/三年级/三年级二班	3	0	10	0	2	2	1	3	0	0	0
2021/04/13 11:29:11	小学/三年级/三年级六班	3	1	9	0	2	2	2	3	0	0	0
2021/04/13 11:28:42	小学/三年级/三年级六班	3	1	9	0	2	2	1	3	0	0	0
2021/04/13 11:30:31	小学/三年级/三年级六班	3	1	10	0	2	1	2	3	0	0	0
2021/04/13 11:28:03	小学/三年级/三年级六班	3	1	10	0	2	1	2	2	4	1	1
2021/04/13 11:27:32	小学/三年级/三年级二班	3	1	10	0	1	1	2	2	4	0	0
2021/04/13 11:27:41	小学/三年级/三年级二班	3	0	10	1	1	1	1	1	1	0	0
2021/04/13 11:29:11	小学/三年级/三年级六班	3	1	10	0	2	2	1	3	0	0	0
2021/04/13 11:30:51	小学/三年级/三年级六班	3	1	9	0	2	2	1	3	0	0	0
2021/04/13 11:27:49	小学/三年级/三年级六班	3	0	10	0	2	2	2	2	1	0	0
2021/04/13 11:27:50	小学/三年级/三年级六班	3	0	9	0	2	2	2	2	1	0	0
2021/04/13 11:24:38	小学/三年级/三年级六班	3	0	9	1	1	2	2	2	1	0	1
2021/04/13 11:27:13	小学/三年级/三年级六班	3	0	10	0	2	1	2	3	0	0	0
2021/04/13 11:25:01	小学/三年级/三年级二班	3	0	9	0	1	0	1	2	1	0	1
2021/04/13 11:27:30	小学/三年级/三年级六班	3	1	9	0	1	1	2	1	1	1	1
2021/04/13 11:26:48	小学/三年级/三年级六班	3	1	9	0	1	1	1	2	1	1	1
2021/04/13 11:25:33	小学/三年级/三年级六班	3	0	9	0	2	2	1	2	2	0	0
2021/04/13 11:25:20	小学/三年级/三年级六班	3	0	9	0	2	2	1	3	0	0	0
2021/04/13 11:25:17	小学/三年级/三年级六班	3	1	9	0	2	1	2	2	2	0	0
2021/04/13 11:24:29	小学/三年级/三年级二班	3	1	9	1	1	1	1	0	3	1	1
2021/04/13 11:25:34	小学/三年级/三年级六班	3	1	10	0	2	1	1	3	0	1	0
2021/04/13 11:25:40	小学/三年级/三年级六班	3	0	9	0	2	1	1	3	0	0	0
2021/04/13 11:23:33	小学/三年级/三年级二班	3	1	10	1	2	1	2	3	0	0	0
2021/04/13 11:25:12	小学/三年级/三年级六班	3	0	10	0	2	2	1	2	1	0	0
2021/04/13 11:24:43	小学/三年级/三年级二班	3	1	9	1	2	1	1	2	4	0	0
2021/04/13 11:29:26	小学/三年级/三年级二班	3	0	9	0	2	1	1	2	1	0	0
2021/04/13 11:24:41	小学/三年级/三年级六班	3	0	9	1	2	2	1	3	0	0	1
2021/04/13 11:25:41	小学/三年级/三年级六班	3	0	9	0	2	2	1	3	0	0	0
2021/04/13 11:23:02	小学/三年级/三年级六班	3	0	10	0	2	1	2	1	3	1	0
2021/04/13 11:24:11	小学/三年级/三年级二班	3	1	9	1	1	1	2	2	2	0	0
2021/04/13 11:26:36	小学/三年级/三年级六班	3	1	9	1	2	2	2	3	0	0	0
2021/04/13 11:23:22	小学/三年级/三年级六班	3	0	9	0	2	1	1	3	0	0	0
2021/04/13 11:25:57	小学/三年级/三年级二班	3	0	9	0	2	2	1	3	0	1	1
2021/04/13 11:25:31	小学/三年级/三年级六班	3	1	10	0	2	2	1	3	0	0	0
2021/04/13 11:25:56	小学/三年级/三年级二班	3	1	9	0	2	2	1	2	2	1	1
2021/04/13 11:24:14	小学/三年级/三年级二班	3	0	9	0	2	0	2	2	2	0	0
2021/04/13 11:22:50	小学/三年级/三年级二班	3	1	9	0	2	1	1	0	1	0	0
2021/04/13 11:23:38	小学/三年级/三年级六班	3	1	9	1	2	1	1	2	1	0	1
2021/04/13 11:23:39	小学/三年级/三年级六班	3	1	10	1	2	1	2	3	0	0	0
2021/04/13 11:23:42	小学/三年级/三年级二班	3	1	10	1	1	0	1	2	1	0	0
2021/04/13 11:23:31	小学/三年级/三年级二班	3	0	10	0	2	0	1	2	1	0	0
2021/04/13 11:22:08	小学/三年级/三年级六班	3	0	10	1	2	2	2	3	0	0	0
2021/04/13 11:26:01	小学/三年级/三年级二班	3	1	9	0	2	1	1	3	0	0	1
2021/04/13 11:23:49	小学/三年级/三年级二班	3	1	10	0	2	1	1	2	4	0	0
2021/04/13 11:25:20	小学/三年级/三年级二班	3	1	9	0	1	1	1	2	2	0	0
2021/04/13 11:23:28	小学/三年级/三年级二班	3	1	9	1	1	2	1	3	0	0	0
2021/04/13 11:21:05	小学/三年级/三年级二班	3	0	10	0	2	1	1	2	1	1	0
2021/04/13 11:25:45	小学/三年级/三年级六班	3	0	10	0	2	2	2	2	1	0	0
2021/04/13 11:21:28	小学/三年级/三年级二班	3	0	9	0	2	1	0	0	4	0	0
2021/04/13 11:24:29	小学/三年级/三年级二班	3	1	10	0	2	1	1	2	2	0	0
2021/04/13 11:22:09	小学/三年级/三年级二班	3	0	10	0	2	2	0	2	4	0	0
2021/04/13 11:22:25	小学/三年级/三年级二班	3	0	10	0	1	2	0	1	1	0	0
2021/04/13 11:23:32	小学/三年级/三年级六班	3	1	9	1	2	2	1	2	4	0	0
2021/04/13 11:23:16	小学/三年级/三年级二班	3	1	10	0	1	1	1	3	0	0	0
2021/04/13 11:23:08	小学/三年级/三年级六班	3	1	9	1	1	1	1	3	0	0	0
2021/04/13 11:23:22	小学/三年级/三年级二班	3	0	9	0	1	2	1	1	3	0	0
2021/04/13 11:23:01	小学/三年级/三年级二班	3	0	10	0	2	2	1	1	1	1	0
2021/04/13 11:22:58	小学/三年级/三年级二班	3	1	10	0	2	2	1	2	1	0	0
2021/04/13 11:26:42	小学/三年级/三年级二班	3	0	9	1	1	1	1	2	3	0	0
2021/04/13 11:23:00	小学/三年级/三年级二班	3	1	9	0	0	0	0	3	0	0	0
2021/04/13 11:22:32	小学/三年级/三年级六班	3	1	10	0	2	2	2	3	0	0	0
2021/04/13 11:22:39	小学/三年级/三年级二班	3	1	9	0	2	1	1	2	1	0	0
2021/04/13 11:20:12	小学/三年级/三年级二班	3	0	10	0	1	1	1	2	1	0	0
2021/04/13 11:23:36	小学/三年级/三年级二班	3	1	10	1	1	2	2	3	0	0	0
2021/04/13 11:22:53	小学/三年级/三年级二班	3	1	9	1	1	1	1	2	4	0	0
2021/04/13 11:19:48	小学/三年级/三年级二班	3	0	10	0	2	2	1	2	1	0	0
2021/04/13 11:26:12	小学/三年级/三年级二班	3	0	10	0	1	2	2	2	2	0	0
2021/04/13 11:19:12	小学/三年级/三年级六班	3	0	10	1	1	0	1	2	1	1	1
2021/04/13 11:21:56	小学/三年级/三年级二班	3	1	10	0	2	1	1	3	0	0	0
2021/04/13 11:21:55	小学/三年级/三年级二班	3	1	9	0	2	1	1	3	0	0	0
2021/04/13 11:18:08	小学/三年级/三年级二班	3	0	9	1	1	1	0	2	4	1	0
2021/04/13 11:17:25	小学/三年级/三年级二班	3	0	10	0	2	2	1	3	0	0	0
2021/04/13 11:11:22	小学/三年级/三年级五班	3	1	10	0	2	2	2	3	0	0	0
2021/04/13 11:07:12	小学/三年级/三年级五班	3	1	9	0	2	2	2	3	0	0	0
2021/04/13 11:09:17	小学/三年级/三年级五班	3	1	10	1	2	2	2	3	0	0	0
2021/04/13 11:06:58	小学/三年级/三年级五班	3	1	9	0	2	2	2	3	0	0	0
2021/04/13 11:06:22	小学/三年级/三年级五班	3	0	10	0	2	1	1	2	2	0	0
2021/04/13 11:05:57	小学/三年级/三年级五班	3	0	9	0	2	1	2	2	3	1	0
2021/04/13 11:04:56	小学/三年级/三年级五班	3	0	9	1	1	1	2	2	4	0	0
2021/04/13 11:04:54	小学/三年级/三年级五班	3	1	9	0	2	0	0	3	0	1	1
2021/04/13 11:04:24	小学/三年级/三年级五班	3	1	9	0	2	0	2	3	0	0	0
2021/04/13 11:01:10	小学/三年级/三年级五班	3	0	9	0	1	1	1	2	1	0	0
2021/04/13 11:01:22	小学/三年级/三年级五班	3	1	9	0	1	1	1	2	4	0	1
2021/04/13 11:01:40	小学/三年级/三年级五班	3	1	10	0	1	0	1	2	1	1	1
2021/04/13 11:00:45	小学/三年级/三年级五班	3	1	10	0	1	2	1	2	1	0	0
2021/04/13 11:02:52	小学/三年级/三年级五班	3	1	10	0	2	2	2	2	3	0	0
2021/04/13 11:00:05	小学/三年级/三年级五班	3	1	10	0	2	1	1	3	0	0	0
2021/04/13 10:58:52	小学/三年级/三年级五班	3	1	10	1	2	1	2	3	0	0	0
2021/04/13 11:04:47	小学/三年级/三年级五班	3	1	9	0	2	2	1	3	0	0	0
2021/04/13 10:57:17	小学/三年级/三年级五班	3	0	9	0	2	2	2	0	3	1	0
2021/04/13 11:00:10	小学/三年级/三年级五班	3	1	10	1	2	2	2	3	0	0	0
2021/04/13 11:00:04	小学/三年级/三年级五班	3	1	9	0	2	2	2	2	4	0	0
2021/04/13 10:58:37	小学/三年级/三年级五班	3	1	9	0	1	1	1	2	2	0	0
2021/04/13 10:55:51	小学/三年级/三年级五班	3	0	9	0	2	2	1	0	1	0	0
2021/04/13 10:58:40	小学/三年级/三年级五班	3	1	9	1	2	0	1	2	1	0	1
2021/04/13 10:55:59	小学/三年级/三年级五班	3	0	10	1	2	2	1	3	0	0	0
2021/04/13 10:56:57	小学/三年级/三年级五班	3	0	9	0	2	2	1	3	0	0	0
2021/04/13 10:57:37	小学/三年级/三年级五班	3	0	10	1	2	2	2	3	0	0	0
2021/04/13 10:59:00	小学/三年级/三年级五班	3	1	9	1	2	1	1	2	1	0	0
2021/04/13 10:55:23	小学/三年级/三年级五班	3	0	9	0	1	2	1	3	0	0	1
2021/04/13 10:58:21	小学/三年级/三年级五班	3	1	9	0	2	2	2	3	0	0	0
2021/04/13 10:56:41	小学/三年级/三年级五班	3	1	10	1	1	1	2	2	1	1	1
2021/04/13 10:54:46	小学/三年级/三年级五班	3	1	9	0	2	0	2	3	0	0	0
2021/04/13 10:58:48	小学/三年级/三年级五班	3	1	9	0	2	1	2	3	0	0	0
2021/04/13 10:55:14	小学/三年级/三年级五班	3	1	10	0	2	1	1	2	2	0	0
2021/04/13 10:55:22	小学/三年级/三年级五班	3	0	9	0	1	2	2	3	0	0	0
2021/04/13 10:53:31	小学/三年级/三年级五班	3	0	10	0	2	1	2	3	0	0	0
2021/04/13 10:52:16	小学/三年级/三年级五班	3	0	10	0	1	0	2	2	1	0	1
2021/04/13 10:54:10	小学/三年级/三年级五班	3	0	10	1	2	1	2	3	0	1	0
2021/04/13 10:52:05	小学/三年级/三年级五班	3	0	10	0	2	1	2	3	0	0	0
2021/04/13 10:44:25	小学/三年级/三年级一班	3	0	9	0	1	1	1	2	1	0	0
2021/04/13 10:42:12	小学/三年级/三年级一班	3	0	10	0	2	1	2	3	0	0	0
2021/04/13 10:42:10	小学/三年级/三年级一班	3	1	9	0	2	2	0	3	0	0	0
2021/04/13 10:41:06	小学/三年级/三年级一班	3	1	9	1	1	2	2	2	4	0	0
2021/04/13 10:40:11	小学/三年级/三年级一班	3	1	9	1	1	1	1	1	3	0	1
2021/04/13 10:40:40	小学/三年级/三年级一班	3	1	10	1	2	2	1	2	3	0	0
2021/04/13 10:39:26	小学/三年级/三年级一班	3	1	9	0	2	2	2	1	1	0	0
2021/04/13 10:38:29	小学/三年级/三年级一班	3	0	10	0	2	2	1	3	0	0	0
2021/04/13 10:36:40	小学/三年级/三年级一班	3	0	9	0	1	0	2	1	1	1	1
2021/04/13 10:36:06	小学/三年级/三年级一班	3	1	10	0	1	1	1	2	1	0	0
2021/04/13 10:38:37	小学/三年级/三年级一班	3	1	9	1	1	2	1	2	1	0	0
2021/04/13 10:35:00	小学/三年级/三年级一班	3	1	9	0	2	1	2	3	0	0	0
2021/04/13 10:34:24	小学/三年级/三年级一班	3	1	9	1	1	2	2	3	0	0	0
2021/04/13 10:36:33	小学/三年级/三年级一班	3	1	10	1	2	2	2	3	0	0	0
2021/04/13 10:38:37	小学/三年级/三年级一班	3	1	10	0	1	1	1	2	2	0	0
2021/04/13 10:34:24	小学/三年级/三年级一班	3	0	9	0	2	1	2	2	1	0	0
2021/04/13 10:35:24	小学/三年级/三年级一班	3	0	9	0	2	0	1	0	1	0	1
2021/04/13 10:37:13	小学/三年级/三年级一班	3	0	9	0	2	0	1	3	0	0	1
2021/04/13 10:36:50	小学/三年级/三年级一班	3	0	9	0	2	1	2	2	2	0	0
2021/04/13 10:37:22	小学/三年级/三年级一班	3	0	9	1	1	2	1	2	2	1	1
2021/04/13 10:36:31	小学/三年级/三年级一班	3	1	9	0	1	1	2	2	1	0	0
2021/04/13 10:37:03	小学/三年级/三年级一班	3	0	9	1	2	2	2	2	1	0	0
2021/04/13 10:37:04	小学/三年级/三年级一班	3	1	10	0	2	1	1	2	3	0	0
2021/04/13 10:32:35	小学/三年级/三年级一班	3	0	9	0	0	2	2	2	1	0	1
2021/04/13 10:32:14	小学/三年级/三年级一班	3	0	9	1	1	1	1	2	2	0	0
2021/04/13 10:33:07	小学/三年级/三年级一班	3	1	9	0	2	2	2	0	1	0	0
2021/04/13 10:35:00	小学/三年级/三年级一班	3	0	9	0	2	2	0	1	2	0	1
2021/04/13 10:35:35	小学/三年级/三年级一班	3	1	9	0	1	2	1	2	1	0	0
2021/04/13 10:38:35	小学/三年级/三年级一班	3	1	9	1	1	1	1	2	2	0	0
2021/04/13 10:36:31	小学/三年级/三年级一班	3	0	10	0	2	1	2	3	0	0	0
2021/04/13 10:36:54	小学/三年级/三年级一班	3	1	9	0	2	2	2	2	1	0	0
2021/04/13 10:32:36	小学/三年级/三年级一班	3	1	9	0	2	1	2	3	0	0	0
2021/04/13 10:32:59	小学/三年级/三年级一班	3	0	9	0	1	1	2	2	1	0	0
2021/04/13 10:34:43	小学/三年级/三年级一班	3	0	10	0	2	2	0	3	0	0	0
2021/04/13 10:35:09	小学/三年级/三年级一班	3	1	9	0	2	2	2	3	0	0	0
2021/04/13 10:30:41	小学/三年级/三年级一班	3	1	10	0	2	1	1	2	1	0	0
2021/04/13 10:30:47	小学/三年级/三年级一班	3	0	9	0	2	2	2	2	4	0	0
2021/04/13 10:31:54	小学/三年级/三年级一班	3	0	10	0	1	1	0	2	1	0	0
2021/04/13 10:31:43	小学/三年级/三年级一班	3	0	10	0	2	1	1	3	0	0	0
2021/04/13 10:32:42	小学/三年级/三年级一班	3	1	10	0	2	1	1	3	0	0	0
2021/04/13 10:31:26	小学/三年级/三年级一班	3	1	10	1	1	1	2	2	1	0	0
2021/04/13 10:35:10	小学/三年级/三年级一班	3	1	10	0	2	0	0	3	0	0	0
2021/04/13 10:29:31	小学/三年级/三年级一班	3	0	9	0	2	1	1	3	0	0	0
2021/04/13 10:30:35	小学/三年级/三年级一班	3	1	10	0	2	2	2	3	0	0	0
2021/04/13 10:29:51	小学/三年级/三年级一班	3	0	10	0	2	2	2	3	0	0	0
2021/04/13 10:30:03	小学/三年级/三年级一班	3	1	10	0	2	1	1	2	1	0	0
2021/04/13 10:24:48	小学/三年级/三年级四班	3	1	9	0	2	1	2	3	0	0	0
2021/04/13 10:21:45	小学/三年级/三年级四班	3	0	9	1	2	1	1	3	0	0	0
2021/04/13 10:20:47	小学/三年级/三年级四班	3	0	10	1	2	2	2	2	1	1	0
2021/04/13 10:21:50	小学/三年级/三年级四班	3	1	9	0	2	2	2	2	4	0	0
2021/04/13 10:21:13	小学/三年级/三年级四班	3	1	10	1	1	2	1	0	1	0	0
2021/04/13 10:20:21	小学/三年级/三年级四班	3	1	10	1	2	2	1	3	0	0	0
2021/04/13 10:20:26	小学/三年级/三年级四班	3	0	10	0	2	0	2	3	0	0	0
2021/04/13 10:20:09	小学/三年级/三年级四班	3	1	9	1	2	2	2	3	0	0	0
2021/04/13 10:20:08	小学/三年级/三年级四班	3	0	10	1	1	1	0	2	1	0	0
2021/04/13 10:20:29	小学/三年级/三年级四班	3	1	10	1	1	1	0	3	0	0	1
2021/04/13 10:19:29	小学/三年级/三年级四班	3	0	9	0	2	0	2	3	0	0	0
2021/04/13 10:18:37	小学/三年级/三年级四班	3	0	9	1	2	1	2	2	2	1	0
2021/04/13 10:17:56	小学/三年级/三年级四班	3	0	10	0	1	1	1	3	0	0	0
2021/04/13 10:17:53	小学/三年级/三年级四班	3	0	9	0	2	1	2	0	1	1	0
2021/04/13 10:17:44	小学/三年级/三年级四班	3	1	9	0	1	1	1	3	0	0	0
2021/04/13 10:17:01	小学/三年级/三年级四班	3	0	9	0	1	2	2	1	1	0	0
2021/04/13 10:19:08	小学/三年级/三年级四班	3	1	10	0	2	1	1	2	1	0	1
2021/04/13 10:19:04	小学/三年级/三年级四班	3	1	9	0	2	1	1	2	1	0	0
2021/04/13 10:17:18	小学/三年级/三年级四班	3	0	9	1	1	2	1	0	4	0	0
2021/04/13 10:19:08	小学/三年级/三年级四班	3	1	10	0	2	1	1	3	0	1	1
2021/04/13 10:16:43	小学/三年级/三年级四班	3	0	9	0	1	2	1	2	2	0	0
2021/04/13 10:17:40	小学/三年级/三年级四班	3	0	9	1	1	2	1	2	4	0	0
2021/04/13 10:18:10	小学/三年级/三年级四班	3	1	9	1	1	1	2	2	3	1	1
2021/04/13 10:17:52	小学/三年级/三年级四班	3	1	9	0	2	1	1	3	0	0	0
2021/04/13 10:17:46	小学/三年级/三年级四班	3	0	9	0	1	1	1	0	4	1	0
2021/04/13 10:19:04	小学/三年级/三年级四班	3	1	9	0	1	1	0	3	0	1	0
2021/04/13 10:18:25	小学/三年级/三年级四班	3	1	9	0	2	1	1	2	4	0	0
2021/04/13 10:16:42	小学/三年级/三年级四班	3	0	10	1	2	2	1	1	1	0	0
2021/04/13 10:17:30	小学/三年级/三年级四班	3	0	10	0	2	2	2	3	0	0	0
2021/04/13 10:20:01	小学/三年级/三年级四班	3	0	10	0	1	1	1	2	4	1	1
2021/04/13 10:21:14	小学/三年级/三年级四班	3	0	10	0	1	1	2	2	4	0	0
2021/04/13 10:16:29	小学/三年级/三年级四班	3	1	9	0	2	2	2	2	4	0	0
2021/04/13 10:15:40	小学/三年级/三年级四班	3	0	9	1	2	2	1	3	0	0	0
2021/04/13 10:16:14	小学/三年级/三年级四班	3	1	10	0	1	2	1	2	1	0	1
2021/04/13 10:15:27	小学/三年级/三年级四班	3	0	9	0	1	2	2	1	1	1	1
2021/04/13 10:17:26	小学/三年级/三年级四班	3	1	9	0	2	1	1	3	0	0	0
2021/04/13 10:17:41	小学/三年级/三年级四班	3	1	9	0	1	2	1	0	2	0	1
2021/04/13 10:18:07	小学/三年级/三年级四班	3	1	9	0	1	2	1	2	2	0	0
2021/04/13 10:16:58	小学/三年级/三年级四班	3	1	9	1	2	1	2	2	2	0	0
2021/04/13 10:15:42	小学/三年级/三年级四班	3	0	9	0	2	1	2	2	2	0	0
2021/04/13 10:20:06	小学/三年级/三年级四班	3	1	10	1	2	2	2	3	0	0	0
2021/04/13 10:11:07	小学/三年级/三年级四班	3	1	9	0	2	0	2	3	0	0	1
2021/04/13 11:19:11	小学/三年级/三年级六班	3	0	9	1	2	1	2	2	1	0	0
2021/04/28 10:26:20	小学/三年级/三年级三班	3	1	10	1	1	1	2	2	2	1	0
2021/04/28 10:21:25	小学/三年级/三年级三班	3	0	10	1	2	2	2	2	4	1	0
2021/04/28 10:20:15	小学/三年级/三年级三班	3	0	10	0	2	1	1	2	1	0	0
2021/04/28 10:20:08	小学/三年级/三年级三班	3	0	9	0	1	1	1	2	2	0	0
2021/04/28 10:18:33	小学/三年级/三年级三班	3	1	9	0	2	2	2	3	0	0	0
2021/04/28 10:19:58	小学/三年级/三年级三班	3	0	9	0	1	2	1	3	0	0	0
2021/04/28 10:19:13	小学/三年级/三年级三班	3	0	9	0	2	2	2	2	2	0	1
2021/04/28 10:18:17	小学/三年级/三年级三班	3	1	10	0	2	2	2	3	0	0	0
2021/04/28 10:17:17	小学/三年级/三年级三班	3	0	9	0	2	2	2	2	1	0	0
2021/04/28 10:17:03	小学/三年级/三年级三班	3	0	10	0	2	2	1	3	0	0	1
2021/04/28 10:16:32	小学/三年级/三年级三班	3	1	9	0	2	1	1	3	0	0	0
2021/04/28 10:21:37	小学/三年级/三年级三班	3	0	10	0	2	1	1	3	0	0	0
2021/04/28 10:14:36	小学/三年级/三年级三班	3	0	9	0	1	2	1	2	1	0	1
2021/04/28 10:16:23	小学/三年级/三年级三班	3	0	9	0	2	2	1	2	1	0	0
2021/04/28 10:12:56	小学/三年级/三年级三班	3	1	9	0	2	2	2	3	0	0	0
2021/04/28 10:13:07	小学/三年级/三年级三班	3	0	9	0	2	2	2	3	0	0	0
2021/04/28 10:16:18	小学/三年级/三年级三班	3	1	9	0	2	2	2	3	0	0	0
2021/04/28 10:14:25	小学/三年级/三年级三班	3	1	9	0	2	1	2	3	0	1	0
2021/04/28 10:13:42	小学/三年级/三年级三班	3	0	10	0	2	2	1	2	3	0	0
2021/04/28 10:12:23	小学/三年级/三年级三班	3	0	9	0	2	2	2	3	0	0	0
2021/04/28 10:18:17	小学/三年级/三年级三班	3	0	9	0	1	2	2	2	4	1	1
2021/04/28 10:14:17	小学/三年级/三年级三班	3	0	9	0	2	1	1	3	0	0	0
2021/04/28 10:13:42	小学/三年级/三年级三班	3	1	9	0	1	1	1	2	4	1	1
2021/04/28 10:12:54	小学/三年级/三年级三班	3	0	9	0	2	2	1	3	0	0	0
2021/04/28 10:17:24	小学/三年级/三年级三班	3	1	9	0	2	2	2	2	2	0	0
2021/04/28 10:13:52	小学/三年级/三年级三班	3	1	10	0	1	1	0	1	1	1	1
2021/04/28 10:12:24	小学/三年级/三年级三班	3	1	9	0	2	2	2	2	4	0	0
2021/04/28 10:09:08	小学/三年级/三年级三班	3	0	10	0	1	2	2	2	4	0	0
2021/04/28 10:11:20	小学/三年级/三年级三班	3	0	9	0	2	2	2	2	1	0	0
2021/04/28 10:11:04	小学/三年级/三年级三班	3	0	9	0	2	2	2	3	0	0	0
2021/04/28 10:08:51	小学/三年级/三年级三班	3	0	10	0	2	1	1	3	0	0	0
2021/04/28 10:08:34	小学/三年级/三年级三班	3	0	10	0	2	2	1	3	0	0	0
2021/04/28 10:08:06	小学/三年级/三年级三班	3	0	10	0	2	2	2	3	0	0	0
2021/04/28 10:10:40	小学/三年级/三年级三班	3	1	9	0	2	2	2	2	2	0	0
2021/04/28 10:10:51	小学/三年级/三年级三班	3	1	9	0	2	2	2	2	4	0	0
2021/04/28 10:11:40	小学/三年级/三年级三班	3	0	10	0	2	1	1	2	2	0	0
2021/04/28 10:06:04	小学/三年级/三年级三班	3	0	10	0	2	2	2	3	0	0	0
2021/04/28 09:20:09	小学/三年级	3	0	9	0	2	2	2	3	0	0	0
2021/04/28 09:19:17	小学/三年级	3	1	10	0	2	2	2	2	1	0	0
2021/04/28 09:18:10	小学/三年级	3	0	10	0	2	1	1	2	1	0	0
2021/04/28 09:17:08	小学/三年级	3	0	9	0	2	2	2	3	0	0	0
2021/04/28 09:17:22	小学/三年级	3	1	10	0	1	2	1	3	0	0	0
2021/04/28 09:15:05	小学/三年级	3	0	10	0	2	2	1	2	1	0	0
2021/04/28 09:15:56	小学/三年级	3	0	10	0	2	2	2	3	0	0	0
2021/04/28 09:13:47	小学/三年级	3	0	9	0	2	2	2	3	0	0	0
2021/04/28 09:14:14	小学/三年级	3	0	10	0	1	2	1	2	2	0	0
2021/04/28 09:13:51	小学/三年级	3	0	10	0	2	0	1	3	0	0	0
2021/04/28 09:18:37	小学/三年级	3	1	9	0	2	2	2	3	0	0	0
2021/04/28 09:14:07	小学/三年级	3	1	9	0	2	2	2	3	0	0	0
2021/04/28 09:12:43	小学/三年级	3	0	10	0	1	1	2	2	1	0	0
2021/04/28 09:15:22	小学/三年级	3	1	9	0	2	2	2	3	0	0	0
2021/04/28 09:13:20	小学/三年级	3	0	9	0	1	1	0	2	4	0	0
2021/04/28 09:12:29	小学/三年级	3	0	10	0	1	1	1	2	1	0	1
2021/04/28 09:19:25	小学/三年级	3	1	10	1	1	1	0	2	1	0	0
2021/04/28 09:12:40	小学/三年级	3	0	9	0	2	2	2	3	0	0	0
2021/04/28 09:13:29	小学/三年级	3	1	9	0	2	1	2	3	0	0	0
2021/04/28 09:12:24	小学/三年级	3	1	9	0	2	2	2	3	0	0	0
2021/04/28 09:16:07	小学/三年级	3	0	9	0	2	2	1	3	0	0	0
2021/04/28 09:12:04	小学/三年级	3	1	9	0	2	2	2	3	0	0	0
2021/04/28 09:12:17	小学/三年级	3	0	10	0	0	1	2	1	2	1	1
2021/04/28 09:12:15	小学/三年级	3	0	9	0	2	1	1	3	0	0	0
2021/04/28 09:13:35	小学/三年级	3	1	9	0	2	2	2	2	1	0	0
2021/04/28 09:13:49	小学/三年级	3	1	9	0	2	2	2	2	1	0	0
2021/04/28 09:11:51	小学/三年级	3	0	9	0	2	1	1	2	3	1	1
2021/04/28 09:11:50	小学/三年级	3	0	9	0	1	1	1	2	3	0	0
2021/04/28 09:13:59	小学/三年级	3	0	9	0	1	2	2	2	4	0	0
2021/04/28 09:11:35	小学/三年级	3	0	9	0	1	2	1	3	0	0	0
2021/04/27 13:27:30	小学/三年级/三年级五班	3	0	10	0	2	2	2	3	0	0	0
2021/04/27 13:26:23	小学/三年级/三年级五班	3	1	10	0	1	2	2	2	4	0	0
2021/04/27 13:25:01	小学/三年级/三年级五班	3	1	9	0	1	0	1	2	4	1	1
2021/04/27 13:23:44	小学/三年级/三年级五班	3	0	10	0	1	2	2	3	0	0	0
2021/04/27 13:23:17	小学/三年级/三年级五班	3	0	9	0	2	2	1	2	4	1	0
2021/04/27 13:23:44	小学/三年级/三年级五班	3	1	9	0	2	1	1	2	1	1	1
2021/04/27 13:24:37	小学/三年级/三年级五班	3	1	10	0	2	2	2	3	0	0	0
2021/04/27 13:22:26	小学/三年级/三年级五班	3	0	9	0	2	2	1	3	0	0	0
2021/04/27 13:25:10	小学/三年级/三年级五班	3	1	9	0	1	2	2	2	3	0	0
2021/04/27 13:23:30	小学/三年级/三年级五班	3	1	9	0	2	2	2	3	0	0	0
2021/04/27 13:23:27	小学/三年级/三年级五班	3	1	9	0	2	2	2	3	0	0	0
2021/04/27 13:22:08	小学/三年级/三年级五班	3	0	10	0	2	2	2	2	1	0	0
2021/04/27 13:22:08	小学/三年级/三年级五班	3	0	9	0	2	1	2	3	0	0	1
2021/04/27 13:24:59	小学/三年级/三年级五班	3	1	9	0	2	2	2	3	0	0	0
2021/04/27 13:26:09	小学/三年级/三年级五班	3	1	9	0	2	1	1	3	0	1	1
2021/04/27 13:21:50	小学/三年级/三年级五班	3	0	9	0	2	2	1	3	0	0	1
2021/04/27 13:23:46	小学/三年级/三年级五班	3	1	9	0	2	1	1	1	2	0	1
2021/04/27 13:23:41	小学/三年级/三年级五班	3	1	10	1	2	1	1	1	1	1	1
2021/04/27 13:21:00	小学/三年级/三年级五班	3	0	9	0	2	2	1	2	1	1	0
2021/04/27 13:23:19	小学/三年级/三年级五班	3	1	9	0	2	1	1	3	0	0	1
2021/04/27 13:21:46	小学/三年级/三年级五班	3	0	9	0	1	2	1	3	0	0	0
2021/04/27 13:23:33	小学/三年级/三年级五班	3	1	10	1	2	2	2	3	0	0	1
2021/04/27 13:21:48	小学/三年级/三年级五班	3	0	10	0	2	1	0	3	0	0	0
2021/04/27 13:19:40	小学/三年级/三年级五班	3	0	9	0	2	2	2	3	0	0	0
2021/04/27 13:20:23	小学/三年级/三年级五班	3	0	10	0	2	1	1	2	1	0	0
2021/04/27 13:20:31	小学/三年级/三年级五班	3	0	9	0	1	2	1	2	1	0	0
2021/04/27 13:20:08	小学/三年级/三年级五班	3	0	10	0	1	2	2	3	0	0	0
2021/04/27 13:20:56	小学/三年级/三年级五班	3	0	9	0	2	2	1	3	0	0	0
2021/04/27 13:23:04	小学/三年级/三年级五班	3	1	9	0	1	2	1	3	0	0	0
2021/04/27 13:21:29	小学/三年级/三年级五班	3	1	9	0	1	2	2	2	4	0	1
2021/04/27 13:20:19	小学/三年级/三年级五班	3	0	9	0	2	2	1	2	4	1	0
2021/04/27 13:19:55	小学/三年级/三年级五班	3	0	9	0	1	2	1	2	4	0	1
2021/04/27 13:20:37	小学/三年级/三年级五班	3	0	9	0	2	2	1	2	1	0	0
2021/04/27 13:22:05	小学/三年级/三年级五班	3	1	9	0	2	1	1	2	1	0	0
2021/04/27 13:22:15	小学/三年级/三年级五班	3	1	9	0	2	1	2	3	0	0	1
2021/04/27 13:22:14	小学/三年级/三年级五班	3	1	9	0	2	1	1	2	1	0	0
2021/04/27 13:24:20	小学/三年级/三年级五班	3	0	10	0	2	2	1	3	0	0	0
2021/04/27 13:19:13	小学/三年级/三年级五班	3	0	10	0	2	2	2	2	1	0	0
2021/04/27 13:25:39	小学/三年级/三年级五班	3	1	9	0	1	0	1	2	1	0	1
2021/04/26 10:18:49	小学/三年级/三年级二班	3	1	10	0	2	1	2	3	0	0	0
2021/04/26 10:13:09	小学/三年级/三年级二班	3	1	10	0	2	0	2	2	2	0	0
2021/04/26 10:11:49	小学/三年级/三年级二班	3	1	9	0	1	0	1	3	0	0	1
2021/04/26 10:10:21	小学/三年级/三年级二班	3	0	9	0	2	1	2	3	0	0	0
2021/04/26 10:08:17	小学/三年级/三年级二班	3	1	9	0	1	1	2	2	1	0	0
2021/04/26 10:07:35	小学/三年级/三年级二班	3	0	9	0	1	1	1	1	4	0	1
2021/04/26 10:08:19	小学/三年级/三年级二班	3	1	10	0	2	2	1	2	1	0	0
2021/04/26 10:06:56	小学/三年级/三年级二班	3	0	9	0	2	2	2	2	1	1	0
2021/04/26 10:07:53	小学/三年级/三年级二班	3	1	9	0	2	2	2	0	1	0	1
2021/04/26 10:09:33	小学/三年级/三年级二班	3	1	10	0	1	2	2	3	0	1	0
2021/04/26 10:07:22	小学/三年级/三年级二班	3	0	9	0	1	2	2	2	2	0	0
2021/04/26 10:07:44	小学/三年级/三年级二班	3	1	10	0	2	2	2	3	0	0	0
2021/04/26 10:07:29	小学/三年级/三年级二班	3	1	9	1	2	1	1	3	0	0	0
2021/04/26 10:06:55	小学/三年级/三年级二班	3	1	10	0	2	1	1	3	0	0	0
2021/04/26 10:06:03	小学/三年级/三年级二班	3	0	9	0	2	2	2	3	0	0	0
2021/04/26 10:06:56	小学/三年级/三年级二班	3	0	10	0	2	2	2	3	0	0	0
2021/04/26 10:15:55	小学/三年级/三年级二班	3	1	9	0	2	2	2	3	0	0	0
2021/04/26 10:07:20	小学/三年级/三年级二班	3	1	9	0	2	1	1	2	3	0	0
2021/04/26 10:07:33	小学/三年级/三年级二班	3	0	9	0	2	1	2	2	1	0	1
2021/04/26 10:05:49	小学/三年级/三年级二班	3	0	9	0	2	1	2	3	0	0	0
2021/04/26 10:06:05	小学/三年级/三年级二班	3	0	9	0	2	2	1	3	0	0	0
2021/04/26 10:07:55	小学/三年级/三年级二班	3	1	9	0	2	2	2	0	1	0	0
2021/04/26 10:05:13	小学/三年级/三年级二班	3	0	10	0	1	1	2	1	1	0	1
2021/04/26 10:04:55	小学/三年级/三年级二班	3	1	9	0	2	0	0	2	1	1	1
2021/04/26 10:07:54	小学/三年级/三年级二班	3	0	10	0	1	1	2	3	0	1	1
2021/04/26 10:06:57	小学/三年级/三年级二班	3	0	9	0	2	1	1	2	1	0	1
2021/04/26 10:07:08	小学/三年级/三年级二班	3	1	9	0	2	2	2	3	0	0	0
2021/04/26 10:06:32	小学/三年级/三年级二班	3	0	9	0	2	1	1	3	0	0	0
2021/04/26 10:04:48	小学/三年级/三年级二班	3	0	10	0	2	2	2	2	4	0	0
2021/04/26 10:06:10	小学/三年级/三年级二班	3	0	9	0	2	1	2	3	0	0	0
2021/04/26 10:06:10	小学/三年级/三年级二班	3	0	9	0	2	2	1	3	0	0	0
2021/04/26 10:05:34	小学/三年级/三年级二班	3	0	9	0	2	2	2	2	3	0	0
2021/04/26 10:04:30	小学/三年级/三年级二班	3	1	9	0	1	1	1	1	2	1	1
2021/04/26 10:06:09	小学/三年级/三年级二班	3	0	9	0	1	1	1	2	4	0	1
2021/04/26 10:05:14	小学/三年级/三年级二班	3	1	9	0	2	1	2	2	1	0	0
2021/04/26 10:05:15	小学/三年级/三年级二班	3	0	9	0	2	2	2	3	0	0	0
2021/04/26 10:03:57	小学/三年级/三年级二班	3	0	9	0	2	2	1	3	0	0	0
2021/04/26 10:07:49	小学/三年级/三年级二班	3	1	10	0	1	2	2	2	4	1	0
2021/04/26 10:03:56	小学/三年级/三年级二班	3	0	10	0	2	2	2	3	0	0	0
2021/04/23 11:34:57	小学/三年级/三年级一班	3	0	9	0	2	1	1	3	0	0	0
2021/04/23 11:35:42	小学/三年级/三年级一班	3	1	9	0	1	2	2	3	0	0	0
2021/04/23 11:33:46	小学/三年级/三年级一班	3	0	9	0	2	2	2	2	1	0	0
2021/04/23 11:34:05	小学/三年级/三年级一班	3	1	10	0	2	2	2	3	0	0	0
2021/04/23 11:31:52	小学/三年级/三年级一班	3	1	10	0	2	2	0	2	1	0	0
2021/04/23 11:32:10	小学/三年级/三年级一班	3	1	9	0	1	1	2	2	1	0	1
2021/04/23 11:30:06	小学/三年级/三年级一班	3	0	9	0	2	2	2	3	0	0	0
2021/04/23 11:31:59	小学/三年级/三年级一班	3	1	10	0	1	1	1	2	1	1	0
2021/04/23 11:30:04	小学/三年级/三年级一班	3	0	10	0	2	0	1	2	1	0	0
2021/04/23 11:31:45	小学/三年级/三年级一班	3	1	10	0	2	2	2	3	0	0	0
2021/04/23 11:29:34	小学/三年级/三年级一班	3	1	9	0	2	1	1	2	1	0	0
2021/04/23 11:28:33	小学/三年级/三年级一班	3	0	10	0	1	1	2	3	0	1	1
2021/04/23 11:27:24	小学/三年级/三年级一班	3	0	10	0	1	0	1	3	0	0	0
2021/04/23 11:27:38	小学/三年级/三年级一班	3	0	10	0	2	2	2	2	4	1	0
2021/04/23 11:27:26	小学/三年级/三年级一班	3	0	9	0	2	2	1	3	0	0	0
2021/04/23 11:26:10	小学/三年级/三年级一班	3	0	9	0	1	2	2	2	2	1	1
2021/04/23 11:27:58	小学/三年级/三年级一班	3	0	10	0	1	1	1	2	2	0	0
2021/04/23 11:26:22	小学/三年级/三年级一班	3	0	9	0	2	2	1	2	2	0	0
2021/04/23 11:27:57	小学/三年级/三年级一班	3	1	10	0	1	1	1	2	1	0	1
2021/04/23 11:25:56	小学/三年级/三年级一班	3	0	10	0	2	2	2	3	0	0	0
2021/04/23 11:26:13	小学/三年级/三年级一班	3	0	9	0	2	0	2	3	0	0	0
2021/04/23 11:25:04	小学/三年级/三年级一班	3	0	9	0	2	1	1	3	0	0	0
2021/04/23 11:26:42	小学/三年级/三年级一班	3	1	9	0	2	2	2	2	1	0	0
2021/04/23 11:24:52	小学/三年级/三年级一班	3	1	9	0	0	0	2	2	1	1	1
2021/04/23 11:27:24	小学/三年级/三年级一班	3	1	10	0	2	2	2	3	0	0	0
2021/04/23 11:24:58	小学/三年级/三年级一班	3	1	9	0	2	1	2	3	0	0	1
2021/04/23 11:26:48	小学/三年级/三年级一班	3	1	9	0	2	2	2	3	0	0	0
2021/04/23 11:25:15	小学/三年级/三年级一班	3	0	9	0	2	1	1	3	0	0	0
2021/04/23 11:25:29	小学/三年级/三年级一班	3	1	9	0	2	1	2	0	1	0	1
2021/04/23 11:23:39	小学/三年级/三年级一班	3	0	9	0	2	2	1	3	0	0	0
2021/04/23 11:24:04	小学/三年级/三年级一班	3	1	9	0	2	2	2	3	0	0	0
2021/04/23 11:23:04	小学/三年级/三年级一班	3	0	9	0	2	1	2	3	0	0	0
2021/04/23 11:23:42	小学/三年级/三年级一班	3	1	9	0	2	2	2	3	0	0	0
2021/04/23 11:23:03	小学/三年级/三年级一班	3	0	9	0	1	2	1	2	3	0	0
2021/04/23 11:22:55	小学/三年级/三年级一班	3	1	9	0	2	2	2	2	4	0	0
2021/04/23 11:24:13	小学/三年级/三年级一班	3	0	9	0	2	2	1	2	1	0	0
2021/04/23 11:21:26	小学/三年级/三年级一班	3	0	9	0	1	2	1	2	4	0	0
2021/04/23 11:21:47	小学/三年级/三年级一班	3	1	9	0	2	2	1	3	0	0	1
2021/04/23 11:21:31	小学/三年级/三年级一班	3	0	10	0	2	2	1	2	4	0	0
2021/04/23 11:23:51	小学/三年级/三年级一班	3	1	10	0	2	1	1	2	1	0	0
2021/04/23 11:20:48	小学/三年级/三年级一班	3	0	9	0	1	2	1	1	1	0	1
2021/04/26 15:12:23	小学/三年级/三年级九班	3	1	9	0	1	2	2	3	0	1	0
2021/04/26 15:12:43	小学/三年级/三年级九班	3	0	9	1	2	2	2	3	0	0	1
2021/04/26 15:11:05	小学/三年级/三年级九班	3	1	9	0	1	1	2	2	4	0	0
2021/04/26 15:12:45	小学/三年级/三年级九班	3	1	9	0	2	1	2	3	0	0	0
2021/04/26 15:10:56	小学/三年级/三年级九班	3	0	9	0	2	1	2	3	0	0	0
2021/04/26 15:09:36	小学/三年级/三年级八班	3	0	10	0	1	1	1	2	1	0	0
2021/04/26 15:12:24	小学/三年级/三年级九班	3	1	9	0	2	1	1	2	4	0	0
2021/04/26 15:11:42	小学/三年级/三年级九班	3	1	9	0	2	0	2	2	1	0	1
2021/04/26 15:08:42	小学/三年级/三年级九班	3	1	10	0	2	0	1	3	0	0	1
2021/04/26 15:09:00	小学/三年级/三年级八班	3	0	10	0	2	1	1	3	0	0	0
2021/04/26 15:09:12	小学/三年级/三年级九班	3	0	10	0	1	1	2	2	2	0	0
2021/04/26 15:08:32	小学/三年级/三年级九班	3	0	10	0	1	1	2	2	4	0	0
2021/04/26 15:09:00	小学/三年级/三年级九班	3	0	10	0	2	2	2	2	2	0	0
2021/04/26 15:08:29	小学/三年级/三年级九班	3	1	9	0	2	2	2	3	0	0	0
2021/04/26 15:09:47	小学/三年级/三年级九班	3	0	10	1	2	1	2	3	0	0	0
2021/04/26 15:08:16	小学/三年级/三年级九班	3	1	10	0	2	1	0	2	1	0	1
2021/04/26 15:06:43	小学/三年级/三年级八班	3	1	9	0	2	2	2	3	0	0	0
2021/04/26 15:07:57	小学/三年级/三年级九班	3	1	9	0	2	2	1	2	4	0	0
2021/04/26 15:08:11	小学/三年级/三年级九班	3	1	9	0	2	1	1	3	0	0	0
2021/04/26 15:07:32	小学/三年级/三年级九班	3	1	10	0	1	1	1	3	0	1	1
2021/04/26 15:08:44	小学/三年级/三年级九班	3	0	10	0	2	2	2	3	0	0	0
2021/04/26 15:06:55	小学/三年级/三年级九班	3	0	9	0	2	2	1	2	1	1	1
2021/04/26 15:11:19	小学/三年级/三年级九班	3	1	10	0	2	2	2	3	0	0	0
2021/04/26 15:09:54	小学/三年级/三年级九班	3	0	9	0	1	1	2	2	1	0	0
2021/04/26 15:07:02	小学/三年级/三年级八班	3	0	9	0	2	0	1	2	4	1	1
2021/04/26 15:06:37	小学/三年级/三年级九班	3	0	9	0	1	2	2	2	1	0	0
2021/04/26 15:06:21	小学/三年级/三年级八班	3	0	10	0	1	1	1	2	4	0	0
2021/04/26 15:06:37	小学/三年级/三年级九班	3	1	9	0	2	1	1	2	4	1	0
2021/04/26 15:08:31	小学/三年级/三年级九班	3	0	10	0	2	1	2	2	1	1	0
2021/04/26 15:07:01	小学/三年级/三年级九班	3	0	9	0	1	1	2	2	1	0	0
2021/04/26 15:06:00	小学/三年级/三年级九班	3	0	9	0	2	1	1	3	0	0	0
2021/04/26 15:08:34	小学/三年级/三年级九班	3	1	9	0	2	1	1	2	2	0	0
2021/04/26 15:06:41	小学/三年级/三年级九班	3	0	10	0	2	2	0	2	1	0	0
2021/04/26 15:05:12	小学/三年级/三年级八班	3	1	9	0	2	1	2	3	0	0	0
2021/04/26 15:06:09	小学/三年级/三年级九班	3	0	9	0	2	2	1	3	0	0	0
2021/04/26 15:08:29	小学/三年级/三年级八班	3	1	9	0	2	1	0	2	4	0	0
2021/04/26 15:04:35	小学/三年级/三年级八班	3	0	10	0	2	1	1	3	0	0	0
2021/04/26 15:04:57	小学/三年级/三年级九班	3	0	9	0	1	2	1	2	2	0	0
2021/04/26 15:04:26	小学/三年级/三年级八班	3	0	9	0	2	1	1	2	3	1	1
2021/04/26 15:04:05	小学/三年级/三年级八班	3	0	9	0	1	1	1	3	0	0	0
2021/04/26 15:05:57	小学/三年级/三年级九班	3	0	9	0	1	1	1	2	4	1	0
2021/04/26 15:08:52	小学/三年级/三年级九班	3	1	10	0	2	1	1	2	4	1	0
2021/04/26 15:05:10	小学/三年级/三年级九班	3	0	9	0	1	1	1	3	0	0	1
2021/04/26 15:07:36	小学/三年级/三年级九班	3	1	10	0	2	1	1	3	0	0	0
2021/04/26 15:04:25	小学/三年级/三年级九班	3	0	10	0	2	1	1	3	0	0	0
2021/04/26 15:04:45	小学/三年级/三年级九班	3	1	9	0	2	2	1	2	4	0	0
2021/04/26 15:04:16	小学/三年级/三年级八班	3	0	9	0	2	0	1	3	0	0	0
2021/04/26 15:04:38	小学/三年级/三年级八班	3	1	10	0	2	1	1	1	2	1	0
2021/04/26 15:04:02	小学/三年级/三年级九班	3	0	9	0	1	1	1	2	2	0	0
2021/04/26 15:04:12	小学/三年级/三年级九班	3	1	9	0	2	2	1	3	0	0	0
2021/04/26 15:03:47	小学/三年级/三年级九班	3	1	10	0	2	2	1	3	0	0	0
2021/04/26 15:04:14	小学/三年级/三年级九班	3	1	9	0	1	1	2	2	1	0	1
2021/04/26 15:05:48	小学/三年级/三年级八班	3	1	9	0	1	0	1	2	1	0	1
2021/04/26 15:03:18	小学/三年级/三年级九班	3	1	9	0	2	1	2	3	0	0	0
2021/04/26 15:04:41	小学/三年级/三年级九班	3	0	9	0	2	2	2	2	1	0	0
2021/04/26 15:03:44	小学/三年级/三年级九班	3	0	9	0	1	2	2	2	2	0	0
2021/04/26 15:03:38	小学/三年级/三年级八班	3	0	9	0	2	0	1	1	2	0	1
2021/04/26 15:07:47	小学/三年级/三年级九班	3	1	10	0	2	1	1	2	4	0	0
2021/04/26 15:04:12	小学/三年级/三年级八班	3	1	10	0	2	1	2	2	2	0	1
2021/04/26 15:03:52	小学/三年级/三年级九班	3	0	10	0	1	2	1	3	0	0	0
2021/04/26 15:04:56	小学/三年级/三年级九班	3	0	9	0	2	2	2	2	1	0	0
2021/04/26 15:03:42	小学/三年级/三年级九班	3	1	9	0	2	2	2	2	1	0	0
2021/04/26 15:04:05	小学/三年级/三年级九班	3	0	10	0	2	1	1	1	1	1	0
2021/04/26 15:04:38	小学/三年级/三年级九班	3	0	9	0	2	1	2	2	1	0	0
2021/04/26 15:03:00	小学/三年级/三年级九班	3	0	9	0	1	1	0	2	4	0	0
2021/04/26 15:04:17	小学/三年级/三年级八班	3	1	10	0	1	0	1	2	2	0	1
2021/04/26 15:03:57	小学/三年级/三年级九班	3	0	9	0	2	1	1	3	0	0	0
2021/04/26 15:04:16	小学/三年级/三年级八班	3	0	9	0	1	1	1	2	1	0	0
2021/04/26 15:01:46	小学/三年级/三年级八班	3	0	9	0	2	2	2	3	0	0	0
2021/04/26 15:02:46	小学/三年级/三年级八班	3	0	9	0	1	1	2	2	1	0	0
2021/04/26 15:04:03	小学/三年级/三年级八班	3	1	9	0	2	1	1	2	1	0	0
2021/04/26 15:01:25	小学/三年级/三年级八班	3	0	9	0	2	2	2	3	0	0	0
2021/04/26 15:04:52	小学/三年级/三年级八班	3	1	9	0	2	0	1	3	0	0	1
2021/04/26 15:02:24	小学/三年级/三年级八班	3	1	10	0	1	1	1	3	0	1	1
2021/04/26 15:02:33	小学/三年级/三年级八班	3	1	10	0	1	1	0	0	1	0	0
2021/04/26 15:00:48	小学/三年级/三年级八班	3	0	10	0	1	1	2	0	3	0	0
2021/04/26 15:00:42	小学/三年级/三年级八班	3	0	10	0	2	1	0	2	1	1	1
2021/04/26 15:02:23	小学/三年级/三年级八班	3	1	10	0	0	0	1	0	3	1	1
2021/04/26 15:03:15	小学/三年级/三年级八班	3	1	10	0	1	0	1	1	2	1	1
2021/04/26 14:59:37	小学/三年级/三年级八班	3	0	10	0	1	1	1	3	0	0	0
2021/04/26 15:00:20	小学/三年级/三年级八班	3	0	9	0	2	1	2	2	4	0	0
2021/04/26 15:02:03	小学/三年级/三年级八班	3	1	9	0	2	1	1	1	1	0	0
2021/04/26 15:00:53	小学/三年级/三年级八班	3	0	9	0	1	1	2	2	4	0	0
2021/04/26 15:00:32	小学/三年级/三年级八班	3	1	9	0	2	2	1	1	1	0	0
2021/04/26 15:00:49	小学/三年级/三年级八班	3	1	9	0	2	1	2	2	3	0	0
2021/04/26 15:00:59	小学/三年级/三年级八班	3	1	9	0	2	2	2	3	0	1	0
2021/04/26 15:00:05	小学/三年级/三年级八班	3	0	9	0	1	1	1	2	2	0	0
2021/04/26 15:00:22	小学/三年级/三年级八班	3	1	10	0	2	1	2	2	3	0	1
2021/04/26 14:59:29	小学/三年级/三年级八班	3	0	9	0	1	2	1	3	0	0	0
2021/04/26 15:01:57	小学/三年级/三年级八班	3	1	9	0	1	0	0	3	0	0	1
2021/04/26 15:01:14	小学/三年级/三年级八班	3	1	10	1	0	0	1	2	1	1	1
2021/04/26 14:59:50	小学/三年级/三年级八班	3	0	9	0	2	2	2	2	1	0	0
2021/04/26 14:59:18	小学/三年级/三年级八班	3	0	10	0	2	1	1	3	0	0	0
2021/04/26 15:00:09	小学/三年级/三年级八班	3	0	10	0	2	1	0	2	4	0	0
2021/04/26 14:58:17	小学/三年级/三年级八班	3	1	10	0	2	1	2	3	0	0	0
2021/04/26 15:00:26	小学/三年级/三年级八班	3	1	10	0	2	2	1	2	4	0	0
2021/04/26 15:02:43	小学/三年级/三年级八班	3	1	10	0	1	1	2	2	1	0	0
2021/04/26 14:57:50	小学/三年级/三年级八班	3	0	10	0	2	1	1	3	0	0	0
2021/04/26 14:37:30	小学/三年级/三年级六班	3	1	9	0	1	0	1	2	4	0	0
2021/04/26 14:35:16	小学/三年级/三年级六班	3	1	9	0	2	1	1	3	0	0	0
2021/04/26 14:34:20	小学/三年级/三年级六班	3	0	10	0	2	2	2	3	0	0	0
2021/04/26 14:33:29	小学/三年级/三年级七班	3	0	9	0	0	0	1	3	0	0	1
2021/04/26 14:35:29	小学/三年级/三年级七班	3	1	9	0	2	2	1	2	4	0	0
2021/04/26 14:34:26	小学/三年级/三年级七班	3	1	9	0	2	2	2	2	1	0	0
2021/04/26 14:33:41	小学/三年级/三年级七班	3	0	9	0	2	2	1	3	0	1	1
2021/04/26 14:32:32	小学/三年级/三年级七班	3	1	9	0	2	1	2	3	0	0	0
2021/04/26 14:33:16	小学/三年级/三年级七班	3	0	10	0	0	2	2	3	0	1	1
2021/04/26 14:32:39	小学/三年级/三年级七班	3	1	9	0	2	2	1	2	4	0	0
2021/04/26 14:33:00	小学/三年级/三年级七班	3	0	10	0	2	2	2	3	0	0	0
2021/04/26 14:32:43	小学/三年级/三年级七班	3	1	9	0	2	2	1	3	0	0	0
2021/04/26 14:33:39	小学/三年级/三年级七班	3	1	9	0	2	2	2	3	0	0	0
2021/04/26 14:32:06	小学/三年级/三年级七班	3	1	10	0	2	2	2	2	2	0	0
2021/04/26 14:32:11	小学/三年级/三年级六班	3	0	10	1	2	1	2	0	1	0	0
2021/04/26 14:31:50	小学/三年级/三年级六班	3	1	9	0	2	2	2	3	0	0	0
2021/04/26 14:31:39	小学/三年级/三年级七班	3	0	9	0	2	2	1	3	0	0	0
2021/04/26 14:32:28	小学/三年级/三年级七班	3	1	9	0	2	2	1	3	0	0	0
2021/04/26 14:33:16	小学/三年级/三年级七班	3	1	9	0	1	1	2	2	2	0	0
2021/04/26 14:31:40	小学/三年级/三年级六班	3	0	9	0	1	2	2	0	3	0	1
2021/04/26 14:32:30	小学/三年级/三年级六班	3	0	10	0	2	2	1	1	2	0	0
2021/04/26 14:31:55	小学/三年级/三年级七班	3	1	10	0	2	2	2	3	0	0	0
2021/04/26 14:32:37	小学/三年级/三年级七班	3	0	9	0	2	2	1	3	0	0	0
2021/04/26 14:31:19	小学/三年级/三年级七班	3	0	9	0	1	0	2	1	4	1	1
2021/04/26 14:34:33	小学/三年级/三年级七班	3	1	9	0	2	0	2	0	2	1	0
2021/04/26 14:30:29	小学/三年级/三年级七班	3	1	10	0	2	1	2	3	0	0	0
2021/04/26 14:29:34	小学/三年级/三年级六班	3	0	9	1	1	0	0	0	1	0	0
2021/04/26 14:30:47	小学/三年级/三年级七班	3	1	9	0	1	1	1	0	3	1	1
2021/04/26 14:29:36	小学/三年级/三年级六班	3	0	10	0	1	2	2	3	0	0	0
2021/04/26 14:30:20	小学/三年级/三年级七班	3	0	9	0	2	2	2	2	3	0	1
2021/04/26 14:30:41	小学/三年级/三年级六班	3	1	9	0	1	1	1	3	0	0	0
2021/04/26 14:29:57	小学/三年级/三年级七班	3	0	9	0	2	2	1	3	0	0	0
2021/04/26 14:30:22	小学/三年级/三年级七班	3	1	9	0	2	2	2	3	0	0	0
2021/04/26 14:30:43	小学/三年级/三年级七班	3	0	10	0	2	2	2	3	0	0	0
2021/04/26 14:29:48	小学/三年级/三年级七班	3	0	9	0	2	1	2	2	4	0	0
2021/04/26 14:30:57	小学/三年级/三年级六班	3	1	10	0	2	2	1	3	0	0	0
2021/04/26 14:31:45	小学/三年级/三年级六班	3	1	9	0	2	1	1	3	0	0	0
2021/04/26 14:29:59	小学/三年级/三年级七班	3	1	10	0	1	2	1	3	0	0	0
2021/04/26 14:29:18	小学/三年级/三年级六班	3	1	9	0	2	2	1	3	0	0	0
2021/04/26 14:30:04	小学/三年级/三年级七班	3	1	10	0	2	1	2	3	0	0	0
2021/04/26 14:31:45	小学/三年级/三年级六班	3	1	9	0	2	1	2	3	0	0	0
2021/04/26 14:30:16	小学/三年级/三年级七班	3	0	10	0	2	1	2	2	4	0	0
2021/04/26 14:31:59	小学/三年级/三年级六班	3	1	9	0	2	2	1	3	0	0	0
2021/04/26 14:32:40	小学/三年级/三年级七班	3	1	9	0	2	2	1	2	4	0	0
2021/04/26 14:29:01	小学/三年级/三年级七班	3	0	9	0	2	2	1	3	0	0	0
2021/04/26 14:28:34	小学/三年级/三年级六班	3	0	10	0	2	1	1	2	1	1	0
2021/04/26 14:28:36	小学/三年级/三年级七班	3	0	9	0	2	2	2	3	0	1	1
2021/04/26 14:36:52	小学/三年级/三年级七班	3	1	9	0	2	2	2	2	2	1	0
2021/04/26 14:30:14	小学/三年级/三年级七班	3	1	10	0	1	2	1	2	1	0	0
2021/04/26 14:28:41	小学/三年级/三年级七班	3	0	9	0	1	1	1	2	3	0	0
2021/04/26 14:31:10	小学/三年级/三年级六班	3	1	9	0	2	1	1	1	1	1	1
2021/04/26 14:29:02	小学/三年级/三年级七班	3	1	10	0	2	1	2	0	1	0	0
2021/04/26 14:30:42	小学/三年级/三年级六班	3	1	9	0	2	2	1	3	0	0	0
2021/04/26 14:29:12	小学/三年级/三年级七班	3	0	10	0	1	1	2	2	1	0	0
2021/04/26 14:28:27	小学/三年级/三年级六班	3	0	10	0	2	1	1	2	1	1	0
2021/04/26 14:29:27	小学/三年级/三年级七班	3	0	9	0	2	2	2	2	2	0	0
2021/04/26 14:28:41	小学/三年级/三年级七班	3	0	10	0	1	0	2	3	0	0	0
2021/04/26 14:28:02	小学/三年级/三年级六班	3	0	9	0	2	2	2	3	0	0	0
2021/04/26 14:28:52	小学/三年级/三年级七班	3	0	9	0	2	1	1	3	0	0	0
2021/04/26 14:29:04	小学/三年级/三年级七班	3	1	9	0	2	2	1	2	4	1	0
2021/04/26 14:28:03	小学/三年级/三年级六班	3	0	9	0	2	2	2	2	1	0	0
2021/04/26 14:29:02	小学/三年级/三年级七班	3	0	9	0	2	0	1	3	0	0	1
2021/04/26 14:29:03	小学/三年级/三年级六班	3	1	9	0	2	1	2	2	4	1	1
2021/04/26 14:30:00	小学/三年级/三年级七班	3	0	10	0	1	1	2	3	0	0	0
2021/04/26 14:28:59	小学/三年级/三年级七班	3	1	10	0	2	1	2	2	1	0	0
2021/04/26 14:28:19	小学/三年级/三年级七班	3	1	9	0	2	1	1	3	0	1	0
2021/04/26 14:27:53	小学/三年级/三年级七班	3	0	10	0	1	1	2	2	2	0	0
2021/04/26 14:28:58	小学/三年级/三年级七班	3	1	9	0	2	2	1	2	1	0	0
2021/04/26 14:30:29	小学/三年级/三年级七班	3	0	10	0	2	2	2	3	0	0	0
2021/04/26 14:30:56	小学/三年级/三年级六班	3	1	9	0	2	1	2	2	2	0	0
2021/04/26 14:27:07	小学/三年级/三年级六班	3	0	9	0	2	2	2	3	0	0	0
2021/04/26 14:27:37	小学/三年级/三年级六班	3	0	9	0	2	2	1	3	0	0	0
2021/04/26 14:27:55	小学/三年级/三年级六班	3	0	9	0	2	1	0	3	0	0	0
2021/04/26 14:27:40	小学/三年级/三年级六班	3	0	9	0	1	1	1	3	0	0	0
2021/04/26 14:27:24	小学/三年级/三年级七班	3	1	9	0	2	2	2	3	0	0	0
2021/04/26 14:27:10	小学/三年级/三年级七班	3	0	9	0	2	2	1	3	0	0	0
2021/04/26 14:28:05	小学/三年级/三年级六班	3	0	9	0	2	2	1	3	0	0	0
2021/04/26 14:27:09	小学/三年级/三年级七班	3	0	10	0	2	0	2	2	1	0	0
2021/04/26 14:27:38	小学/三年级/三年级七班	3	0	10	0	2	1	1	2	2	0	0
2021/04/26 14:26:52	小学/三年级/三年级六班	3	0	9	0	2	1	2	2	4	0	0
2021/04/26 14:26:38	小学/三年级/三年级六班	3	0	10	0	2	1	2	3	0	0	0
2021/04/26 14:27:08	小学/三年级/三年级六班	3	1	9	0	2	2	1	3	0	0	0
2021/04/26 14:29:29	小学/三年级/三年级六班	3	1	9	0	2	2	1	2	2	0	0
2021/04/26 14:26:13	小学/三年级/三年级六班	3	0	9	0	2	1	1	2	4	0	0
2021/04/26 14:29:44	小学/三年级/三年级六班	3	1	10	0	2	1	2	2	2	0	0
2021/04/26 14:26:30	小学/三年级/三年级六班	3	0	9	0	2	0	2	2	3	1	1
2021/04/26 14:29:26	小学/三年级/三年级六班	3	1	9	0	2	2	2	2	1	0	0
2021/04/26 14:25:51	小学/三年级/三年级六班	3	0	9	1	2	0	2	2	1	0	1
2021/04/26 14:28:27	小学/三年级/三年级六班	3	1	9	0	2	2	1	3	0	0	0
2021/04/26 14:25:49	小学/三年级/三年级六班	3	0	10	0	2	2	1	3	0	0	0
2021/04/26 14:25:36	小学/三年级/三年级六班	3	0	9	1	2	1	2	2	1	1	1
2021/04/26 14:27:24	小学/三年级/三年级六班	3	0	9	0	1	1	1	3	0	0	0
2021/04/26 14:27:16	小学/三年级/三年级六班	3	0	9	0	2	1	1	0	3	0	0
2021/04/26 14:26:48	小学/三年级/三年级六班	3	1	10	0	2	0	2	1	1	1	1
2021/04/26 14:29:22	小学/三年级/三年级六班	3	1	9	0	2	2	1	3	0	0	0
2021/04/26 14:27:22	小学/三年级/三年级六班	3	1	9	0	2	1	1	2	4	0	0
2021/04/26 14:28:22	小学/三年级/三年级六班	3	1	9	0	2	2	1	2	4	0	0
2021/04/26 14:26:56	小学/三年级/三年级六班	3	1	9	0	2	1	2	3	0	0	0
2021/04/26 14:25:32	小学/三年级/三年级六班	3	1	9	0	1	2	2	2	1	1	0
2021/04/26 14:35:03	小学/三年级/三年级六班	3	1	9	0	2	0	1	2	4	1	1
2021/04/26 14:13:58	小学/三年级/三年级四班	3	1	10	0	2	1	1	3	0	0	0
2021/04/26 14:14:14	小学/三年级/三年级四班	3	1	9	0	2	1	1	2	1	0	0
2021/04/26 14:12:37	小学/三年级/三年级四班	3	0	10	0	2	2	2	3	0	0	0
2021/04/26 14:10:57	小学/三年级/三年级五班	3	1	9	0	1	0	2	1	3	1	1
2021/04/26 14:11:07	小学/三年级/三年级五班	3	0	9	0	1	2	2	3	0	0	0
2021/04/26 14:13:10	小学/三年级/三年级四班	3	1	9	0	1	1	2	3	0	0	0
2021/04/26 14:13:01	小学/三年级/三年级四班	3	1	9	0	1	1	2	2	3	0	0
2021/04/26 14:09:53	小学/三年级/三年级四班	3	0	9	0	1	1	0	1	4	0	0
2021/04/26 14:10:39	小学/三年级/三年级四班	3	1	9	0	2	2	2	3	0	0	0
2021/04/26 14:10:07	小学/三年级/三年级四班	3	1	10	0	1	2	1	3	0	0	0
2021/04/26 14:07:55	小学/三年级/三年级四班	3	0	10	0	2	2	2	2	4	0	0
2021/04/26 14:07:46	小学/三年级/三年级四班	3	0	10	0	1	0	1	2	1	1	1
2021/04/26 14:09:30	小学/三年级/三年级四班	3	1	10	0	1	2	1	2	1	0	0
2021/04/26 14:09:28	小学/三年级/三年级四班	3	1	10	0	2	2	1	1	3	0	0
2021/04/26 14:07:47	小学/三年级/三年级四班	3	0	9	0	2	1	2	2	1	0	1
2021/04/26 14:07:24	小学/三年级/三年级四班	3	0	9	0	1	1	1	2	1	1	0
2021/04/26 14:08:04	小学/三年级/三年级四班	3	1	9	0	2	2	2	2	4	0	0
2021/04/26 14:08:01	小学/三年级/三年级四班	3	0	9	0	1	2	2	2	2	0	0
2021/04/26 14:06:43	小学/三年级/三年级四班	3	0	10	0	2	0	2	2	1	0	1
2021/04/26 14:08:20	小学/三年级/三年级四班	3	1	9	0	1	1	0	2	3	0	0
2021/04/26 14:09:07	小学/三年级/三年级四班	3	1	9	0	1	0	1	0	3	0	1
2021/04/26 14:08:36	小学/三年级/三年级四班	3	1	9	0	2	2	2	3	0	0	0
2021/04/26 14:08:47	小学/三年级/三年级四班	3	1	9	0	2	1	2	2	2	0	0
2021/04/26 14:06:57	小学/三年级/三年级四班	3	0	10	0	1	2	1	2	3	0	0
2021/04/26 14:06:28	小学/三年级/三年级五班	3	0	9	0	1	1	1	2	1	0	0
2021/04/26 14:06:15	小学/三年级/三年级五班	3	0	9	0	1	1	0	3	0	0	0
2021/04/26 14:10:19	小学/三年级/三年级四班	3	1	10	0	2	2	2	3	0	0	0
2021/04/26 14:09:06	小学/三年级/三年级四班	3	1	10	0	2	1	1	2	1	0	0
2021/04/26 14:07:26	小学/三年级/三年级四班	3	0	9	1	1	1	1	2	2	1	0
2021/04/26 14:05:51	小学/三年级/三年级四班	3	0	10	0	2	1	1	2	1	0	0
2021/04/26 14:10:14	小学/三年级/三年级四班	3	1	10	0	2	2	2	3	0	0	0
2021/04/26 14:10:04	小学/三年级/三年级四班	3	1	10	0	2	1	1	3	0	0	0
2021/04/26 14:06:43	小学/三年级/三年级四班	3	0	9	0	2	1	2	3	0	0	0
2021/04/26 14:06:06	小学/三年级/三年级四班	3	0	10	0	2	2	1	2	1	0	0
2021/04/26 14:07:55	小学/三年级/三年级四班	3	0	9	0	1	2	2	2	1	0	1
2021/04/26 14:07:05	小学/三年级/三年级四班	3	1	9	0	2	2	2	2	2	0	0
2021/04/26 14:06:22	小学/三年级/三年级四班	3	0	9	0	2	1	2	3	0	0	0
2021/04/26 14:05:53	小学/三年级/三年级四班	3	0	9	0	2	2	1	2	4	1	0
2021/04/26 14:06:10	小学/三年级/三年级四班	3	0	10	0	2	1	2	3	0	0	0
2021/04/26 14:08:48	小学/三年级/三年级四班	3	1	9	0	1	1	2	2	1	0	0
2021/04/26 14:07:36	小学/三年级/三年级四班	3	1	9	0	2	0	2	2	1	0	0
2021/04/26 14:07:08	小学/三年级/三年级四班	3	1	10	0	2	1	2	2	2	0	0
2021/04/26 14:06:21	小学/三年级/三年级四班	3	0	10	0	2	2	1	2	2	0	0
2021/04/26 14:08:41	小学/三年级/三年级四班	3	1	9	0	2	2	1	1	1	0	0
2021/04/26 14:05:23	小学/三年级/三年级四班	3	0	9	0	0	1	0	2	4	1	1
2021/04/26 14:05:43	小学/三年级/三年级四班	3	0	10	0	2	2	1	0	1	1	0
2021/04/26 14:05:23	小学/三年级/三年级四班	3	0	10	0	2	1	1	2	4	0	0
2021/04/26 14:07:30	小学/三年级/三年级五班	3	0	9	0	2	2	2	2	4	0	0
2021/04/26 14:05:17	小学/三年级/三年级五班	3	0	9	0	1	1	1	0	2	1	1
2021/04/26 14:05:35	小学/三年级/三年级四班	3	0	10	0	2	2	2	3	0	0	0
2021/04/26 14:05:56	小学/三年级/三年级四班	3	1	10	0	2	1	2	3	0	0	0
2021/04/26 14:04:55	小学/三年级/三年级四班	3	0	10	0	2	2	1	3	0	0	0
2021/04/26 14:05:04	小学/三年级/三年级四班	3	0	10	0	2	1	2	3	0	0	0
2021/04/26 14:06:17	小学/三年级/三年级五班	3	1	10	0	1	1	1	2	4	0	0
2021/04/26 14:05:15	小学/三年级/三年级五班	3	0	10	0	1	1	2	2	2	0	1
2021/04/26 14:04:15	小学/三年级/三年级四班	3	0	9	0	2	1	1	3	0	0	0
2021/04/26 14:04:39	小学/三年级/三年级五班	3	0	10	0	2	1	1	3	0	0	1
2021/04/26 14:04:51	小学/三年级/三年级五班	3	0	9	0	2	2	2	3	0	1	0
2021/04/26 14:05:05	小学/三年级/三年级五班	3	1	9	0	2	2	2	2	2	0	0
2021/04/26 14:03:53	小学/三年级/三年级五班	3	0	9	0	2	1	1	3	0	0	0
2021/04/26 14:03:47	小学/三年级/三年级五班	3	1	9	0	1	2	1	3	0	0	0
2021/04/26 14:05:03	小学/三年级/三年级五班	3	1	10	0	2	1	1	2	4	1	0
2021/04/26 14:04:14	小学/三年级/三年级五班	3	1	9	0	2	2	2	2	1	0	0
2021/04/26 14:04:31	小学/三年级/三年级五班	3	1	10	0	2	2	1	2	1	0	0
2021/04/26 14:04:06	小学/三年级/三年级五班	3	1	10	0	2	2	0	3	0	0	0
2021/04/26 14:03:18	小学/三年级/三年级五班	3	1	9	0	2	1	2	2	1	0	0
2021/04/26 14:01:48	小学/三年级/三年级五班	3	0	9	0	2	2	1	2	1	0	0
2021/04/26 14:00:51	小学/三年级/三年级五班	3	0	9	0	2	1	2	0	1	0	1
2021/04/26 14:04:27	小学/三年级/三年级五班	3	0	9	0	2	2	1	3	0	0	0
2021/04/26 14:06:08	小学/三年级/三年级五班	3	1	9	0	1	2	0	1	1	0	0
2021/04/26 14:04:11	小学/三年级/三年级五班	3	1	10	0	1	1	1	3	0	0	1
2021/04/26 14:02:13	小学/三年级/三年级五班	3	1	9	0	1	1	1	2	1	0	0
2021/04/26 14:02:03	小学/三年级/三年级五班	3	0	9	0	2	2	2	3	0	0	0
2021/04/26 14:02:00	小学/三年级/三年级五班	3	1	9	0	2	2	2	2	1	0	0
2021/04/26 14:01:17	小学/三年级/三年级五班	3	1	9	0	2	1	1	2	4	0	0
2021/04/26 14:01:39	小学/三年级/三年级五班	3	0	10	0	2	1	1	2	4	0	0
2021/04/26 14:00:09	小学/三年级/三年级五班	3	1	9	0	2	1	1	2	4	0	0
2021/04/26 13:59:24	小学/三年级/三年级五班	3	0	10	0	0	1	2	0	1	0	1
2021/04/26 13:58:15	小学/三年级/三年级五班	3	0	10	0	2	2	2	3	0	0	0
2021/04/26 14:00:26	小学/三年级/三年级五班	3	1	10	0	2	2	2	3	0	0	0
2021/04/26 13:58:36	小学/三年级/三年级五班	3	0	9	0	2	1	2	2	4	0	0
2021/04/26 14:00:11	小学/三年级/三年级五班	3	1	9	0	1	2	2	3	0	0	0
2021/04/26 14:00:33	小学/三年级/三年级五班	3	1	9	0	2	2	2	2	2	0	0
2021/04/26 13:57:57	小学/三年级/三年级五班	3	0	9	0	2	1	1	2	4	0	0
2021/04/26 14:02:21	小学/三年级/三年级五班	3	1	9	0	2	1	0	2	4	0	0
2021/04/26 14:00:07	小学/三年级/三年级五班	3	1	10	0	2	2	1	2	2	0	0
2021/04/26 13:57:19	小学/三年级/三年级五班	3	0	10	0	2	2	1	3	0	0	0
2021/04/26 14:02:29	小学/三年级/三年级五班	3	1	10	0	2	1	0	3	0	0	0
2021/04/26 13:59:58	小学/三年级/三年级五班	3	1	9	0	2	1	1	3	0	0	0
2021/04/26 13:58:48	小学/三年级/三年级五班	3	0	9	0	2	1	1	2	2	0	0
2021/04/26 13:59:16	小学/三年级/三年级五班	3	1	9	0	2	2	2	2	1	0	0
2021/04/26 13:59:50	小学/三年级/三年级五班	3	1	9	0	2	1	1	3	0	0	0
2021/04/26 13:58:06	小学/三年级/三年级五班	3	0	10	0	1	1	0	3	0	0	0
2021/04/26 13:57:23	小学/三年级/三年级五班	3	0	9	0	1	2	1	2	1	1	0
2021/04/26 13:57:22	小学/三年级/三年级五班	3	0	9	0	2	2	1	0	1	0	1
2021/04/26 13:58:05	小学/三年级/三年级五班	3	0	9	0	2	2	2	2	4	0	0
2021/04/26 13:57:04	小学/三年级/三年级五班	3	0	9	0	1	0	2	2	1	0	1
2021/04/26 13:59:04	小学/三年级/三年级五班	3	0	9	0	1	0	1	1	1	1	1
2021/04/26 12:25:01	小学/三年级/三年级二班	3	1	9	0	1	2	2	2	2	0	0
2021/04/26 12:25:36	小学/三年级/三年级二班	3	1	9	0	2	2	1	2	1	0	0
2021/04/26 12:21:19	小学/三年级/三年级二班	3	1	9	0	2	1	2	3	0	0	0
2021/04/26 12:20:46	小学/三年级/三年级二班	3	0	10	0	2	1	1	2	1	0	0
2021/04/26 12:22:00	小学/三年级/三年级二班	3	0	10	0	1	1	2	2	4	0	0
2021/04/26 12:20:17	小学/三年级/三年级二班	3	0	9	0	1	1	2	2	3	1	0
2021/04/26 12:20:05	小学/三年级/三年级二班	3	0	10	0	2	2	2	3	0	0	0
2021/04/26 12:21:29	小学/三年级/三年级二班	3	1	9	0	2	2	1	2	1	0	0
2021/04/26 12:19:56	小学/三年级/三年级二班	3	1	9	0	1	0	1	1	1	0	1
2021/04/26 12:20:42	小学/三年级/三年级二班	3	1	9	0	2	2	2	3	0	0	0
2021/04/26 12:20:46	小学/三年级/三年级二班	3	1	9	0	2	1	1	2	1	1	0
2021/04/26 12:20:23	小学/三年级/三年级二班	3	0	9	0	2	2	2	2	3	0	0
2021/04/26 12:21:55	小学/三年级/三年级二班	3	0	10	0	2	2	2	3	0	0	0
2021/04/26 12:20:32	小学/三年级/三年级二班	3	1	9	0	2	2	1	2	1	0	0
2021/04/26 12:20:46	小学/三年级/三年级二班	3	1	10	0	2	1	2	3	0	0	0
2021/04/26 12:19:15	小学/三年级/三年级二班	3	0	9	0	2	1	1	2	2	1	0
2021/04/26 12:19:34	小学/三年级/三年级二班	3	1	9	0	1	2	1	2	1	0	0
2021/04/26 12:20:06	小学/三年级/三年级二班	3	1	9	0	2	1	2	3	0	0	0
2021/04/26 12:18:40	小学/三年级/三年级二班	3	0	9	0	2	1	1	0	1	1	0
2021/04/26 12:19:32	小学/三年级/三年级二班	3	0	9	0	2	1	1	2	1	0	0
2021/04/26 12:21:00	小学/三年级/三年级二班	3	1	9	0	1	1	1	2	1	0	1
2021/04/26 12:20:20	小学/三年级/三年级二班	3	1	10	0	2	1	2	3	0	0	0
2021/04/26 12:20:00	小学/三年级/三年级二班	3	0	9	0	1	2	1	2	2	1	0
2021/04/26 12:19:01	小学/三年级/三年级二班	3	1	9	0	2	1	1	2	3	0	0
2021/04/26 12:18:00	小学/三年级/三年级二班	3	0	9	0	2	2	1	3	0	1	0
2021/04/26 12:22:07	小学/三年级/三年级二班	3	0	9	0	2	2	1	3	0	0	0
2021/04/26 12:20:45	小学/三年级/三年级二班	3	1	9	0	2	2	2	2	1	0	0
2021/04/26 12:18:08	小学/三年级/三年级二班	3	0	10	0	2	2	0	3	0	1	0
2021/04/26 12:20:05	小学/三年级/三年级二班	3	1	10	0	0	1	1	3	0	0	0
2021/04/26 12:18:16	小学/三年级/三年级二班	3	0	9	0	2	1	1	1	1	0	0
2021/04/26 12:19:28	小学/三年级/三年级二班	3	0	9	0	2	2	2	0	4	1	1
2021/04/26 12:19:18	小学/三年级/三年级二班	3	0	9	0	2	0	1	3	0	0	1
2021/04/26 12:18:42	小学/三年级/三年级二班	3	1	9	0	1	1	1	3	0	0	0
2021/04/26 12:17:52	小学/三年级/三年级二班	3	1	9	0	2	2	1	3	0	0	0
2021/04/26 12:18:17	小学/三年级/三年级二班	3	1	9	0	2	1	2	3	0	0	0
2021/04/26 12:17:09	小学/三年级/三年级二班	3	0	9	0	2	1	1	1	3	0	0
2021/04/26 12:19:01	小学/三年级/三年级二班	3	0	9	0	1	1	2	2	2	0	0
2021/04/26 12:16:35	小学/三年级/三年级二班	3	0	9	0	2	2	1	2	4	0	0
2021/04/26 12:18:00	小学/三年级/三年级二班	3	1	10	0	2	2	2	3	0	0	0
2021/04/26 12:16:52	小学/三年级/三年级二班	3	1	9	0	2	2	2	3	0	1	1
2021/04/26 12:19:19	小学/三年级/三年级二班	3	1	9	0	1	1	1	3	0	1	1
2021/04/26 12:17:47	小学/三年级/三年级二班	3	0	10	0	1	2	0	2	4	0	0
2021/04/26 12:16:22	小学/三年级/三年级二班	3	0	9	0	2	2	1	3	0	0	0
2021/04/26 12:16:14	小学/三年级/三年级二班	3	0	10	1	2	1	1	2	2	0	0
2021/04/26 12:16:22	小学/三年级/三年级二班	3	0	10	0	2	1	2	2	2	0	0
2021/04/26 12:21:10	小学/三年级/三年级二班	3	1	9	0	2	2	0	2	1	1	0
2021/04/26 12:15:45	小学/三年级/三年级二班	3	0	10	0	1	0	2	2	1	0	0
2021/04/26 12:15:50	小学/三年级/三年级二班	3	0	9	0	2	2	2	3	0	0	0
2021/04/26 12:15:18	小学/三年级/三年级二班	3	0	10	0	2	1	1	2	3	1	1
2021/04/26 12:10:53	小学/三年级/三年级三班	3	0	10	0	2	2	2	3	0	0	0
2021/04/26 12:08:47	小学/三年级/三年级三班	3	0	10	0	2	1	2	3	0	0	0
2021/04/26 12:08:01	小学/三年级/三年级三班	3	0	9	0	2	0	0	3	0	0	1
2021/04/26 12:07:24	小学/三年级/三年级三班	3	1	9	0	2	1	2	3	0	0	0
2021/04/26 12:07:40	小学/三年级/三年级三班	3	0	10	0	1	1	2	2	1	0	0
2021/04/26 12:09:15	小学/三年级/三年级三班	3	0	10	0	2	2	2	3	0	0	0
2021/04/26 12:06:53	小学/三年级/三年级三班	3	1	10	0	2	1	1	1	4	0	1
2021/04/26 12:06:26	小学/三年级/三年级三班	3	1	9	0	1	0	1	2	1	1	1
2021/04/26 12:07:24	小学/三年级/三年级三班	3	1	9	0	2	2	2	3	0	0	0
2021/04/26 12:06:50	小学/三年级/三年级三班	3	1	9	0	1	1	2	2	3	0	1
2021/04/26 12:05:35	小学/三年级/三年级三班	3	0	9	0	2	1	2	2	4	0	0
2021/04/26 12:05:10	小学/三年级/三年级三班	3	1	9	0	1	0	1	2	1	0	0
2021/04/26 12:03:11	小学/三年级/三年级三班	3	0	10	0	1	2	1	3	0	0	0
2021/04/26 12:02:40	小学/三年级/三年级三班	3	0	10	0	2	2	1	3	0	0	0
2021/04/26 12:02:46	小学/三年级/三年级三班	3	1	9	0	2	1	1	2	2	0	0
2021/04/26 12:02:14	小学/三年级/三年级三班	3	0	10	0	2	1	2	3	0	0	0
2021/04/26 12:05:10	小学/三年级/三年级三班	3	1	9	0	1	2	2	1	1	1	1
2021/04/26 12:02:19	小学/三年级/三年级三班	3	0	9	0	2	2	2	2	4	0	0
2021/04/26 12:02:39	小学/三年级/三年级三班	3	1	10	0	2	1	2	3	0	0	0
2021/04/26 12:01:09	小学/三年级/三年级三班	3	0	9	0	2	1	2	3	0	0	1
2021/04/26 12:03:06	小学/三年级/三年级三班	3	1	9	0	2	2	2	3	0	0	0
2021/04/26 12:01:09	小学/三年级/三年级三班	3	1	10	0	2	2	2	2	1	0	0
2021/04/26 12:02:06	小学/三年级/三年级三班	3	1	9	0	2	1	1	2	4	0	0
2021/04/26 12:00:18	小学/三年级/三年级三班	3	0	10	0	1	0	0	3	0	1	1
2021/04/26 12:01:42	小学/三年级/三年级三班	3	1	9	0	2	2	1	2	3	0	0
2021/04/26 12:03:31	小学/三年级/三年级三班	3	1	10	0	2	1	1	2	1	0	0
2021/04/26 12:01:21	小学/三年级/三年级三班	3	0	9	0	2	2	1	2	2	0	0
2021/04/26 12:02:44	小学/三年级/三年级三班	3	1	9	0	2	1	1	1	4	0	0
2021/04/26 12:03:52	小学/三年级/三年级三班	3	1	9	0	2	2	2	2	4	0	0
2021/04/26 12:00:28	小学/三年级/三年级三班	3	0	9	0	1	2	2	1	1	0	0
2021/04/26 12:00:39	小学/三年级/三年级三班	3	1	9	0	2	2	1	2	4	0	0
2021/04/26 12:00:54	小学/三年级/三年级三班	3	1	10	0	2	1	1	3	0	0	0
2021/04/26 12:02:40	小学/三年级/三年级三班	3	1	9	0	2	1	0	3	0	0	1
2021/04/26 12:01:31	小学/三年级/三年级三班	3	1	9	0	2	2	1	2	4	0	0
2021/04/26 11:59:27	小学/三年级/三年级三班	3	0	9	0	2	2	2	3	0	0	0
2021/04/26 11:59:44	小学/三年级/三年级一班	3	1	9	0	2	1	2	3	0	0	0
2021/04/26 11:59:02	小学/三年级/三年级三班	3	0	10	0	2	1	1	2	1	0	0
2021/04/26 12:00:31	小学/三年级/三年级三班	3	0	9	0	1	1	2	1	2	0	0
2021/04/26 12:02:20	小学/三年级/三年级三班	3	1	10	0	2	1	1	2	1	0	0
2021/04/26 12:01:14	小学/三年级/三年级三班	3	1	9	0	2	2	2	3	0	0	0
2021/04/26 12:01:22	小学/三年级/三年级三班	3	1	9	0	2	1	1	2	1	0	0
2021/04/26 11:59:13	小学/三年级/三年级三班	3	0	9	0	2	2	2	3	0	0	0
2021/04/26 12:01:34	小学/三年级/三年级三班	3	0	10	0	2	1	1	0	1	1	1
2021/04/26 12:00:28	小学/三年级/三年级三班	3	0	9	0	2	1	1	2	1	0	0
2021/04/26 12:00:11	小学/三年级/三年级三班	3	0	9	0	2	2	2	2	4	0	0
2021/04/26 12:01:41	小学/三年级/三年级三班	3	0	10	0	1	2	0	3	0	0	0
2021/04/26 11:59:38	小学/三年级/三年级三班	3	0	9	0	1	2	1	2	4	0	0
2021/04/26 11:58:47	小学/三年级/三年级三班	3	0	9	0	2	1	2	3	0	0	0
2021/04/26 11:58:57	小学/三年级/三年级三班	3	0	9	0	1	0	0	2	4	1	1
2021/04/26 12:00:39	小学/三年级/三年级三班	3	0	9	0	2	1	1	2	1	0	1
2021/04/26 12:02:09	小学/三年级/三年级一班	3	1	10	0	1	1	2	3	0	0	0
2021/04/26 12:02:17	小学/三年级/三年级三班	3	0	9	0	1	1	1	2	2	1	1
2021/04/26 11:58:20	小学/三年级/三年级三班	3	0	10	0	2	1	1	2	2	1	0
2021/04/26 12:00:27	小学/三年级/三年级一班	3	1	9	0	2	2	2	1	1	0	0
2021/04/26 11:59:31	小学/三年级/三年级一班	3	0	10	0	2	2	2	2	2	0	0
2021/04/26 11:58:20	小学/三年级/三年级一班	3	0	9	0	2	1	1	2	2	0	0
2021/04/26 11:57:40	小学/三年级/三年级一班	3	1	10	0	2	2	2	2	1	0	0
2021/04/26 12:00:29	小学/三年级/三年级一班	3	1	10	0	2	2	2	1	1	0	0
2021/04/26 11:57:07	小学/三年级/三年级一班	3	0	9	0	1	2	2	2	1	0	0
2021/04/26 11:58:52	小学/三年级/三年级一班	3	1	9	0	2	1	2	2	1	0	0
2021/04/26 11:59:21	小学/三年级/三年级一班	3	1	10	0	2	2	1	3	0	0	0
2021/04/26 11:56:47	小学/三年级/三年级一班	3	0	9	0	2	1	1	3	0	1	0
2021/04/26 11:57:08	小学/三年级/三年级一班	3	1	10	0	2	1	1	3	0	0	0
2021/04/26 11:58:46	小学/三年级/三年级一班	3	0	9	0	2	1	2	2	2	0	0
2021/04/26 11:57:06	小学/三年级/三年级一班	3	1	10	0	2	1	1	3	0	0	0
2021/04/26 11:58:30	小学/三年级/三年级一班	3	1	9	0	2	2	1	3	0	0	0
2021/04/26 11:56:49	小学/三年级/三年级一班	3	1	10	0	2	2	1	0	1	0	1
2021/04/26 11:55:02	小学/三年级/三年级一班	3	0	9	0	2	1	1	2	4	0	0
2021/04/26 11:58:58	小学/三年级/三年级一班	3	1	10	0	2	1	2	2	1	0	0
2021/04/26 11:55:50	小学/三年级/三年级一班	3	0	10	0	2	0	1	3	0	0	0
2021/04/26 11:55:41	小学/三年级/三年级一班	3	0	9	0	2	1	1	2	2	0	0
2021/04/26 11:54:28	小学/三年级/三年级一班	3	0	9	0	2	0	2	3	0	0	0
2021/04/26 11:56:12	小学/三年级/三年级一班	3	0	9	0	1	1	1	3	0	1	0
2021/04/26 11:54:15	小学/三年级/三年级一班	3	0	10	0	1	1	1	2	1	0	0
2021/04/26 11:57:19	小学/三年级/三年级一班	3	1	10	0	2	1	1	2	1	0	0
2021/04/26 11:54:54	小学/三年级/三年级一班	3	0	10	0	2	2	1	2	2	0	0
2021/04/26 11:56:52	小学/三年级/三年级一班	3	1	9	0	2	2	2	3	0	0	0
2021/04/26 11:56:50	小学/三年级/三年级一班	3	1	9	0	2	1	2	2	4	0	0
2021/04/26 11:55:06	小学/三年级/三年级一班	3	1	10	0	1	1	2	2	1	0	0
2021/04/26 11:57:22	小学/三年级/三年级一班	3	1	9	0	2	1	1	2	1	0	0
2021/04/26 11:53:29	小学/三年级/三年级一班	3	0	9	0	1	0	1	2	4	0	0
2021/04/26 11:53:27	小学/三年级/三年级一班	3	0	9	0	2	2	0	3	0	0	1
2021/04/26 11:52:50	小学/三年级/三年级一班	3	0	9	0	2	2	2	2	2	0	0
2021/04/26 11:59:49	小学/三年级/三年级一班	3	1	9	0	2	2	2	3	0	0	0
2021/04/26 11:53:24	小学/三年级/三年级一班	3	0	9	0	2	2	1	2	1	0	0
2021/04/26 11:54:59	小学/三年级/三年级一班	3	0	9	0	1	1	2	3	0	1	0
2021/04/26 11:53:57	小学/三年级/三年级一班	3	1	9	1	2	1	2	2	3	0	0
2021/04/26 11:53:13	小学/三年级/三年级一班	3	0	9	0	2	0	2	2	1	1	0
2021/04/26 11:53:12	小学/三年级/三年级一班	3	0	10	0	2	1	1	2	4	0	0
2021/04/26 11:55:21	小学/三年级/三年级一班	3	1	10	0	2	2	2	2	1	0	0
2021/04/26 11:56:58	小学/三年级/三年级一班	3	1	9	0	1	1	1	3	0	0	0
2021/04/26 11:52:32	小学/三年级/三年级一班	3	0	9	0	2	1	2	2	1	0	0
2021/04/26 11:53:03	小学/三年级/三年级一班	3	0	9	0	2	1	1	2	4	0	0
2021/04/26 11:52:55	小学/三年级/三年级一班	3	0	10	0	1	1	1	2	1	1	1
2021/04/26 11:54:36	小学/三年级/三年级一班	3	1	9	0	2	1	1	3	0	0	0
2021/04/26 11:52:53	小学/三年级/三年级一班	3	0	10	0	2	1	2	2	1	0	0
2021/04/26 11:54:26	小学/三年级/三年级一班	3	0	10	0	2	1	1	2	2	0	0
2021/04/26 11:51:54	小学/三年级/三年级一班	3	1	9	0	2	1	2	2	1	0	0
2021/04/26 11:53:53	小学/三年级/三年级一班	3	0	10	0	1	1	2	2	1	0	0
2021/04/26 11:54:10	小学/三年级/三年级一班	3	0	9	0	2	2	2	1	3	0	0
2021/04/26 10:41:05	小学/三年级/三年级十一班	3	1	9	0	2	1	1	2	1	0	0
2021/04/26 10:40:13	小学/三年级/三年级十一班	3	0	10	0	2	1	1	3	0	0	1
2021/04/26 10:40:12	小学/三年级/三年级十一班	3	1	10	0	2	2	1	3	0	0	0
2021/04/26 10:38:29	小学/三年级/三年级十一班	3	1	9	0	2	1	1	2	3	0	0
2021/04/26 10:38:44	小学/三年级/三年级十一班	3	1	9	0	2	2	2	3	0	0	0
2021/04/26 10:38:13	小学/三年级/三年级十一班	3	0	9	0	1	1	1	2	4	0	0
2021/04/26 10:39:09	小学/三年级/三年级十一班	3	1	9	0	1	1	1	3	0	0	0
2021/04/26 10:37:30	小学/三年级/三年级十一班	3	0	10	0	1	1	1	3	0	0	0
2021/04/26 10:37:17	小学/三年级/三年级十一班	3	1	9	0	1	1	1	3	0	0	0
2021/04/26 10:36:19	小学/三年级/三年级十一班	3	0	9	1	1	0	1	2	2	0	1
2021/04/26 10:36:22	小学/三年级/三年级十一班	3	0	9	0	2	0	1	2	2	1	0
2021/04/26 10:37:51	小学/三年级/三年级十一班	3	1	9	0	1	1	2	3	0	0	0
2021/04/26 10:37:57	小学/三年级/三年级十一班	3	0	10	0	1	1	1	2	4	1	1
2021/04/26 10:34:46	小学/三年级/三年级十一班	3	0	9	0	2	2	2	3	0	0	0
2021/04/26 10:36:53	小学/三年级/三年级十一班	3	1	9	0	2	2	2	2	1	0	0
2021/04/26 10:39:42	小学/三年级/三年级十一班	3	1	9	0	2	2	1	2	4	0	0
2021/04/26 10:36:23	小学/三年级/三年级十一班	3	1	10	0	2	2	2	3	0	0	0
2021/04/26 10:36:33	小学/三年级/三年级十一班	3	0	9	0	2	1	1	2	2	1	0
2021/04/26 10:35:46	小学/三年级/三年级十一班	3	0	9	0	1	1	1	2	1	0	0
2021/04/26 10:35:25	小学/三年级/三年级十一班	3	1	9	0	2	1	2	3	0	0	0
2021/04/26 10:32:19	小学/三年级/三年级十班	3	0	10	0	2	2	1	3	0	0	0
2021/04/26 10:35:41	小学/三年级/三年级十一班	3	1	9	0	2	1	2	3	0	0	0
2021/04/26 10:35:24	小学/三年级/三年级十一班	3	1	9	0	2	1	1	3	0	0	0
2021/04/26 10:37:27	小学/三年级/三年级十一班	3	1	9	0	2	1	1	3	0	0	0
2021/04/26 10:35:38	小学/三年级/三年级十一班	3	1	9	0	2	1	1	3	0	0	0
2021/04/26 10:35:34	小学/三年级/三年级十一班	3	1	9	0	2	2	1	3	0	0	0
2021/04/26 10:31:04	小学/三年级/三年级十一班	3	0	9	0	1	2	2	2	4	0	0
2021/04/26 10:31:12	小学/三年级/三年级十一班	3	0	9	0	2	0	2	3	0	0	0
2021/04/26 10:30:57	小学/三年级/三年级十一班	3	0	9	0	1	0	0	2	4	1	1
2021/04/26 10:30:50	小学/三年级/三年级十一班	3	0	9	0	2	2	1	2	4	1	0
2021/04/26 10:31:33	小学/三年级/三年级十一班	3	0	9	0	1	1	1	2	3	0	0
2021/04/26 10:32:48	小学/三年级/三年级十一班	3	0	9	0	2	1	2	1	3	1	1
2021/04/26 10:34:44	小学/三年级/三年级十一班	3	0	9	0	2	1	1	2	4	1	0
2021/04/26 10:31:43	小学/三年级/三年级十一班	3	0	9	0	2	1	2	2	2	0	0
2021/04/26 10:31:18	小学/三年级/三年级十一班	3	0	9	0	2	2	1	3	0	0	0
2021/04/26 10:35:32	小学/三年级/三年级十一班	3	1	9	0	1	0	2	1	1	1	1
2021/04/26 10:30:36	小学/三年级/三年级十一班	3	0	10	0	2	1	1	2	4	0	0
2021/04/26 10:29:35	小学/三年级/三年级十班	3	0	10	0	2	2	1	1	3	0	0
2021/04/26 10:34:45	小学/三年级/三年级十一班	3	1	9	0	2	2	1	3	0	0	0
2021/04/26 10:31:24	小学/三年级/三年级十一班	3	0	9	0	1	1	2	2	1	0	0
2021/04/26 10:30:58	小学/三年级/三年级十一班	3	0	9	0	2	1	1	2	1	1	0
2021/04/26 10:29:18	小学/三年级/三年级十班	3	1	10	0	2	1	1	3	0	0	0
2021/04/26 10:35:25	小学/三年级/三年级十一班	3	1	10	0	2	1	2	2	1	0	0
2021/04/26 10:30:39	小学/三年级/三年级十一班	3	1	9	0	1	2	2	2	1	0	0
2021/04/26 10:30:17	小学/三年级/三年级十一班	3	1	9	0	1	2	1	3	0	0	0
2021/04/26 10:28:59	小学/三年级/三年级十一班	3	0	10	0	1	1	1	2	2	0	0
2021/04/26 10:29:21	小学/三年级/三年级十一班	3	0	9	0	2	1	1	3	0	0	0
2021/04/26 10:28:44	小学/三年级/三年级十班	3	1	9	0	0	1	2	0	1	1	1
2021/04/26 10:30:40	小学/三年级/三年级十一班	3	0	9	0	2	2	2	3	0	0	0
2021/04/26 10:30:46	小学/三年级/三年级十一班	3	0	9	0	2	1	1	2	1	0	0
2021/04/26 10:28:41	小学/三年级/三年级十班	3	0	9	0	2	2	2	1	3	0	0
2021/04/26 10:28:30	小学/三年级/三年级十一班	3	0	10	0	2	0	1	2	1	1	0
2021/04/26 10:28:37	小学/三年级/三年级十班	3	0	10	0	1	1	2	3	0	1	1
2021/04/26 10:28:29	小学/三年级/三年级十班	3	0	10	0	1	1	1	0	3	0	1
2021/04/26 10:28:40	小学/三年级/三年级十班	3	1	9	0	1	1	2	2	3	0	1
2021/04/26 10:27:22	小学/三年级/三年级十班	3	0	9	1	2	2	1	3	0	0	0
2021/04/26 10:27:36	小学/三年级/三年级十班	3	1	9	0	2	1	2	3	0	0	0
2021/04/26 10:26:09	小学/三年级/三年级十班	3	0	10	0	2	0	1	1	1	0	0
2021/04/26 10:24:52	小学/三年级/三年级十班	3	0	9	1	2	1	1	1	4	0	1
2021/04/26 10:25:15	小学/三年级/三年级十班	3	0	10	0	0	0	1	2	1	1	0
2021/04/26 10:27:20	小学/三年级/三年级十班	3	1	9	0	1	2	2	2	1	0	0
2021/04/26 10:26:17	小学/三年级/三年级十班	3	1	9	0	2	2	1	2	2	0	0
2021/04/26 10:25:39	小学/三年级/三年级十班	3	1	9	0	1	1	2	2	3	0	0
2021/04/26 10:23:49	小学/三年级/三年级十班	3	0	10	0	2	1	1	2	1	0	0
2021/04/26 10:25:28	小学/三年级/三年级十班	3	1	9	0	2	2	2	3	0	0	0
2021/04/26 10:27:08	小学/三年级/三年级十班	3	1	9	0	2	2	2	3	0	0	0
2021/04/26 10:24:06	小学/三年级/三年级十班	3	1	9	0	1	1	1	2	2	0	0
2021/04/26 10:25:10	小学/三年级/三年级十班	3	1	9	0	1	1	2	3	0	0	1
2021/04/26 10:25:19	小学/三年级/三年级十班	3	1	9	0	1	2	2	2	1	1	0
2021/04/26 10:23:28	小学/三年级/三年级十班	3	0	10	0	2	2	1	1	1	0	0
2021/04/26 10:25:51	小学/三年级/三年级十班	3	1	9	0	1	1	2	2	1	0	0
2021/04/26 10:25:52	小学/三年级/三年级十班	3	1	10	0	2	1	1	1	2	0	1
2021/04/26 10:24:17	小学/三年级/三年级十班	3	1	9	0	2	1	2	0	3	0	0
2021/04/26 10:25:11	小学/三年级/三年级十班	3	1	9	0	2	2	1	2	1	1	0
2021/04/26 10:23:44	小学/三年级/三年级十班	3	1	9	0	2	2	2	3	0	0	0
2021/04/26 10:23:24	小学/三年级/三年级十班	3	1	10	0	1	0	1	2	1	1	1
2021/04/26 10:22:41	小学/三年级/三年级十班	3	0	10	0	1	2	2	1	1	1	0
2021/04/26 10:24:10	小学/三年级/三年级十班	3	0	9	0	2	1	1	2	1	0	0
2021/04/26 10:24:22	小学/三年级/三年级十班	3	1	9	0	2	2	1	3	0	0	0
2021/04/26 10:25:39	小学/三年级/三年级十班	3	1	9	0	2	2	1	2	4	0	0
2021/04/26 10:22:17	小学/三年级/三年级十班	3	1	9	0	1	1	1	2	2	0	0
2021/04/26 10:22:45	小学/三年级/三年级十班	3	0	9	0	1	2	0	2	1	0	0
2021/04/26 10:27:10	小学/三年级/三年级十班	3	1	9	0	2	1	1	2	1	0	0
2021/04/26 10:21:43	小学/三年级/三年级十班	3	0	10	0	2	2	2	2	1	0	0
2021/04/26 10:22:12	小学/三年级/三年级十班	3	0	10	0	2	2	1	3	0	0	0
2021/04/26 10:22:45	小学/三年级/三年级十班	3	0	9	1	1	2	2	2	1	0	0
2021/04/26 10:22:41	小学/三年级/三年级十班	3	0	9	0	2	2	2	3	0	0	0
2021/04/26 10:22:17	小学/三年级/三年级十班	3	0	9	0	1	2	1	2	1	0	0
2021/04/26 10:23:57	小学/三年级/三年级十班	3	0	9	0	2	2	1	2	1	0	0
2021/04/26 10:27:47	小学/三年级/三年级十班	3	0	9	0	2	1	0	2	1	0	0
2021/04/26 10:21:36	小学/三年级/三年级十班	3	0	10	0	2	1	2	2	3	0	0
2021/04/26 10:20:58	小学/三年级/三年级十班	3	0	10	0	1	2	2	3	0	1	0
2021/04/26 10:20:39	小学/三年级/三年级十班	3	0	10	0	2	1	1	2	2	0	0
2021/04/26 10:25:47	小学/三年级/三年级十班	3	0	10	1	2	2	2	0	1	1	1
2021/04/26 10:26:19	小学/三年级/三年级十班	3	0	9	0	1	1	0	1	2	0	0
2021/04/14 13:22:01	小学/三年级/三年级五班	3	1	9	0	2	2	2	3	0	0	0
2021/04/14 13:18:02	小学/三年级/三年级五班	3	1	9	0	1	0	1	0	2	1	1
2021/04/14 13:16:37	小学/三年级/三年级二班	3	0	10	0	1	1	1	1	3	1	1
2021/04/14 13:18:01	小学/三年级/三年级二班	3	0	9	0	2	1	1	2	4	0	0
2021/04/14 13:16:24	小学/三年级/三年级二班	3	0	9	0	2	1	2	3	0	0	0
2021/04/14 13:14:07	小学/三年级/三年级二班	3	1	9	0	2	1	2	2	3	0	1
2021/04/14 13:12:16	小学/三年级/三年级五班	3	0	10	0	2	2	2	2	1	0	0
2021/04/14 13:15:48	小学/三年级/三年级二班	3	1	9	1	1	1	1	2	4	0	0
2021/04/14 13:12:13	小学/三年级/三年级五班	3	1	9	1	1	2	2	2	4	1	0
2021/04/14 13:12:43	小学/三年级/三年级二班	3	1	9	0	2	1	2	2	2	0	0
2021/04/14 13:15:37	小学/三年级/三年级五班	3	0	10	0	2	2	2	2	2	1	0
2021/04/14 13:11:42	小学/三年级/三年级五班	3	0	10	0	2	0	1	1	3	0	1
2021/04/14 13:15:37	小学/三年级/三年级五班	3	1	9	0	2	2	0	2	1	0	0
2021/04/14 13:11:59	小学/三年级/三年级五班	3	1	10	0	2	2	2	3	0	0	0
2021/04/14 13:08:50	小学/三年级/三年级五班	3	0	9	0	1	2	2	2	4	0	0
2021/04/14 13:08:28	小学/三年级/三年级五班	3	0	10	0	2	2	2	3	0	0	0
2021/04/14 13:08:38	小学/三年级/三年级二班	3	1	9	0	2	2	2	3	0	0	0
2021/04/14 13:08:23	小学/三年级/三年级二班	3	1	9	0	2	1	2	2	1	0	0
2021/04/14 13:10:26	小学/三年级/三年级五班	3	1	9	0	0	0	0	2	2	0	1
2021/04/14 13:08:06	小学/三年级/三年级五班	3	0	10	0	1	1	1	2	3	0	0
2021/04/14 13:08:59	小学/三年级/三年级二班	3	1	9	0	2	2	1	3	0	0	0
2021/04/14 13:08:35	小学/三年级/三年级二班	3	0	9	0	0	2	2	0	2	0	1
2021/04/14 13:08:27	小学/三年级/三年级五班	3	0	9	0	2	2	2	3	0	0	0
2021/04/14 13:07:56	小学/三年级/三年级二班	3	1	9	0	2	2	2	3	0	0	0
2021/04/14 13:08:10	小学/三年级/三年级二班	3	0	9	0	1	2	2	2	1	0	0
2021/04/14 13:07:25	小学/三年级/三年级五班	3	1	10	0	1	2	2	2	3	0	1
2021/04/14 13:09:40	小学/三年级/三年级二班	3	1	9	0	2	1	2	3	0	0	0
2021/04/14 13:07:42	小学/三年级/三年级二班	3	1	9	0	2	2	2	0	1	0	0
2021/04/14 13:11:07	小学/三年级/三年级五班	3	1	9	0	2	2	2	3	0	0	0
2021/04/14 13:06:57	小学/三年级/三年级五班	3	0	10	0	1	1	2	2	1	1	1
2021/04/14 13:05:53	小学/三年级/三年级二班	3	0	9	0	1	2	1	2	1	0	0
2021/04/14 13:04:37	小学/三年级/三年级五班	3	0	10	0	2	1	2	3	0	0	0
2021/04/14 13:08:13	小学/三年级/三年级二班	3	1	9	0	1	2	2	2	1	0	0
2021/04/14 13:06:20	小学/三年级/三年级五班	3	0	10	0	2	1	1	2	4	0	0
2021/04/14 13:07:43	小学/三年级/三年级五班	3	1	9	0	1	1	1	2	4	0	0
2021/04/14 13:06:05	小学/三年级/三年级五班	3	1	9	0	2	2	1	3	0	0	0
2021/04/14 13:08:01	小学/三年级/三年级二班	3	1	9	0	1	1	1	3	0	1	0
2021/04/14 13:03:55	小学/三年级/三年级五班	3	0	10	0	2	1	2	3	0	0	0
2021/04/14 13:04:46	小学/三年级/三年级五班	3	0	10	0	2	2	1	2	4	0	0
2021/04/14 13:04:14	小学/三年级/三年级五班	3	1	9	0	2	0	2	3	0	0	1
2021/04/14 13:05:46	小学/三年级/三年级二班	3	1	9	0	2	2	2	2	4	0	0
2021/04/14 13:04:21	小学/三年级/三年级二班	3	0	10	0	2	2	1	2	4	0	0
2021/04/14 13:04:13	小学/三年级/三年级五班	3	1	9	0	2	2	2	2	1	0	0
2021/04/14 13:05:50	小学/三年级/三年级五班	3	1	10	0	1	0	1	3	0	0	0
2021/04/14 13:06:21	小学/三年级/三年级二班	3	1	9	0	2	2	1	3	0	0	0
2021/04/14 13:04:44	小学/三年级/三年级五班	3	0	9	0	2	1	2	2	4	0	0
2021/04/14 13:05:05	小学/三年级/三年级二班	3	0	10	0	2	1	2	3	0	0	0
2021/04/14 13:03:15	小学/三年级/三年级二班	3	0	9	0	1	2	2	3	0	0	0
2021/04/14 13:08:17	小学/三年级/三年级二班	3	1	9	0	2	2	1	3	0	0	0
2021/04/14 13:01:59	小学/三年级/三年级二班	3	0	9	0	2	2	2	3	0	0	0
2021/04/14 13:03:15	小学/三年级/三年级二班	3	0	9	0	2	2	2	1	1	0	1
2021/04/14 13:02:29	小学/三年级/三年级二班	3	0	10	0	2	2	1	2	1	0	0
2021/04/14 13:02:03	小学/三年级/三年级二班	3	1	9	0	2	1	1	3	0	0	0
2021/04/14 13:01:46	小学/三年级/三年级二班	3	0	10	0	2	2	2	2	2	0	0
2021/04/13 10:24:34	小学/三年级/三年级四班	3	0	9	0	1	1	2	2	2	0	1
2021/04/13 10:23:06	小学/三年级/三年级四班	3	0	9	0	2	2	1	3	0	0	0
2021/04/13 10:23:24	小学/三年级/三年级六班	3	0	9	1	1	1	2	2	2	0	1
2021/04/13 10:19:47	小学/三年级/三年级六班	3	0	9	0	0	2	0	3	0	0	1
2021/04/13 10:20:27	小学/三年级/三年级四班	3	0	9	0	2	1	1	2	2	0	0
2021/04/13 10:23:37	小学/三年级/三年级六班	3	1	9	0	2	1	1	3	0	0	1
2021/04/13 10:21:19	小学/三年级/三年级四班	3	0	10	0	1	1	1	1	3	0	0
2021/04/13 10:20:45	小学/三年级/三年级四班	3	1	9	0	1	1	2	3	0	0	0
2021/04/13 10:20:42	小学/三年级/三年级四班	3	0	10	0	1	1	1	3	0	0	0
2021/04/13 10:22:19	小学/三年级/三年级六班	3	0	10	0	2	2	1	0	2	0	1
2021/04/13 10:22:48	小学/三年级/三年级四班	3	1	10	0	2	1	2	3	0	0	0
2021/04/13 10:19:56	小学/三年级/三年级四班	3	1	9	0	1	2	2	2	4	0	0
2021/04/13 10:19:14	小学/三年级/三年级四班	3	1	9	0	2	2	2	3	0	0	0
2021/04/13 10:19:25	小学/三年级/三年级四班	3	1	9	0	2	2	1	3	0	0	0
2021/04/13 10:19:06	小学/三年级/三年级四班	3	0	9	0	1	1	1	3	0	0	0
2021/04/13 10:18:36	小学/三年级/三年级四班	3	1	9	0	1	2	2	0	3	0	1
2021/04/13 10:23:06	小学/三年级/三年级六班	3	1	10	0	2	2	2	2	1	0	0
2021/04/13 10:19:32	小学/三年级/三年级四班	3	0	10	0	2	1	1	3	0	1	0
2021/04/13 10:17:53	小学/三年级/三年级四班	3	0	10	0	1	1	2	2	4	0	0
2021/04/13 10:18:46	小学/三年级/三年级四班	3	0	9	0	2	2	1	3	0	0	0
2021/04/13 10:18:37	小学/三年级/三年级四班	3	0	9	0	1	1	2	2	1	0	0
2021/04/13 10:19:13	小学/三年级/三年级四班	3	0	9	0	2	1	2	3	0	0	0
2021/04/13 10:20:08	小学/三年级/三年级四班	3	1	10	0	2	2	1	3	0	0	0
2021/04/13 10:17:17	小学/三年级/三年级四班	3	0	10	0	2	1	2	2	4	0	0
2021/04/13 10:17:44	小学/三年级/三年级六班	3	1	9	0	2	1	2	2	4	0	0
2021/04/13 10:20:01	小学/三年级/三年级四班	3	1	9	0	2	2	2	2	4	0	0
2021/04/13 10:19:01	小学/三年级/三年级四班	3	1	9	0	2	1	2	3	0	0	0
2021/04/13 10:19:40	小学/三年级/三年级四班	3	0	9	0	1	2	2	2	4	0	0
2021/04/13 10:18:04	小学/三年级/三年级四班	3	1	9	0	2	2	2	3	0	0	0
2021/04/13 10:19:55	小学/三年级/三年级四班	3	1	9	0	1	2	2	2	4	0	0
2021/04/13 10:19:56	小学/三年级/三年级四班	3	1	9	1	2	1	1	2	4	1	0
2021/04/13 10:19:00	小学/三年级/三年级四班	3	1	9	0	2	2	2	3	0	0	0
2021/04/13 10:19:55	小学/三年级/三年级四班	3	1	10	1	1	1	1	2	4	1	0
2021/04/13 10:19:14	小学/三年级/三年级六班	3	1	9	1	2	2	1	2	4	0	0
2021/04/13 10:17:43	小学/三年级/三年级四班	3	0	10	0	2	1	2	3	0	0	0
2021/04/13 10:20:30	小学/三年级/三年级六班	3	0	10	0	1	1	1	1	3	0	0
2021/04/13 10:18:27	小学/三年级/三年级六班	3	1	9	0	2	1	1	3	0	0	0
2021/04/13 10:21:34	小学/三年级/三年级六班	3	0	9	1	0	1	2	0	1	1	1
2021/04/13 10:19:14	小学/三年级/三年级六班	3	0	10	0	2	2	2	3	0	1	0
2021/04/13 10:16:49	小学/三年级/三年级六班	3	0	9	0	2	2	2	3	0	0	0
2021/04/13 10:15:31	小学/三年级/三年级六班	3	0	9	0	1	2	1	1	3	0	0
2021/04/13 10:17:19	小学/三年级/三年级六班	3	1	9	0	2	2	1	3	0	0	0
2021/04/13 10:19:49	小学/三年级/三年级六班	3	0	10	0	2	1	1	2	3	0	0
2021/04/13 10:21:15	小学/三年级/三年级六班	3	1	9	0	1	1	1	2	4	1	1
2021/04/13 10:16:40	小学/三年级/三年级六班	3	0	9	0	2	1	1	2	1	0	0
2021/04/13 10:15:52	小学/三年级/三年级六班	3	1	10	0	2	2	1	2	1	0	0
2021/04/13 10:14:28	小学/三年级/三年级六班	3	0	9	0	2	1	1	2	2	0	0
2021/04/13 10:15:01	小学/三年级/三年级六班	3	0	9	1	1	0	2	1	3	0	1
2021/04/13 10:15:13	小学/三年级/三年级六班	3	1	9	0	2	1	0	2	4	0	0
2021/04/13 10:19:26	小学/三年级/三年级六班	3	1	9	0	2	1	2	3	0	1	0
2021/04/13 10:19:19	小学/三年级/三年级六班	3	1	9	0	2	1	2	3	0	1	0
2021/04/13 10:15:14	小学/三年级/三年级六班	3	1	9	0	2	2	2	2	4	1	0
2021/04/13 10:17:30	小学/三年级/三年级六班	3	1	9	0	2	1	2	3	0	0	0
2021/04/13 10:12:57	小学/三年级/三年级六班	3	0	9	0	2	1	2	2	4	0	0
2021/04/09 11:44:18	小学/三年级/三年级一班	3	1	9	0	2	1	2	3	0	0	0
2021/04/09 11:44:47	小学/三年级/三年级一班	3	0	10	0	1	1	1	0	1	0	0
2021/04/09 11:42:11	小学/三年级/三年级一班	3	0	9	1	2	1	2	2	1	0	0
2021/04/09 11:41:47	小学/三年级/三年级一班	3	1	9	0	2	2	2	3	0	0	0
2021/04/09 11:43:29	小学/三年级/三年级一班	3	1	9	0	2	1	2	2	1	0	0
2021/04/09 11:42:22	小学/三年级/三年级一班	3	0	9	1	2	2	2	3	0	0	0
2021/04/09 11:42:28	小学/三年级/三年级一班	3	0	9	0	1	2	2	1	1	0	0
2021/04/09 11:42:59	小学/三年级/三年级一班	3	1	9	0	2	2	2	3	0	0	0
2021/04/09 11:43:03	小学/三年级/三年级一班	3	0	10	0	2	2	2	3	0	0	0
2021/04/09 11:42:16	小学/三年级/三年级一班	3	1	9	0	1	1	1	2	1	0	0
2021/04/09 11:42:00	小学/三年级/三年级一班	3	1	10	0	1	0	2	2	1	0	1
2021/04/09 11:42:02	小学/三年级/三年级一班	3	0	9	0	1	2	1	3	0	0	0
2021/04/09 11:39:29	小学/三年级/三年级一班	3	0	9	0	2	2	2	2	4	1	0
2021/04/09 11:40:41	小学/三年级/三年级一班	3	0	9	0	2	2	1	3	0	0	0
2021/04/09 11:41:34	小学/三年级/三年级一班	3	1	9	1	2	1	1	2	1	0	0
2021/04/09 11:40:27	小学/三年级/三年级一班	3	1	10	0	1	1	2	3	0	0	1
2021/04/09 11:40:50	小学/三年级/三年级一班	3	0	9	0	1	1	2	2	1	0	1
2021/04/09 11:41:07	小学/三年级/三年级一班	3	1	9	0	2	1	1	3	0	0	0
2021/04/09 11:38:46	小学/三年级/三年级一班	3	1	10	0	2	2	2	2	4	0	0
2021/04/09 11:40:15	小学/三年级/三年级一班	3	1	9	0	2	2	1	3	0	0	0
2021/04/09 11:41:16	小学/三年级/三年级一班	3	1	9	0	1	1	1	3	0	0	0
2021/04/09 11:37:42	小学/三年级/三年级一班	3	0	9	0	1	0	2	0	4	1	1
2021/04/09 11:39:15	小学/三年级/三年级一班	3	0	9	0	2	2	2	3	0	0	0
2021/04/09 11:37:31	小学/三年级/三年级一班	3	0	9	0	0	2	2	3	0	1	0
2021/04/09 11:39:36	小学/三年级/三年级一班	3	1	9	1	2	1	1	3	0	0	0
2021/04/09 11:36:12	小学/三年级/三年级一班	3	0	9	0	2	2	1	2	1	0	0
2021/04/09 11:14:00	小学/三年级/三年级三班	3	1	9	0	2	2	2	2	1	0	0
2021/04/09 11:12:29	小学/三年级/三年级三班	3	0	9	0	1	2	1	2	3	0	0
2021/04/09 11:16:57	小学/三年级/三年级三班	3	0	9	0	2	2	0	3	0	0	0
2021/04/09 11:09:27	小学/三年级/三年级三班	3	0	9	0	1	1	2	3	0	0	0
2021/04/09 11:10:08	小学/三年级/三年级三班	3	1	9	0	2	2	1	3	0	0	0
2021/04/09 11:08:53	小学/三年级/三年级三班	3	0	10	0	2	0	2	0	2	0	0
2021/04/09 11:09:42	小学/三年级/三年级三班	3	1	9	0	1	2	1	2	1	0	0
2021/04/09 11:10:21	小学/三年级/三年级三班	3	0	9	0	1	2	1	2	1	0	0
2021/04/09 11:08:55	小学/三年级/三年级三班	3	1	9	0	1	1	2	3	0	1	0
2021/04/09 11:10:50	小学/三年级/三年级三班	3	1	9	0	1	1	1	2	4	0	0
2021/04/09 11:07:47	小学/三年级/三年级三班	3	1	9	0	2	2	1	3	0	0	0
2021/04/09 11:08:20	小学/三年级/三年级三班	3	1	10	0	2	1	0	2	2	0	0
2021/04/09 11:06:07	小学/三年级/三年级三班	3	0	9	1	2	2	0	3	0	0	0
2021/04/09 11:05:43	小学/三年级/三年级三班	3	0	10	1	2	2	2	2	1	0	0
2021/04/09 11:05:58	小学/三年级/三年级三班	3	0	10	0	2	2	1	2	1	1	0
2021/04/09 11:05:30	小学/三年级/三年级三班	3	0	9	0	2	2	1	2	1	0	0
2021/04/09 11:07:51	小学/三年级/三年级三班	3	1	9	0	2	1	1	3	0	0	0
2021/04/09 11:11:22	小学/三年级/三年级三班	3	1	9	0	1	1	0	2	4	0	0
2021/04/09 11:05:34	小学/三年级/三年级三班	3	1	9	0	2	1	2	3	0	0	0
2021/04/09 11:05:37	小学/三年级/三年级三班	3	1	10	0	2	2	1	3	0	0	0
2021/04/09 11:05:46	小学/三年级/三年级三班	3	0	10	0	2	1	2	3	0	0	1
2021/04/09 11:05:16	小学/三年级/三年级三班	3	0	10	0	1	1	2	2	4	0	0
2021/04/09 11:11:42	小学/三年级/三年级三班	3	1	9	0	1	0	1	2	1	1	1
2021/04/09 11:04:52	小学/三年级/三年级三班	3	0	10	0	2	1	1	2	4	1	0
2021/04/09 11:03:32	小学/三年级/三年级三班	3	0	10	0	2	2	1	3	0	0	0
2021/04/09 11:02:50	小学/三年级/三年级三班	3	0	9	0	2	2	0	2	1	0	0
2021/04/09 11:03:21	小学/三年级/三年级三班	3	1	9	0	2	2	2	3	0	0	0
2021/04/21 10:06:00	小学/三年级/三年级八班	3	0	9	0	2	2	2	3	0	0	0
2021/04/21 10:05:39	小学/三年级/三年级八班	3	0	9	0	2	2	1	3	0	0	0
2021/04/21 10:07:19	小学/三年级/三年级八班	3	1	10	0	1	1	2	3	0	0	0
2021/04/21 10:04:42	小学/三年级/三年级八班	3	1	9	1	2	0	2	0	3	0	1
2021/04/21 10:04:26	小学/三年级/三年级八班	3	1	9	0	2	1	2	2	4	0	0
2021/04/21 10:05:08	小学/三年级/三年级八班	3	1	10	0	1	0	2	2	1	1	1
2021/04/21 10:03:22	小学/三年级/三年级八班	3	1	9	0	2	1	1	3	0	0	0
2021/04/21 10:03:30	小学/三年级/三年级八班	3	1	9	1	2	1	1	3	0	0	0
2021/04/21 10:04:18	小学/三年级/三年级八班	3	1	9	0	2	1	2	2	4	0	0
2021/04/21 10:03:51	小学/三年级/三年级八班	3	1	9	0	2	2	2	2	1	0	0
2021/04/21 10:07:49	小学/三年级/三年级八班	3	1	9	0	0	1	1	2	3	0	1
2021/04/21 10:02:40	小学/三年级/三年级八班	3	0	10	1	2	1	2	3	0	0	0
2021/04/21 10:03:38	小学/三年级/三年级八班	3	1	9	0	2	1	1	3	0	0	0
2021/04/21 10:01:37	小学/三年级/三年级八班	3	1	9	0	2	2	1	3	0	0	0
2021/04/21 10:00:58	小学/三年级/三年级八班	3	0	9	0	2	2	2	3	0	1	0
2021/04/21 10:02:45	小学/三年级/三年级八班	3	0	10	0	2	0	1	3	0	0	1
2021/04/21 10:01:25	小学/三年级/三年级八班	3	0	10	1	2	2	1	1	1	0	0
2021/04/21 10:02:11	小学/三年级/三年级八班	3	0	9	1	0	0	2	0	2	1	1
2021/04/21 10:01:13	小学/三年级/三年级八班	3	0	10	0	2	2	2	1	1	1	0
2021/04/21 10:02:38	小学/三年级/三年级八班	3	0	10	0	2	1	2	3	0	1	0
2021/04/21 10:03:36	小学/三年级/三年级八班	3	1	10	1	2	2	1	3	0	0	0
2021/04/21 10:02:15	小学/三年级/三年级八班	3	1	10	0	2	1	2	3	0	0	0
2021/04/21 10:03:38	小学/三年级/三年级八班	3	1	9	1	2	1	1	3	0	0	0
2021/04/21 10:02:37	小学/三年级/三年级八班	3	0	10	1	1	2	2	2	1	0	0
2021/04/21 10:02:33	小学/三年级/三年级八班	3	1	10	0	2	2	2	3	0	0	0
2021/04/21 10:03:01	小学/三年级/三年级八班	3	1	10	0	1	1	1	3	0	0	1
2021/04/21 10:00:03	小学/三年级/三年级八班	3	0	10	0	2	2	2	3	0	0	0
2021/04/21 10:00:23	小学/三年级/三年级八班	3	0	9	0	2	1	2	3	0	0	0
2021/04/21 10:02:26	小学/三年级/三年级八班	3	1	9	0	2	1	1	1	1	0	0
2021/04/21 10:02:06	小学/三年级/三年级八班	3	0	10	1	2	2	2	2	1	0	0
2021/04/21 10:01:12	小学/三年级/三年级八班	3	1	10	0	2	1	1	2	2	0	0
2021/04/21 10:02:26	小学/三年级/三年级八班	3	1	9	0	1	1	1	3	0	0	0
2021/04/21 10:01:54	小学/三年级/三年级八班	3	1	10	0	2	1	2	3	0	1	0
2021/04/21 09:59:39	小学/三年级/三年级八班	3	0	9	0	2	1	1	3	0	0	0
2021/04/21 10:02:30	小学/三年级/三年级八班	3	0	10	1	1	1	1	2	3	0	1
2021/04/21 09:59:59	小学/三年级/三年级八班	3	0	9	1	2	1	1	2	4	0	0
2021/04/21 10:02:25	小学/三年级/三年级八班	3	1	10	0	2	1	2	2	4	0	0
2021/04/21 10:01:05	小学/三年级/三年级八班	3	1	9	0	2	2	2	2	1	0	0
2021/04/21 09:59:34	小学/三年级/三年级八班	3	0	9	1	2	1	2	2	1	1	1
2021/04/21 09:59:16	小学/三年级/三年级八班	3	0	9	1	1	2	1	1	2	0	0
2021/04/21 10:00:12	小学/三年级/三年级八班	3	1	9	0	2	2	2	3	0	0	0
2021/04/21 09:59:24	小学/三年级/三年级八班	3	0	10	1	2	2	1	3	0	0	0
2021/04/21 10:00:40	小学/三年级/三年级八班	3	0	10	0	2	2	1	3	0	0	0
2021/04/21 09:58:50	小学/三年级/三年级八班	3	0	9	0	2	1	1	3	0	1	1
2021/04/21 09:59:58	小学/三年级/三年级八班	3	0	10	0	2	1	1	2	4	1	0
2021/04/21 09:59:52	小学/三年级/三年级八班	3	0	9	0	2	2	2	3	0	0	0
2021/04/21 09:46:12	小学/三年级/三年级七班	3	0	9	0	1	1	0	1	1	1	0
2021/04/21 09:45:41	小学/三年级/三年级七班	3	1	9	1	2	1	2	2	1	0	0
2021/04/21 09:46:51	小学/三年级/三年级七班	3	1	9	0	1	1	2	2	4	1	0
2021/04/21 09:44:31	小学/三年级/三年级七班	3	0	9	0	1	1	2	2	1	1	0
2021/04/21 09:45:35	小学/三年级/三年级七班	3	1	10	0	2	2	2	3	0	0	0
2021/04/21 09:44:05	小学/三年级/三年级七班	3	1	9	0	1	2	1	2	1	0	0
2021/04/21 09:45:09	小学/三年级/三年级七班	3	0	9	0	2	2	0	1	3	0	1
2021/04/21 09:45:11	小学/三年级/三年级七班	3	1	9	0	2	2	2	2	1	0	0
2021/04/21 09:43:47	小学/三年级/三年级七班	3	1	10	0	2	2	2	2	1	1	0
2021/04/21 09:46:54	小学/三年级/三年级七班	3	1	9	0	1	2	2	2	1	0	0
2021/04/21 09:42:13	小学/三年级/三年级七班	3	0	9	0	2	2	1	2	1	0	0
2021/04/21 09:42:42	小学/三年级/三年级七班	3	1	9	1	1	1	1	2	2	0	0
2021/04/21 09:47:15	小学/三年级/三年级七班	3	1	10	0	2	2	2	2	1	0	0
2021/04/21 09:41:49	小学/三年级/三年级七班	3	0	9	0	1	0	1	1	3	1	1
2021/04/21 09:44:07	小学/三年级/三年级七班	3	0	9	1	2	1	2	1	3	0	1
2021/04/21 09:42:17	小学/三年级/三年级七班	3	0	9	0	2	2	1	3	0	0	0
2021/04/21 09:44:46	小学/三年级/三年级七班	3	1	10	0	2	2	2	3	0	0	1
2021/04/21 09:40:54	小学/三年级/三年级七班	3	0	9	0	2	2	0	2	1	1	1
2021/04/21 09:40:17	小学/三年级/三年级七班	3	0	10	0	2	1	2	1	3	0	0
2021/04/21 09:42:37	小学/三年级/三年级七班	3	0	10	0	1	1	2	3	0	0	0
2021/04/21 09:40:55	小学/三年级/三年级七班	3	1	9	0	1	2	1	3	0	0	0
2021/04/21 09:42:57	小学/三年级/三年级七班	3	0	9	0	2	2	2	2	1	0	0
2021/04/21 09:43:55	小学/三年级/三年级七班	3	1	10	0	2	2	2	3	0	0	0
2021/04/21 09:40:41	小学/三年级/三年级七班	3	0	10	0	2	1	1	3	0	0	1
2021/04/21 09:40:56	小学/三年级/三年级七班	3	0	9	0	2	2	0	0	4	1	0
2021/04/21 09:43:33	小学/三年级/三年级七班	3	1	10	1	1	2	2	2	4	1	1
2021/04/21 09:41:33	小学/三年级/三年级七班	3	0	9	0	1	1	0	0	1	0	1
2021/04/21 09:40:06	小学/三年级/三年级七班	3	0	10	0	2	1	2	3	0	1	0
2021/04/21 09:40:23	小学/三年级/三年级七班	3	1	9	0	2	2	2	3	0	1	1
2021/04/21 09:41:59	小学/三年级/三年级七班	3	1	9	1	2	1	2	1	1	0	0
2021/04/21 09:42:59	小学/三年级/三年级七班	3	1	9	0	1	1	1	1	3	1	1
2021/04/21 09:43:03	小学/三年级/三年级七班	3	0	10	0	2	2	2	3	0	0	1
2021/04/21 09:40:53	小学/三年级/三年级七班	3	1	9	0	2	2	1	2	1	0	0
2021/04/21 09:41:03	小学/三年级/三年级七班	3	1	9	0	2	2	1	3	0	0	1
2021/04/21 09:41:29	小学/三年级/三年级七班	3	1	9	1	2	2	2	2	1	0	0
2021/04/21 09:39:00	小学/三年级/三年级七班	3	0	9	0	1	0	0	2	1	1	1
2021/04/21 09:40:55	小学/三年级/三年级七班	3	1	10	0	1	1	0	3	0	0	1
2021/04/21 09:44:17	小学/三年级/三年级七班	3	0	9	0	2	2	2	2	1	0	0
2021/04/21 09:39:03	小学/三年级/三年级七班	3	0	10	0	2	1	2	3	0	0	0
2021/04/21 09:41:20	小学/三年级/三年级七班	3	1	9	0	2	1	1	2	1	1	0
2021/04/21 09:40:32	小学/三年级/三年级七班	3	1	9	0	2	1	1	3	0	0	0
2021/04/21 09:39:20	小学/三年级/三年级七班	3	1	10	0	2	2	1	3	0	1	0
2021/04/21 09:40:02	小学/三年级/三年级七班	3	0	10	1	2	1	1	2	1	0	0
2021/04/21 09:39:19	小学/三年级/三年级七班	3	0	9	0	1	1	0	0	1	1	1
2021/04/21 09:38:48	小学/三年级/三年级七班	3	0	9	0	2	1	1	2	3	0	0
2021/04/21 09:38:05	小学/三年级/三年级七班	3	0	9	1	2	2	2	3	0	0	0
2021/04/21 09:44:13	小学/三年级/三年级七班	3	0	9	0	1	1	1	3	0	1	1
2021/04/21 09:35:55	小学/三年级/三年级六班	3	1	10	1	1	1	2	2	4	0	0
2021/04/21 09:35:38	小学/三年级/三年级六班	3	0	9	0	1	2	1	3	0	1	0
2021/04/21 09:34:53	小学/三年级/三年级六班	3	1	10	0	2	2	0	2	4	0	0
2021/04/21 09:32:05	小学/三年级/三年级六班	3	0	9	0	2	1	1	2	4	0	0
2021/04/21 09:37:08	小学/三年级/三年级六班	3	1	10	0	2	2	2	3	0	0	1
2021/04/21 09:32:24	小学/三年级/三年级六班	3	0	9	0	2	2	1	3	0	0	0
2021/04/21 09:33:02	小学/三年级/三年级六班	3	0	10	0	1	1	2	2	4	0	0
2021/04/21 09:32:04	小学/三年级/三年级六班	3	0	9	0	2	2	2	1	1	1	1
2021/04/21 09:33:39	小学/三年级/三年级六班	3	1	9	0	1	1	1	2	1	0	1
2021/04/21 09:31:07	小学/三年级/三年级六班	3	1	9	0	1	2	2	3	0	0	0
2021/04/21 09:33:13	小学/三年级/三年级六班	3	1	9	0	2	1	2	2	4	0	1
2021/04/21 09:32:21	小学/三年级/三年级六班	3	1	10	0	2	1	1	3	0	0	0
2021/04/21 09:32:32	小学/三年级/三年级六班	3	1	9	0	1	2	1	3	0	0	0
2021/04/21 09:32:40	小学/三年级/三年级六班	3	1	9	0	1	2	1	2	3	0	0
2021/04/21 09:29:47	小学/三年级/三年级六班	3	0	9	1	2	0	1	2	1	0	1
2021/04/21 09:29:21	小学/三年级/三年级六班	3	0	10	0	1	1	1	3	0	0	0
2021/04/21 09:30:24	小学/三年级/三年级六班	3	0	10	1	1	1	1	0	4	0	1
2021/04/21 09:31:00	小学/三年级/三年级六班	3	1	10	0	2	1	2	2	1	0	0
2021/04/21 09:30:42	小学/三年级/三年级六班	3	1	9	0	2	1	2	2	4	0	0
2021/04/21 09:32:29	小学/三年级/三年级六班	3	1	10	0	1	1	1	2	1	0	0
2021/04/21 09:30:18	小学/三年级/三年级六班	3	0	9	1	1	2	2	3	0	0	1
2021/04/21 09:29:08	小学/三年级/三年级六班	3	0	10	0	1	0	1	2	1	0	1
2021/04/21 09:30:57	小学/三年级/三年级六班	3	1	9	0	1	1	1	2	1	0	0
2021/04/21 09:29:59	小学/三年级/三年级六班	3	1	10	0	2	2	1	2	1	0	1
2021/04/21 09:30:29	小学/三年级/三年级六班	3	0	10	0	1	1	1	2	4	0	0
2021/04/21 09:29:05	小学/三年级/三年级六班	3	0	9	0	1	1	1	2	4	0	0
2021/04/21 09:31:27	小学/三年级/三年级六班	3	1	9	0	1	1	2	2	1	1	0
2021/04/21 09:28:16	小学/三年级/三年级六班	3	0	9	1	2	2	1	2	2	0	0
2021/04/21 09:28:17	小学/三年级/三年级六班	3	0	10	1	1	1	1	2	1	0	0
2021/04/21 09:29:10	小学/三年级/三年级六班	3	0	9	0	0	1	1	2	2	0	0
2021/04/21 09:29:00	小学/三年级/三年级六班	3	1	9	0	2	2	2	2	4	0	0
2021/04/21 09:29:18	小学/三年级/三年级六班	3	1	10	1	2	1	1	2	2	0	1
2021/04/21 09:27:50	小学/三年级/三年级六班	3	1	10	0	2	2	1	2	1	0	0
2021/04/21 09:29:41	小学/三年级/三年级六班	3	1	9	0	2	2	2	0	1	1	0
2021/04/21 09:29:51	小学/三年级/三年级六班	3	1	9	1	2	2	2	2	1	0	0
2021/04/21 09:27:32	小学/三年级/三年级六班	3	0	9	0	2	2	2	2	4	0	0
2021/04/21 09:27:24	小学/三年级/三年级六班	3	0	10	1	1	2	1	2	1	0	0
2021/04/21 09:28:05	小学/三年级/三年级六班	3	1	9	0	1	2	1	2	2	0	0
2021/04/21 09:27:13	小学/三年级/三年级六班	3	0	9	0	1	0	1	2	1	0	1
2021/04/21 09:27:54	小学/三年级/三年级六班	3	1	9	1	2	1	2	3	0	0	0
2021/04/21 09:28:34	小学/三年级/三年级六班	3	1	9	0	2	2	2	3	0	0	0
2021/04/21 09:26:14	小学/三年级/三年级六班	3	0	10	0	0	2	0	3	0	1	1
2021/04/21 09:26:03	小学/三年级/三年级六班	3	0	10	1	1	2	1	2	4	0	0
2021/04/21 09:25:59	小学/三年级/三年级六班	3	0	9	0	2	2	2	2	1	1	0
2021/04/21 09:26:52	小学/三年级/三年级六班	3	0	10	1	1	1	2	2	2	1	0
2021/04/21 09:20:52	小学/三年级/三年级五班	3	1	9	0	2	2	2	3	0	0	0
2021/04/21 09:20:15	小学/三年级/三年级五班	3	0	10	0	1	2	2	0	1	0	0
2021/04/21 09:20:26	小学/三年级/三年级五班	3	0	9	0	2	2	2	2	2	0	0
2021/04/21 09:20:18	小学/三年级/三年级五班	3	0	10	0	2	2	2	0	3	1	0
2021/04/21 09:20:59	小学/三年级/三年级五班	3	0	9	1	1	1	1	3	0	0	0
2021/04/21 09:19:50	小学/三年级/三年级五班	3	1	9	0	1	2	1	2	4	0	1
2021/04/21 09:20:42	小学/三年级/三年级五班	3	1	9	0	2	1	2	2	1	0	0
2021/04/21 09:20:49	小学/三年级/三年级五班	3	1	9	1	1	1	2	1	2	0	1
2021/04/21 09:19:39	小学/三年级/三年级五班	3	1	10	0	2	1	2	2	3	1	1
2021/04/21 09:20:09	小学/三年级/三年级五班	3	0	9	0	2	2	2	3	0	0	0
2021/04/21 09:19:28	小学/三年级/三年级五班	3	0	10	0	1	1	1	2	3	1	0
2021/04/21 09:20:26	小学/三年级/三年级五班	3	1	10	0	1	0	1	2	1	0	1
2021/04/21 09:18:47	小学/三年级/三年级五班	3	0	9	0	2	2	2	3	0	0	0
2021/04/21 09:19:28	小学/三年级/三年级五班	3	1	9	0	1	2	2	3	0	0	0
2021/04/21 09:19:12	小学/三年级/三年级五班	3	0	10	1	2	1	2	2	4	1	0
2021/04/21 09:18:44	小学/三年级/三年级五班	3	1	10	0	2	1	1	3	0	0	0
2021/04/21 09:18:27	小学/三年级/三年级五班	3	0	10	0	2	2	2	2	4	0	0
2021/04/21 09:18:53	小学/三年级/三年级五班	3	0	10	0	1	1	0	3	0	0	0
2021/04/21 09:18:34	小学/三年级/三年级五班	3	1	9	1	2	2	2	2	1	0	0
2021/04/21 09:19:03	小学/三年级/三年级五班	3	0	10	0	1	1	2	2	3	1	1
2021/04/21 09:18:56	小学/三年级/三年级五班	3	1	10	0	2	2	2	2	4	0	0
2021/04/21 09:20:49	小学/三年级/三年级五班	3	1	9	1	1	2	1	1	1	1	1
2021/04/21 09:19:10	小学/三年级/三年级五班	3	1	10	0	2	2	1	2	1	0	1
2021/04/21 09:17:26	小学/三年级/三年级五班	3	0	10	0	2	2	2	2	3	0	0
2021/04/21 09:18:16	小学/三年级/三年级五班	3	1	9	0	1	2	1	2	1	0	1
2021/04/21 09:19:38	小学/三年级/三年级五班	3	0	10	1	1	2	1	2	1	0	0
2021/04/21 09:18:34	小学/三年级/三年级五班	3	0	9	1	2	1	1	3	0	0	0
2021/04/21 09:19:37	小学/三年级/三年级五班	3	0	10	1	1	1	1	2	2	0	1
2021/04/21 09:18:38	小学/三年级/三年级五班	3	1	10	0	2	2	2	3	0	0	0
2021/04/21 09:17:35	小学/三年级/三年级五班	3	1	9	0	2	2	1	3	0	0	0
2021/04/21 09:18:27	小学/三年级/三年级五班	3	1	10	0	2	1	1	2	1	0	0
2021/04/21 09:17:33	小学/三年级/三年级五班	3	1	10	0	2	1	1	3	0	0	0
2021/04/21 09:17:45	小学/三年级/三年级五班	3	1	10	1	2	1	2	3	0	0	0
2021/04/21 09:17:07	小学/三年级/三年级五班	3	0	9	0	2	1	2	3	0	0	0
2021/04/21 09:16:57	小学/三年级/三年级五班	3	0	9	0	2	2	2	3	0	0	0
2021/04/21 09:16:54	小学/三年级/三年级五班	3	0	9	0	2	2	2	3	0	0	0
2021/04/21 09:17:34	小学/三年级/三年级五班	3	0	9	0	1	1	1	2	1	0	0
2021/04/21 09:17:16	小学/三年级/三年级五班	3	0	10	0	2	2	1	3	0	0	0
2021/04/21 09:17:38	小学/三年级/三年级五班	3	1	9	0	1	2	1	3	0	0	0
2021/04/21 09:16:21	小学/三年级/三年级五班	3	0	10	0	2	2	2	3	0	0	0
2021/04/21 09:16:23	小学/三年级/三年级五班	3	0	10	0	2	1	2	3	0	0	0
2021/04/21 09:18:46	小学/三年级/三年级五班	3	1	10	1	2	1	1	2	4	0	0
2021/04/21 09:15:27	小学/三年级/三年级四班	3	1	9	0	2	2	2	3	0	0	1
2021/04/21 09:15:30	小学/三年级/三年级四班	3	1	10	0	2	2	2	2	1	1	1
2021/04/21 09:12:24	小学/三年级/三年级四班	3	0	10	0	1	1	1	1	2	0	1
2021/04/21 09:13:27	小学/三年级/三年级四班	3	1	9	1	1	2	1	1	4	0	0
2021/04/21 09:13:00	小学/三年级/三年级四班	3	1	10	0	2	1	2	2	4	0	0
2021/04/21 09:11:42	小学/三年级/三年级四班	3	0	9	0	1	1	1	3	0	0	0
2021/04/21 09:11:16	小学/三年级/三年级四班	3	1	9	0	1	1	2	2	1	0	0
2021/04/21 09:10:43	小学/三年级/三年级四班	3	0	10	0	2	2	2	2	1	0	0
2021/04/21 09:11:22	小学/三年级/三年级四班	3	0	9	0	1	1	1	0	3	0	0
2021/04/21 09:10:28	小学/三年级/三年级四班	3	0	10	0	2	2	1	3	0	0	0
2021/04/21 09:11:11	小学/三年级/三年级四班	3	1	10	0	2	2	2	2	1	0	0
2021/04/21 09:10:28	小学/三年级/三年级四班	3	1	10	0	2	2	1	2	1	0	0
2021/04/21 09:09:39	小学/三年级/三年级四班	3	1	9	0	2	2	2	3	0	0	0
2021/04/21 09:09:06	小学/三年级/三年级四班	3	0	9	0	2	2	2	3	0	0	0
2021/04/21 09:09:37	小学/三年级/三年级四班	3	1	10	0	2	1	2	3	0	0	0
2021/04/21 09:09:12	小学/三年级/三年级四班	3	1	9	0	2	1	1	3	0	0	1
2021/04/21 09:14:04	小学/三年级/三年级四班	3	0	9	1	0	1	2	2	2	0	1
2021/04/21 09:15:26	小学/三年级/三年级四班	3	1	10	0	1	2	2	3	0	0	0
2021/04/21 09:08:21	小学/三年级/三年级四班	3	0	10	0	2	1	1	3	0	1	1
2021/04/21 09:10:40	小学/三年级/三年级四班	3	1	10	1	2	1	2	0	1	1	1
2021/04/21 09:11:41	小学/三年级/三年级四班	3	1	9	0	2	2	2	0	3	1	0
2021/04/21 09:09:12	小学/三年级/三年级四班	3	1	10	1	1	1	2	0	1	0	0
2021/04/21 09:08:00	小学/三年级/三年级四班	3	0	10	0	1	1	2	3	0	0	0
2021/04/21 09:07:39	小学/三年级/三年级四班	3	1	9	0	2	2	2	0	1	0	0
2021/04/21 09:09:42	小学/三年级/三年级四班	3	0	9	1	1	1	2	0	1	0	0
2021/04/21 09:08:31	小学/三年级/三年级四班	3	1	10	0	1	1	1	2	1	0	1
2021/04/21 09:08:57	小学/三年级/三年级四班	3	0	10	0	2	2	2	3	0	0	0
2021/04/21 09:09:07	小学/三年级/三年级四班	3	0	10	0	2	2	2	2	4	0	0
2021/04/21 09:08:44	小学/三年级/三年级四班	3	1	10	0	2	2	2	3	0	0	0
2021/04/21 09:07:00	小学/三年级/三年级四班	3	0	10	0	2	2	0	2	1	0	0
2021/04/21 09:07:57	小学/三年级/三年级四班	3	0	9	0	1	1	1	2	1	0	0
2021/04/21 09:08:59	小学/三年级/三年级四班	3	1	9	0	1	2	2	2	2	0	1
2021/04/21 09:08:53	小学/三年级/三年级四班	3	1	9	1	2	0	1	0	4	0	1
2021/04/21 09:06:04	小学/三年级/三年级四班	3	0	10	0	2	2	1	2	1	0	0
2021/04/21 09:08:23	小学/三年级/三年级四班	3	1	9	0	1	1	2	2	2	0	1
2021/04/21 09:07:42	小学/三年级/三年级四班	3	0	10	0	2	1	2	2	4	0	0
2021/04/21 09:06:52	小学/三年级/三年级四班	3	1	9	0	2	1	1	3	0	0	0
2021/04/21 09:05:08	小学/三年级/三年级四班	3	0	9	0	2	1	1	1	4	0	0
2021/04/21 09:04:58	小学/三年级/三年级四班	3	0	9	0	2	2	1	3	0	0	0
2021/04/21 09:08:47	小学/三年级/三年级四班	3	0	9	1	1	2	1	2	4	0	1
2021/04/21 09:14:26	小学/三年级/三年级四班	3	0	10	0	1	2	2	3	0	0	0
2021/04/21 09:04:28	小学/三年级/三年级三班	3	0	9	1	1	2	2	3	0	0	0
2021/04/21 09:04:29	小学/三年级/三年级三班	3	0	9	1	2	2	1	3	0	0	1
2021/04/21 09:14:49	小学/三年级/三年级四班	3	1	10	1	1	0	2	3	0	0	1
2021/04/21 09:00:51	小学/三年级/三年级三班	3	1	9	1	2	1	1	3	0	0	0
2021/04/21 09:00:54	小学/三年级/三年级三班	3	1	10	0	1	1	2	3	0	0	0
2021/04/21 09:00:05	小学/三年级/三年级三班	3	1	9	0	1	2	1	3	0	0	0
2021/04/21 08:59:08	小学/三年级/三年级三班	3	0	9	0	2	2	2	3	0	0	0
2021/04/21 08:58:43	小学/三年级/三年级三班	3	0	10	0	2	2	2	3	0	1	0
2021/04/21 08:58:59	小学/三年级/三年级三班	3	0	10	0	2	1	2	3	0	0	0
2021/04/21 08:59:32	小学/三年级/三年级三班	3	1	10	0	1	1	2	3	0	0	0
2021/04/21 09:01:16	小学/三年级/三年级三班	3	1	9	0	1	1	1	3	0	0	0
2021/04/21 09:00:43	小学/三年级/三年级三班	3	1	9	0	2	1	1	2	1	0	0
2021/04/21 08:59:00	小学/三年级/三年级三班	3	1	9	0	2	2	2	3	0	0	0
2021/04/21 08:58:53	小学/三年级/三年级三班	3	0	10	0	2	1	2	3	0	0	0
2021/04/21 09:00:08	小学/三年级/三年级三班	3	0	9	0	2	2	1	3	0	0	0
2021/04/21 09:00:54	小学/三年级/三年级三班	3	1	10	1	2	2	2	3	0	0	0
2021/04/21 08:59:44	小学/三年级/三年级三班	3	0	10	0	2	2	2	3	0	0	0
2021/04/21 08:59:23	小学/三年级/三年级三班	3	1	9	0	2	2	2	3	0	0	0
2021/04/21 08:59:00	小学/三年级/三年级三班	3	0	9	0	1	2	1	3	0	0	0
2021/04/21 08:58:01	小学/三年级/三年级三班	3	0	9	0	2	1	2	3	0	0	0
2021/04/21 09:00:09	小学/三年级/三年级三班	3	1	9	0	2	2	2	3	0	0	0
2021/04/21 08:59:17	小学/三年级/三年级三班	3	0	10	0	2	1	1	2	4	0	0
2021/04/21 08:59:03	小学/三年级/三年级三班	3	1	9	0	2	2	2	3	0	0	0
2021/04/21 08:57:39	小学/三年级/三年级三班	3	0	9	0	2	1	1	3	0	0	0
2021/04/21 08:58:06	小学/三年级/三年级三班	3	0	9	0	1	1	2	2	1	0	0
2021/04/21 08:57:24	小学/三年级/三年级三班	3	0	9	0	2	2	1	3	0	0	0
2021/04/21 08:59:13	小学/三年级/三年级三班	3	1	9	0	1	1	2	3	0	0	0
2021/04/21 08:57:57	小学/三年级/三年级三班	3	1	9	0	2	1	2	1	2	0	0
2021/04/21 08:58:20	小学/三年级/三年级三班	3	1	9	0	1	2	2	3	0	0	0
2021/04/21 08:57:04	小学/三年级/三年级三班	3	0	10	1	1	1	1	2	1	0	0
2021/04/21 08:57:57	小学/三年级/三年级三班	3	1	9	0	1	1	1	2	1	1	1
2021/04/21 08:58:35	小学/三年级/三年级三班	3	1	9	0	2	2	2	3	0	0	0
2021/04/21 08:57:42	小学/三年级/三年级三班	3	1	9	0	2	2	1	3	0	0	0
2021/04/21 08:58:51	小学/三年级/三年级三班	3	1	9	1	0	1	2	3	0	0	0
2021/04/21 08:57:34	小学/三年级/三年级三班	3	1	9	0	2	2	2	3	0	1	0
2021/04/21 08:58:43	小学/三年级/三年级三班	3	1	10	0	2	1	1	3	0	0	0
2021/04/21 08:57:07	小学/三年级/三年级三班	3	0	9	0	2	2	2	3	0	0	0
2021/04/21 08:58:22	小学/三年级/三年级三班	3	0	9	0	2	2	2	3	0	0	0
2021/04/21 08:57:28	小学/三年级/三年级三班	3	0	10	0	1	1	2	3	0	0	0
2021/04/21 08:58:38	小学/三年级/三年级三班	3	1	9	0	2	2	2	3	0	0	0
2021/04/21 08:57:30	小学/三年级/三年级三班	3	0	10	1	2	1	1	3	0	0	0
2021/04/21 08:56:34	小学/三年级/三年级三班	3	0	9	0	2	2	2	3	0	0	0
2021/04/21 08:58:15	小学/三年级/三年级三班	3	0	10	0	2	1	1	2	4	0	0
2021/04/21 08:57:09	小学/三年级/三年级三班	3	0	9	0	2	2	2	3	0	0	0
2021/04/21 08:57:22	小学/三年级/三年级三班	3	0	9	0	2	0	2	2	1	0	1
2021/04/21 08:59:05	小学/三年级/三年级三班	3	1	9	0	2	2	2	2	4	0	0
2021/04/21 08:59:33	小学/三年级/三年级三班	3	0	9	1	1	2	2	3	0	0	0
2021/04/21 08:56:57	小学/三年级/三年级三班	3	0	10	0	2	2	2	3	0	0	0
2021/04/21 08:58:00	小学/三年级/三年级三班	3	1	9	0	2	1	1	3	0	0	0
2021/04/21 08:55:39	小学/三年级/三年级二班	3	1	9	0	1	2	2	3	0	0	1
2021/04/21 08:53:51	小学/三年级/三年级二班	3	1	9	0	2	2	2	2	2	1	1
2021/04/21 08:48:05	小学/三年级/三年级二班	3	1	9	0	2	1	2	2	1	0	0
2021/04/21 08:52:39	小学/三年级/三年级二班	3	1	9	0	1	2	1	2	2	0	0
2021/04/21 08:51:20	小学/三年级/三年级二班	3	1	10	1	2	1	2	2	1	0	0
2021/04/21 08:45:58	小学/三年级/三年级一班	3	1	9	1	1	1	1	3	0	0	0
2021/04/21 08:49:59	小学/三年级/三年级二班	3	1	10	0	2	2	2	3	0	0	0
2021/04/21 08:43:28	小学/三年级/三年级二班	3	0	10	0	0	1	1	0	1	0	0
2021/04/21 08:51:43	小学/三年级/三年级二班	3	1	10	0	2	1	2	2	1	0	0
2021/04/21 08:51:29	小学/三年级/三年级二班	3	1	9	0	2	1	2	1	1	0	1
2021/04/21 08:42:13	小学/三年级/三年级二班	3	0	10	0	2	1	1	2	1	0	1
2021/04/21 08:42:44	小学/三年级/三年级二班	3	1	10	1	2	2	2	3	0	1	1
2021/04/21 08:49:47	小学/三年级/三年级二班	3	0	10	1	1	1	1	2	4	0	0
2021/04/21 08:40:50	小学/三年级/三年级一班	3	0	9	0	2	2	1	3	0	0	0
2021/04/21 08:46:04	小学/三年级/三年级二班	3	0	9	0	1	1	1	3	0	0	0
2021/04/21 08:39:46	小学/三年级/三年级一班	3	1	9	0	2	1	1	3	0	0	0
2021/04/21 08:43:08	小学/三年级/三年级二班	3	0	10	1	2	1	2	2	1	0	0
2021/04/21 08:39:32	小学/三年级/三年级一班	3	0	10	0	1	1	1	2	4	1	1
2021/04/21 08:47:00	小学/三年级/三年级二班	3	1	9	0	1	2	1	2	1	0	1
2021/04/21 08:49:10	小学/三年级/三年级二班	3	1	10	0	2	1	1	2	4	0	0
2021/04/21 08:46:22	小学/三年级/三年级二班	3	1	9	0	1	2	2	3	0	0	0
2021/04/21 08:38:27	小学/三年级/三年级一班	3	0	9	0	1	1	2	3	0	0	0
2021/04/21 08:37:53	小学/三年级/三年级一班	3	0	9	0	2	2	1	3	0	0	0
2021/04/21 08:46:58	小学/三年级/三年级二班	3	0	10	0	2	1	2	0	1	0	0
2021/04/21 08:44:08	小学/三年级/三年级二班	3	1	9	0	2	1	1	3	0	0	0
2021/04/21 08:49:45	小学/三年级/三年级二班	3	1	9	0	2	2	2	2	2	0	0
2021/04/21 08:39:29	小学/三年级/三年级一班	3	1	9	0	1	1	2	2	4	0	1
2021/04/21 08:39:34	小学/三年级/三年级一班	3	1	9	1	2	1	2	3	0	0	0
2021/04/21 08:51:21	小学/三年级/三年级二班	3	0	9	0	2	1	2	3	0	1	0
2021/04/21 08:37:09	小学/三年级/三年级一班	3	0	10	0	2	1	1	3	0	0	0
2021/04/21 08:39:29	小学/三年级/三年级二班	3	0	9	0	2	2	2	2	1	0	0
2021/04/21 08:37:11	小学/三年级/三年级一班	3	1	10	0	1	2	1	3	0	0	0
2021/04/21 08:38:32	小学/三年级/三年级一班	3	1	9	1	1	1	1	2	2	1	1
2021/04/21 08:38:32	小学/三年级/三年级二班	3	0	9	1	2	2	2	2	1	0	0
2021/04/21 08:52:21	小学/三年级/三年级二班	3	0	9	0	2	2	1	2	4	0	0
2021/04/21 08:38:36	小学/三年级/三年级一班	3	1	9	1	1	1	2	1	2	1	1
2021/04/21 08:40:24	小学/三年级/三年级一班	3	0	10	1	2	2	2	3	0	0	0
2021/04/21 08:53:38	小学/三年级/三年级二班	3	1	9	0	1	1	2	2	1	1	1
2021/04/21 08:48:29	小学/三年级/三年级二班	3	0	10	0	2	2	0	0	1	0	0
2021/04/21 08:51:39	小学/三年级/三年级二班	3	1	9	1	2	1	2	2	1	0	0
2021/04/21 08:48:53	小学/三年级/三年级二班	3	1	10	1	2	1	1	3	0	0	0
2021/04/21 08:53:44	小学/三年级/三年级二班	3	1	9	0	1	1	0	2	2	1	1
2021/04/21 08:38:36	小学/三年级/三年级一班	3	1	9	0	1	1	1	2	4	0	0
2021/04/21 08:54:53	小学/三年级/三年级二班	3	0	10	1	1	1	2	1	1	0	1
2021/04/21 08:53:29	小学/三年级/三年级二班	3	1	10	0	1	2	2	3	0	0	1
2021/04/21 08:37:40	小学/三年级/三年级一班	3	1	9	0	2	1	2	3	0	0	0
2021/04/21 08:37:56	小学/三年级/三年级一班	3	0	9	0	1	2	1	3	0	1	0
2021/04/21 08:54:01	小学/三年级/三年级二班	3	0	9	0	2	1	1	2	1	0	0
2021/04/21 08:39:36	小学/三年级/三年级二班	3	0	10	0	1	1	1	2	4	0	0
2021/04/21 08:38:38	小学/三年级/三年级一班	3	1	9	0	1	1	1	2	4	0	0
2021/04/21 08:37:26	小学/三年级/三年级一班	3	0	10	1	2	1	1	1	1	1	1
2021/04/21 08:52:37	小学/三年级/三年级二班	3	0	9	0	2	1	1	2	3	0	0
2021/04/21 08:45:46	小学/三年级/三年级二班	3	0	10	0	1	2	1	2	1	0	0
2021/04/21 08:39:28	小学/三年级/三年级一班	3	1	9	0	2	1	1	2	1	0	0
2021/04/21 08:37:33	小学/三年级/三年级一班	3	1	9	1	2	1	1	2	4	1	1
2021/04/21 08:52:30	小学/三年级/三年级二班	3	0	10	1	2	0	1	2	1	1	1
2021/04/21 08:36:38	小学/三年级/三年级一班	3	1	10	1	1	1	1	3	0	0	1
2021/04/21 08:35:46	小学/三年级/三年级一班	3	0	10	0	2	2	2	2	2	0	0
2021/04/21 08:36:11	小学/三年级/三年级一班	3	0	9	0	2	0	1	2	4	0	0
2021/04/21 08:41:16	小学/三年级/三年级一班	3	1	9	1	2	2	1	3	0	0	0
2021/04/21 08:38:54	小学/三年级/三年级一班	3	1	9	0	2	1	1	3	0	0	0
2021/04/21 08:49:00	小学/三年级/三年级二班	3	1	9	1	2	2	1	3	0	0	0
2021/04/21 08:46:35	小学/三年级/三年级二班	3	1	10	0	2	1	1	3	0	0	0
2021/04/21 08:37:49	小学/三年级/三年级一班	3	1	10	0	2	2	2	3	0	0	0
2021/04/21 08:36:52	小学/三年级/三年级一班	3	1	9	0	1	1	1	3	0	0	0
2021/04/21 08:37:52	小学/三年级/三年级一班	3	1	10	0	1	2	2	3	0	0	0
2021/04/21 08:35:48	小学/三年级/三年级一班	3	0	9	0	2	1	1	1	1	0	0
2021/04/21 08:40:19	小学/三年级/三年级二班	3	0	10	0	2	2	2	3	0	0	0
2021/04/21 08:34:39	小学/三年级/三年级一班	3	0	9	0	1	2	2	3	0	0	0
2021/04/21 08:36:07	小学/三年级/三年级一班	3	1	9	1	2	0	2	2	1	1	1
2021/04/21 08:42:48	小学/三年级/三年级二班	3	1	10	1	2	2	2	3	0	0	0
2021/04/21 08:46:44	小学/三年级/三年级二班	3	1	10	0	2	0	1	2	1	0	1
2021/04/21 08:51:18	小学/三年级/三年级二班	3	1	9	1	1	1	1	1	1	0	1
2021/04/21 08:35:12	小学/三年级/三年级一班	3	0	10	0	2	2	2	3	0	0	0
2021/04/21 08:39:54	小学/三年级/三年级二班	3	0	10	0	1	0	1	1	1	0	1
2021/04/21 08:52:34	小学/三年级/三年级二班	3	0	10	0	2	1	1	2	3	0	0
2021/04/21 08:35:14	小学/三年级/三年级一班	3	0	10	0	1	1	1	1	1	0	1
2021/04/21 08:35:42	小学/三年级/三年级二班	3	0	10	0	2	1	1	2	4	0	0
2021/04/21 08:34:16	小学/三年级/三年级一班	3	0	9	0	2	0	2	1	2	0	1
2021/04/21 08:34:24	小学/三年级/三年级一班	3	0	9	0	2	2	1	3	0	0	0
2021/04/21 08:34:35	小学/三年级/三年级一班	3	0	9	0	2	1	1	2	3	0	0
2021/04/21 08:35:38	小学/三年级/三年级一班	3	1	9	0	2	1	1	2	1	0	0
2021/04/21 08:34:52	小学/三年级/三年级一班	3	1	9	0	2	1	1	2	1	1	1
2021/04/21 08:36:39	小学/三年级/三年级一班	3	0	9	0	2	0	1	2	1	0	0
2021/04/21 08:44:20	小学/三年级/三年级二班	3	0	10	1	2	1	2	3	0	0	0
2021/04/21 08:34:46	小学/三年级/三年级一班	3	0	10	1	2	2	2	2	1	0	0
2021/04/21 08:34:27	小学/三年级/三年级一班	3	0	9	0	2	2	1	3	0	0	0
2021/04/21 08:34:03	小学/三年级/三年级一班	3	0	9	1	2	1	2	2	4	0	0
2021/04/21 08:34:54	小学/三年级/三年级一班	3	1	9	0	2	1	1	3	0	0	0
2021/04/21 08:33:44	小学/三年级/三年级一班	3	0	10	0	1	2	1	0	1	1	0
2021/04/21 08:33:47	小学/三年级/三年级一班	3	0	9	1	2	1	2	2	4	0	0
2021/04/21 08:34:15	小学/三年级/三年级一班	3	0	9	0	1	2	1	2	1	1	0
2021/04/21 08:36:10	小学/三年级/三年级一班	3	0	10	0	1	2	2	3	0	0	0
2021/06/05 22:43:42	小学/三年级	3	1	10	1	2	2	2	1	1	0	0
2021/06/05 16:13:03	小学/三年级	3	1	10	0	2	2	0	3	0	0	0
2021/06/04 22:15:58	小学/三年级	3	0	9	1	2	2	1	3	0	1	0
2021/06/04 22:11:36	小学/三年级	3	0	9	0	1	1	2	1	3	0	1
2021/06/04 21:28:58	小学/三年级	3	0	10	0	2	2	0	2	1	1	0
2021/06/04 20:54:19	小学/三年级	3	0	10	0	2	1	1	2	2	0	0
2021/06/04 20:00:09	小学/三年级	3	1	10	1	2	2	0	3	0	0	0
2021/06/04 19:12:26	小学/三年级	3	1	9	1	2	0	1	2	2	0	0
2021/06/04 19:11:43	小学/三年级	3	0	9	1	2	1	0	3	0	0	0
2021/06/04 18:48:37	小学/三年级	3	0	9	1	2	2	2	3	0	0	0
2021/06/04 18:47:03	小学/三年级	3	0	9	0	2	2	1	3	0	0	0
2021/06/04 18:30:23	小学/三年级	3	0	10	0	2	1	1	3	0	0	0
2021/06/04 18:29:55	小学/三年级	3	1	9	0	2	1	2	3	0	0	0
2021/06/04 18:00:24	小学/三年级	3	0	9	1	2	0	2	3	0	0	1
2021/06/04 18:00:30	小学/三年级	3	1	9	1	2	2	1	3	0	0	0
2021/06/04 17:59:03	小学/三年级	3	0	9	1	2	1	1	2	1	0	0
2021/06/04 17:12:39	小学/三年级	3	1	9	0	1	1	1	2	2	1	0
2021/06/04 17:12:29	小学/三年级	3	0	10	0	1	1	2	3	0	0	0
2021/06/04 17:11:02	小学/三年级	3	0	10	0	1	1	1	3	0	1	0
2021/06/04 17:11:35	小学/三年级	3	0	9	1	1	1	1	2	1	0	0
2021/06/04 17:10:27	小学/三年级	3	0	9	1	2	2	2	2	1	0	0
2021/06/04 17:10:19	小学/三年级	3	1	9	0	2	2	2	1	3	1	1
2021/06/04 17:10:23	小学/三年级	3	0	9	0	1	1	1	2	1	0	0
2021/06/04 17:09:38	小学/三年级	3	0	10	0	2	2	1	2	2	0	0
2021/06/04 17:09:09	小学/三年级	3	1	9	1	2	2	2	3	0	0	0
2021/06/04 17:09:31	小学/三年级	3	0	10	1	2	1	2	2	1	0	0
2021/06/04 17:08:32	小学/三年级	3	0	10	1	2	2	2	2	1	0	0
2021/06/04 17:08:04	小学/三年级	3	0	9	0	1	1	1	3	0	1	0
2021/06/04 17:06:45	小学/三年级	3	1	9	1	2	2	1	3	0	0	0
2021/06/04 17:06:50	小学/三年级	3	0	9	1	1	2	1	2	1	0	0
2021/06/04 17:06:29	小学/三年级	3	0	10	1	2	1	1	2	2	0	0
2021/06/04 17:05:51	小学/三年级	3	0	9	0	2	2	1	3	0	0	0
2021/06/04 17:05:31	小学/三年级	3	1	9	1	2	1	2	3	0	0	0
2021/06/04 17:04:56	小学/三年级	3	0	9	0	2	2	2	2	4	0	0
2021/06/04 17:04:44	小学/三年级	3	0	9	1	2	1	2	2	1	1	0
2021/06/04 17:04:00	小学/三年级	3	1	9	1	2	2	2	3	0	0	0
2021/06/04 17:03:44	小学/三年级	3	0	9	1	2	2	2	2	1	0	0
2021/06/04 17:03:16	小学/三年级	3	0	10	0	2	2	1	2	3	1	0
2021/06/04 17:02:05	小学/三年级	3	0	10	1	1	1	0	2	1	0	0
2021/06/04 17:02:01	小学/三年级	3	0	10	1	2	1	2	3	0	0	0
2021/06/04 17:00:46	小学/三年级	3	1	9	1	2	1	2	3	0	0	0
2021/06/04 17:01:30	小学/三年级	3	1	9	0	1	1	2	0	1	0	0
2021/06/04 17:00:14	小学/三年级	3	1	10	0	2	2	2	3	0	0	0
2021/06/04 17:01:03	小学/三年级	3	1	9	0	2	2	1	2	1	0	0
2021/06/04 17:00:24	小学/三年级	3	1	9	1	2	2	2	3	0	0	0
2021/06/04 17:00:39	小学/三年级	3	1	10	1	1	2	1	2	1	0	0
2021/06/04 17:01:40	小学/三年级	3	1	10	0	2	2	2	3	0	0	0
2021/06/04 17:00:18	小学/三年级	3	1	9	0	1	1	2	3	0	1	0
2021/06/04 16:59:05	小学/三年级	3	1	9	1	2	2	2	3	0	0	0
2021/06/04 16:58:46	小学/三年级	3	0	10	1	2	1	1	3	0	0	0
2021/06/04 16:58:30	小学/三年级	3	1	10	1	2	2	2	2	1	0	0
2021/06/04 16:57:44	小学/三年级	3	1	9	1	2	2	2	3	0	0	0
2021/06/04 16:57:25	小学/三年级	3	1	10	1	1	2	1	0	1	0	0
2021/06/04 16:55:52	小学/三年级	3	1	10	0	2	2	1	3	0	0	0
2021/06/04 16:55:23	小学/三年级	3	1	10	1	2	1	2	3	0	0	0
2021/06/04 16:56:27	小学/三年级	3	1	9	0	1	0	0	2	1	1	1
2021/06/04 16:54:41	小学/三年级	3	1	9	0	2	1	2	3	0	0	0
2021/06/04 16:54:43	小学/三年级	3	1	10	0	1	1	1	2	1	0	0
2021/06/04 16:52:56	小学/三年级	3	0	9	0	2	2	2	3	0	0	0
2021/06/04 16:52:22	小学/三年级	3	0	9	1	1	0	1	3	0	0	0
2021/06/04 16:45:21	小学/三年级	3	1	9	0	1	2	2	2	4	0	1
2021/06/04 16:43:45	小学/三年级	3	0	10	0	2	2	1	3	0	0	0
2021/06/04 16:43:39	小学/三年级	3	1	10	1	2	2	1	3	0	0	0
2021/06/04 16:43:36	小学/三年级	3	0	10	0	2	2	1	3	0	0	0
2021/06/04 16:43:23	小学/三年级	3	0	10	0	1	1	1	0	3	0	0
2021/06/04 16:43:50	小学/三年级	3	0	9	1	1	1	1	2	1	0	1
2021/06/04 16:46:15	小学/三年级	3	1	10	1	1	1	1	2	2	0	0
2021/06/04 16:42:45	小学/三年级	3	1	9	0	2	2	2	3	0	0	0
2021/06/04 16:42:53	小学/三年级	3	0	9	1	1	1	2	2	4	0	0
2021/06/04 16:37:51	小学/三年级	3	1	9	1	1	1	1	2	2	1	1
2021/06/04 16:36:36	小学/三年级	3	0	9	0	2	1	1	3	0	0	0
2021/06/04 16:34:28	小学/三年级	3	0	9	0	2	1	1	2	3	0	0
2021/06/04 16:29:30	小学/三年级	3	0	10	1	1	1	1	3	0	0	1
2021/06/04 16:27:47	小学/三年级	3	1	9	0	1	1	1	2	3	0	0
2021/06/04 16:26:04	小学/三年级	3	1	10	1	1	2	1	2	3	1	0
2021/06/04 16:25:00	小学/三年级	3	1	10	0	2	2	2	3	0	0	0
2021/06/04 16:23:37	小学/三年级	3	0	9	1	2	2	2	3	0	0	0
2021/06/04 16:20:23	小学/三年级	3	0	9	1	2	2	2	3	0	0	0
2021/06/04 15:55:21	小学/三年级	3	0	10	1	2	2	1	3	0	0	0
2021/06/04 15:42:54	小学/三年级	3	1	10	1	2	0	0	3	0	0	0
2021/06/04 15:12:55	小学/三年级	3	0	10	1	1	2	1	3	0	0	0
2021/06/04 15:10:13	小学/三年级	3	1	9	1	1	1	1	2	3	0	0
2021/06/04 15:08:45	小学/三年级	3	1	9	1	2	1	1	3	0	0	0
2021/06/04 15:11:15	小学/三年级	3	0	9	0	1	1	1	3	0	0	0
2021/06/04 14:57:14	小学/三年级	3	1	10	1	2	1	1	3	0	0	0
2021/06/04 14:55:48	小学/三年级	3	1	9	1	2	2	1	3	0	0	0
2021/06/04 14:46:08	小学/三年级	3	0	10	1	2	1	1	2	2	0	0
2021/06/04 14:42:39	小学/三年级	3	0	9	1	1	2	1	2	1	0	0
2021/06/04 14:39:56	小学/三年级	3	0	9	0	2	1	2	3	0	0	0
2021/06/04 14:38:41	小学/三年级	3	0	10	0	1	1	0	3	0	0	0
2021/06/04 14:38:33	小学/三年级	3	0	10	0	1	2	2	2	1	0	0
2021/06/04 14:38:16	小学/三年级	3	0	9	0	2	1	2	2	1	0	0
2021/06/04 14:36:47	小学/三年级	3	0	10	1	1	2	1	3	0	0	0
2021/06/04 14:37:56	小学/三年级	3	0	9	0	2	2	2	2	4	1	0
2021/06/04 14:37:19	小学/三年级	3	1	10	1	1	2	1	3	0	0	0
2021/06/04 14:35:34	小学/三年级	3	1	10	0	2	1	2	3	0	0	0
2021/06/04 14:36:29	小学/三年级	3	1	9	0	2	1	2	3	0	0	0
2021/06/04 14:35:12	小学/三年级	3	0	10	0	2	1	2	1	4	0	0
2021/06/04 14:35:31	小学/三年级	3	1	10	1	1	2	1	2	2	0	0
2021/06/04 14:35:43	小学/三年级	3	1	10	1	1	1	2	3	0	0	0
2021/06/04 14:34:17	小学/三年级	3	0	9	1	2	2	1	2	1	0	1
2021/06/04 14:34:43	小学/三年级	3	1	10	1	2	2	2	2	4	0	0
2021/06/04 14:35:12	小学/三年级	3	1	9	0	1	2	2	2	1	0	0
2021/06/04 14:33:30	小学/三年级	3	0	10	0	2	1	2	3	0	0	0
2021/06/04 14:34:00	小学/三年级	3	0	9	0	1	2	1	3	0	0	0
2021/06/04 14:31:44	小学/三年级	3	0	10	0	1	1	2	3	0	0	0
2021/06/04 14:33:54	小学/三年级	3	1	9	1	2	1	1	1	1	1	0
2021/06/04 14:35:28	小学/三年级	3	1	9	1	1	1	1	2	2	0	1
2021/06/04 14:31:43	小学/三年级	3	0	9	1	2	1	1	2	1	0	0
2021/06/04 14:31:37	小学/三年级	3	0	10	0	2	1	1	2	1	0	0
2021/06/04 14:30:54	小学/三年级	3	1	9	1	2	1	2	2	4	0	0
2021/06/04 14:29:51	小学/三年级	3	1	9	0	2	1	2	3	0	0	0
2021/06/04 14:28:49	小学/三年级	3	0	10	1	2	1	1	3	0	0	0
2021/06/04 14:31:16	小学/三年级	3	1	9	0	1	1	0	1	2	0	1
2021/06/04 14:25:16	小学/三年级	3	0	10	1	2	1	1	3	0	0	0
2021/06/04 14:25:27	小学/三年级	3	1	10	1	2	1	2	3	0	0	0
2021/06/04 14:25:42	小学/三年级	3	1	10	0	2	1	1	2	1	0	0
[truncated: 20,267 more rows]
